# Supplementary material
Source: PubMed Central journal article supplement (PMC3163049)
Supplement: NIHMS317954-supplement-1_si_001.pdf [file NIHMS317954-supplement-1_si_001.pdf]

## High-affinity DNA-targeting using Readily Accessible Mimics of N2'-Functionalized 2'-Amino- $\alpha$ -L-LNA

Saswata Karmakar,<sup>†</sup> Brooke A. Anderson,<sup>†,§</sup> Rie L. Rathje,<sup>†,‡,§</sup> Sanne Andersen,<sup>†,‡,§</sup> Troels B. Jensen,<sup>‡</sup> Poul Nielsen<sup>‡</sup> and Patrick J. Hrdlicka<sup>\*,†</sup>

<sup>†</sup>Department of Chemistry, University of Idaho, Moscow, ID-83844-2343, USA

<sup>§</sup>Nucleic Acid Center, Institute for Physics and Chemistry, University of Southern Denmark, 5230 Odense M, Denmark

### Contents

- S2 Additional discussion regarding formation of cyclic N2',O3'-hemiaminal ether (Scheme S1).
- S3 Representative RP-HPLC protocol (Table S1).
- S4 MALDI MS of synthesized ONs (Tables S2 and S3).
- S6 Representative thermal denaturation curves (Figure S1 and S2).
- S8 Discussion of RNA mismatch data (Table S4 and Figure S3).
- S10 Absorption data (320-360 nm) for modified ONs (Figure S4 and Tables S5 and S6).
- S12 Steady-state fluorescence emission spectra for modified ONs (Figure S5-S9).
- S17 Additional discussion of fluorescence emission spectra.
- S17 References.
- S18 NMR spectra of compounds **2-7**.

**Additional discussion regarding formation of cyclic N2',O3'-hemiaminal ether.** The structure of the cyclic N2',O3'-hemiaminal ether byproduct (Scheme S1) is supported by the following <sup>1</sup>H NMR observations (500 MHz, DMSO-*d*<sub>6</sub>, results not shown): a) appearance of the hemiaminal ether proton as a singlet at 6.07 ppm; b) absence of an exchangeable signal corresponding to a 3'-OH group, c) absence of a signal corresponding to a CH<sub>2</sub>-group linking the O2'-position and the pyrene moiety, and, d) appearance of the H1'-signal as a singlet at 6.13 ppm indicating formation of a restricted *North* type furanose conformation unlike what is observed for **6Q** (H1' signal appearing as a doublet at 6.43 ppm, *J* = 8.2 Hz). Despite formation of a new stereocenter, we only observed one set of signals, suggesting that only one of the diastereomers of the cyclic N2',O3'-hemiaminal ether byproduct is formed.

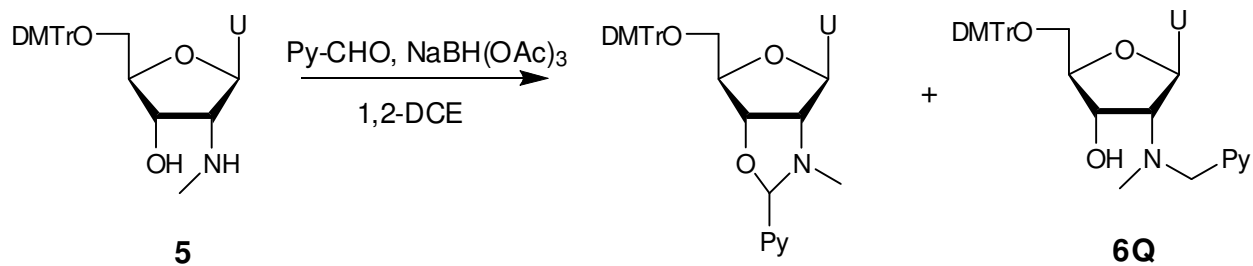

**Scheme S1.** Formation of cyclic N2',O3'-hemiaminal ether during **5**→**6Q**

**Table S1.** Representative RP-HPLC protocol.<sup>a</sup>

| t [min] | Buffer A [v%] | Buffer B [v%] |
|---------|---------------|---------------|
| 0       | 100           | 0             |
| 2       | 100           | 0             |
| 50      | 30            | 70            |
| 64      | 0             | 100           |
| 69      | 0             | 100           |

<sup>a</sup> Buffer A is 0.05 M TEAA (triethyl ammonium acetate) pH 7.0 while buffer B is 75% MeCN in H<sub>2</sub>O v/v. A flow rate of 1.2 mL/min was used.

**Table S2.** MALDI-MS of ONs modified with O2'-alkylated RNA monomers.<sup>a</sup>

| ONs       | Sequence                                 | Calc. $m/z$ [M] | Found $m/z$ [M+H] |
|-----------|------------------------------------------|-----------------|-------------------|
| <b>W1</b> | 5'-G <u>W</u> G ATA TGC                  | 2880            | 2881              |
| <b>W2</b> | 5'-GTG A <u>W</u> A TGC                  | 2880            | 2881              |
| <b>W3</b> | 5'-GTG ATA <u>W</u> GC                   | 2880            | 2881              |
| <b>W4</b> | 3'-CAC <u>W</u> AT ACG                   | 2809            | 2810              |
| <b>W5</b> | 3'-CAC TA <u>W</u> ACG                   | 2809            | 2810              |
| <b>X1</b> | 5'-G <u>X</u> G ATA TGC                  | 2954            | 2955              |
| <b>X2</b> | 5'-GTG A <u>X</u> A TGC                  | 2954            | 2955              |
| <b>X3</b> | 5'-GTG ATA <u>X</u> GC                   | 2954            | 2955              |
| <b>X4</b> | 3'-CAC <u>X</u> AT ACG                   | 2883            | 2884              |
| <b>X5</b> | 3'-CAC TA <u>X</u> ACG                   | 2883            | 2884              |
| <b>X6</b> | 3'-CAC <u>XAX</u> ACG                    | 3085            | 3086              |
| <b>X7</b> | 5'-G <u>X</u> G A <u>X</u> A <u>X</u> GC | 3358            | 3359              |
| <b>Y1</b> | 5'-G <u>Y</u> G ATA TGC                  | 2968            | 2969              |
| <b>Y2</b> | 5'-GTG A <u>Y</u> A TGC                  | 2968            | 2969              |
| <b>Y3</b> | 5'-GTG ATA <u>Y</u> GC                   | 2968            | 2969              |
| <b>Y4</b> | 3'-CAC <u>Y</u> AT ACG                   | 2897            | 2898              |
| <b>Y5</b> | 3'-CAC TA <u>Y</u> ACG                   | 2897            | 2898              |
| <b>Y6</b> | 3'-CAC <u>YAY</u> ACG                    | 3113            | 3114              |
| <b>Y7</b> | 5'-G <u>Y</u> G A <u>Y</u> A <u>Y</u> GC | 3400            | 3401              |
| <b>Z1</b> | 5'-G <u>Z</u> G ATA TGC                  | 3066            | 3067              |
| <b>Z2</b> | 5'-GTG A <u>Z</u> A TGC                  | 3066            | 3067              |
| <b>Z3</b> | 5'-GTG ATA <u>Z</u> GC                   | 3066            | 3067              |
| <b>Z4</b> | 3'-CAC <u>Z</u> AT ACG                   | 2995            | 2996              |
| <b>Z5</b> | 3'-CAC TA <u>Z</u> ACG                   | 2995            | 2996              |
| <b>Z6</b> | 3'-CAC <u>ZAZ</u> ACG                    | 3309            | 3310              |
| <b>Z7</b> | 5'-G <u>Z</u> G A <u>Z</u> A <u>Z</u> GC | 3694            | 3695              |

<sup>a</sup> For structure of monomers **V-Z** see Figure 1 in the main manuscript.

**Table S3.** MALDI-MS of ONs modified with N2'-functionalized 2'-amino-2'-deoxy-2'-*N*-methyl-uridine monomers.<sup>a</sup>

| ONs       | Sequence                       | Calc. $m/z$ [M] | Found $m/z$ [M+H] |
|-----------|--------------------------------|-----------------|-------------------|
| <b>Q1</b> | 5'-G <b>Q</b> G ATA TGC        | 2982            | 2983              |
| <b>Q2</b> | 5'-GTG A <b>Q</b> A TGC        | 2982            | 2983              |
| <b>Q4</b> | 3'-CAC <b>Q</b> AT ACG         | 2911            | 2912              |
| <b>Q5</b> | 3'-CAC TA <b>Q</b> ACG         | 2911            | 2912              |
| <b>Q6</b> | 3'-CAC <b>Q</b> A <b>Q</b> ACG | 3140            | 3141              |
| <b>S1</b> | 5'-G <b>S</b> G ATA TGC        | 2996            | 2997              |
| <b>S2</b> | 5'-GTG A <b>S</b> A TGC        | 2996            | 2997              |
| <b>S4</b> | 3'-CAC <b>S</b> AT ACG         | 2925            | 2926              |
| <b>S5</b> | 3'-CAC TA <b>S</b> ACG         | 2925            | 2926              |
| <b>S6</b> | 3'-CAC <b>S</b> A <b>S</b> ACG | 3168            | 3169              |
| <b>V1</b> | 5'-G <b>V</b> G ATA TGC        | 3009            | 3010              |
| <b>V2</b> | 5'-GTG A <b>V</b> A TGC        | 3009            | 3010              |
| <b>V4</b> | 3'-CAC <b>V</b> AT ACG         | 2938            | 2939              |
| <b>V5</b> | 3'-CAC TA <b>V</b> ACG         | 2938            | 2939              |
| <b>V6</b> | 3'-CAC <b>V</b> A <b>V</b> ACG | 3195            | 3196              |

<sup>a</sup> For structure of monomers **V-Z** see Figure 1 in the main manuscript.

Representative thermal denaturation curves.

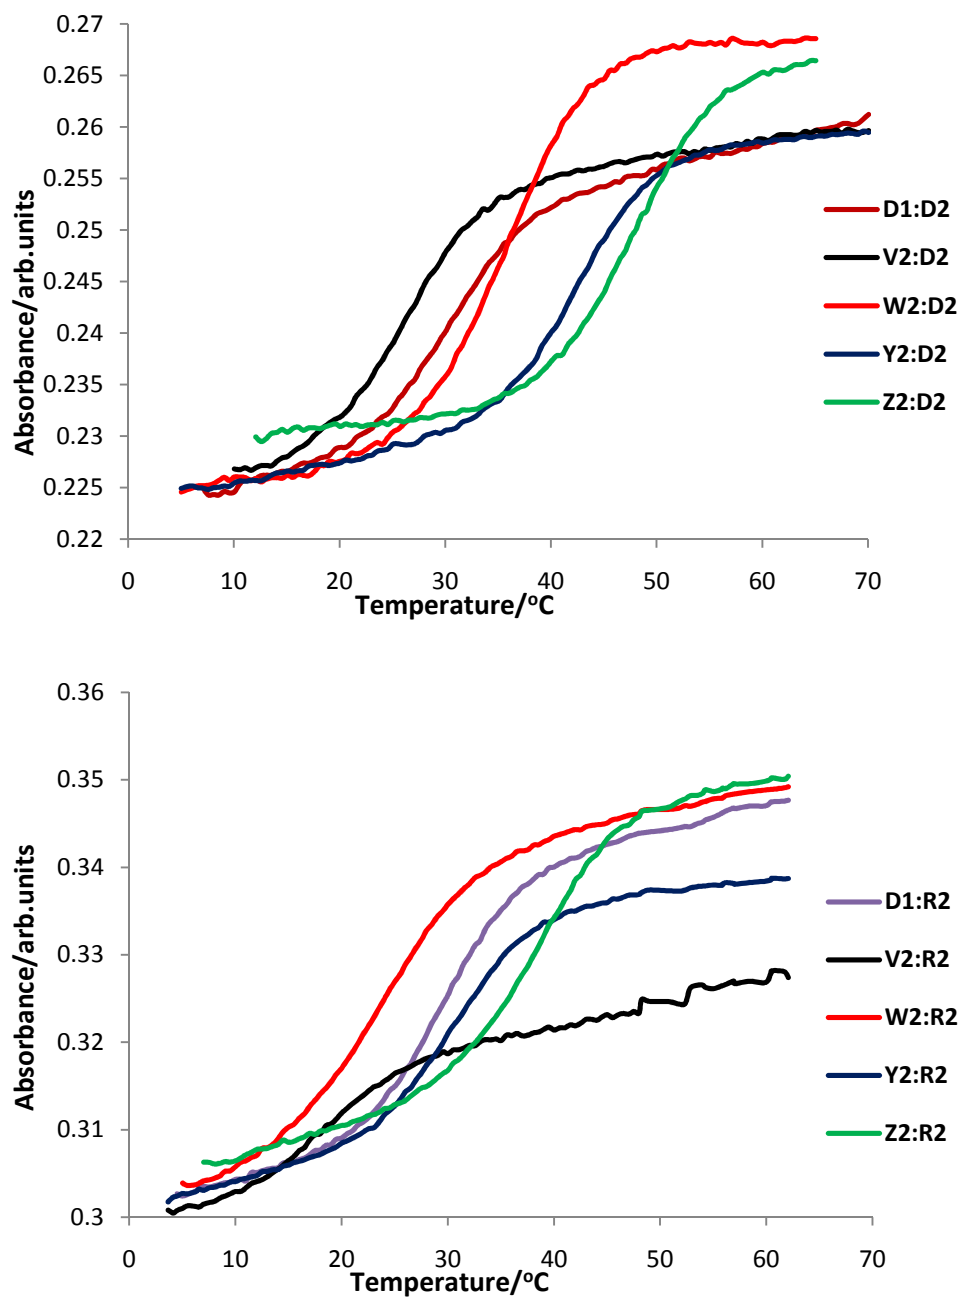

**Figure S1.** Thermal denaturation curves of duplexes between **V2-Z2** and complementary DNA (upper panel) or RNA (lower panel) targets. Unmodified reference duplexes are denoted **D1:D2** and **D1:R2**.

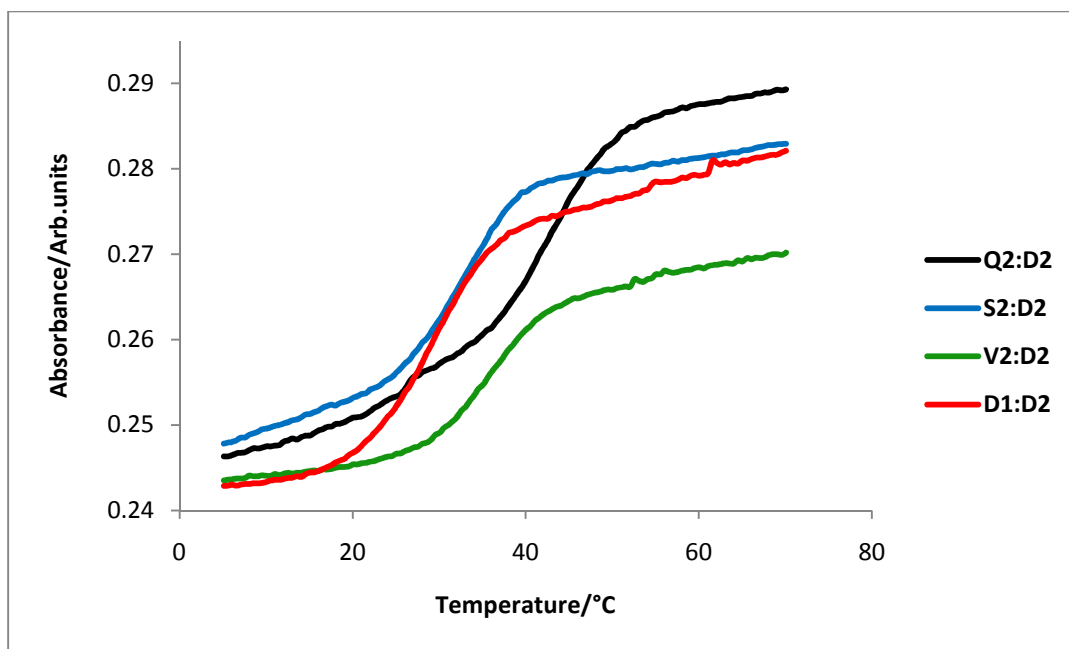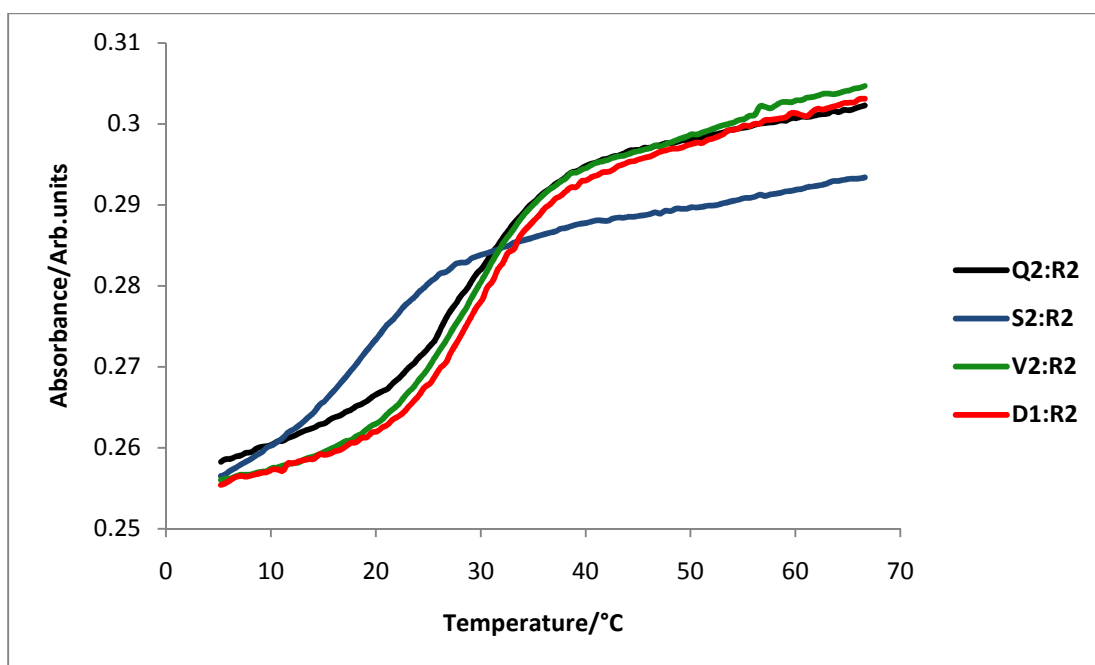

**Figure S2.** Thermal denaturation curves of duplexes between **Q2-V2** and complementary DNA (upper panel) or RNA (lower panel) targets. Unmodified reference duplexes are denoted **D1:D2** and **D1:R2**.

**Table S4.** Discrimination of mismatched RNA targets by **B2**-series and reference strands.<sup>a</sup>

| ON                      | Sequence                | <b>B</b> = | RNA: 3'-CAC <b>U</b> <u><b>B</b></u> ACG |        |                   |        |
|-------------------------|-------------------------|------------|------------------------------------------|--------|-------------------|--------|
|                         |                         |            | $T_m$ [°C]                               |        | $\Delta T_m$ [°C] |        |
|                         |                         |            | A                                        | C      | G                 | U      |
| <b>D1</b>               | 5'-GTG ATA TGC          |            | <b>26.5</b>                              | <-16.5 | -4.5              | <-16.5 |
| <b>W2</b>               | 5'-GTG A <b>W</b> A TGC |            | <b>16.0</b>                              | -1.0   | +0.5              | +6.0   |
| <b>X2</b>               | 5'-GTG A <b>X</b> A TGC |            | <b>22.5</b>                              | -11.5  | -5.0              | <-12.5 |
| <b>Y2</b>               | 5'-GTG A <b>Y</b> A TGC |            | <b>31.0</b>                              | -17.5  | -3.5              | -9.5   |
| <b>Z2</b>               | 5'-GTG A <b>Z</b> A TGC |            | <b>37.0</b>                              | -12.0  | -9.0              | -13.0  |
| <b>Q2</b>               | 5'-GTG A <b>Q</b> A TGC |            | <b>29.0</b>                              | -16.5  | -0.5              | -13.0  |
| <b>S2</b>               | 5'-GTG A <b>S</b> A TGC |            | <b>18.0</b>                              | <-8.5  | -6.0              | -6.0   |
| <b>V2</b>               | 5'-GTG A <b>V</b> A TGC |            | <b>28.0</b>                              | -16.5  | -1.0              | -7.5   |
| <b>L2</b> <sup>S1</sup> | 5'-GTG A <b>L</b> A TGC |            | <b>31.5</b>                              | -12.0  | -1.0              | -4.5   |

<sup>a</sup>For conditions of thermal denaturation experiments, see Table 1.  $T_m$ -values of fully matched duplexes are shown in bold.  $\Delta T_m$  = change in  $T_m$  relative to fully matched DNA:RNA duplex.

**Discussion of RNA mismatch data.** Reference strand **D1** displays the expected specificity profile against mismatched RNA targets, i.e., a) formation of mismatched duplexes with reduced thermostability, and b) less efficient discrimination of targets leading to formation of U:rG-mismatched base pairs (Table S4). Monomers **Q-Z** fall into very distinctive categories with respect to RNA target affinity/specificity (Fig. S3), i.e., O2'-Nap monomer **W** (very poor/very poor); N2'-PyCO monomer **S** (very poor/poor); O2'-Py monomer **X** (very poor/moderate); N2'-PyAc monomer **V** (poor/poor); N2'-PyMe monomer **Q** (poor/poor); O2'-PyMe monomer **Y** (moderate/poor); regular DNA (moderate/moderate); O2'-CorMe monomer **Y** (high/moderate) and N2'-PyMe- $\alpha$ -L-LNA monomer **L** (high/very poor).



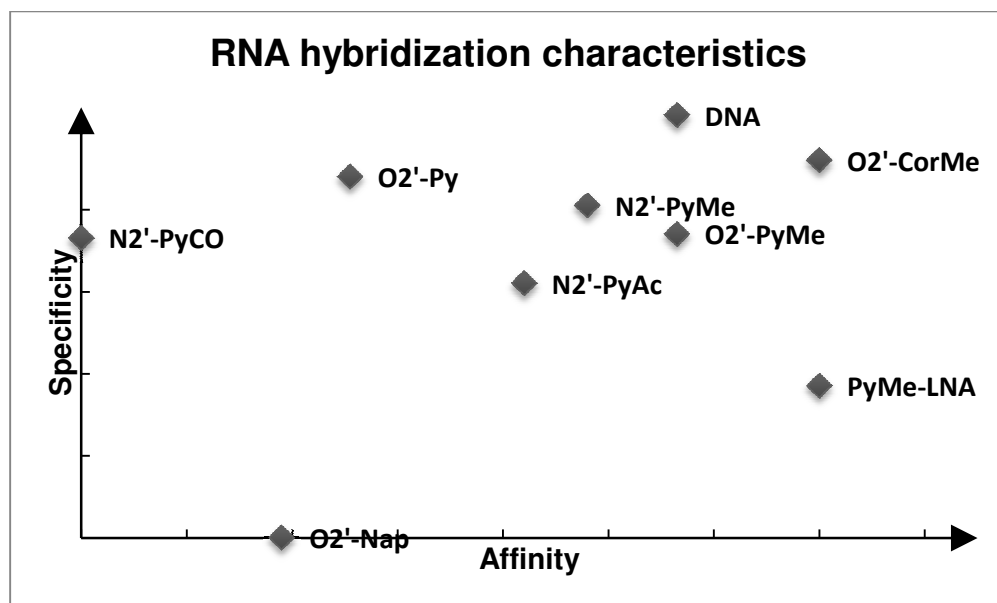

**Figure S3.** Representation of RNA hybridization characteristics (affinity vs specificity) of ONs modified with monomers **Q-Z** relative to unmodified DNA strand.

## Absorption data for modified ONs.

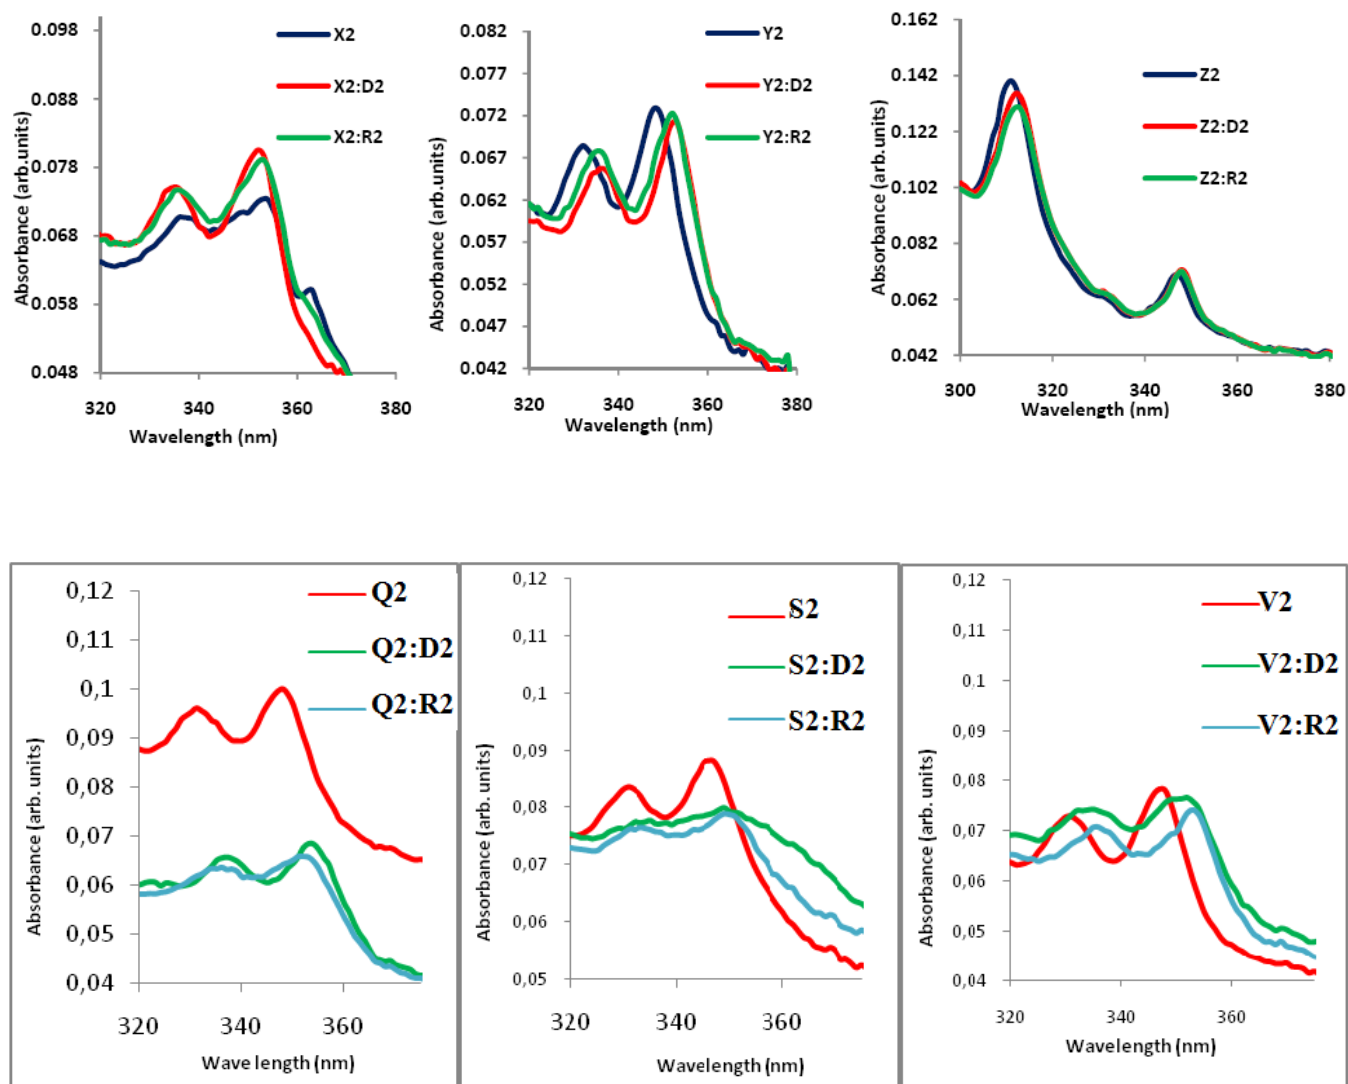

**Figure S4.** Absorption spectra of X2, Y2, Z2, Q2, S2 and V2 and their duplexes with complementary DNA (D2) and RNA (R2) targets. For experimental conditions see Table S5.

**Table S5.** Absorption maxima in the 320-360 nm region for ONs modified with O2'-alkylated RNA monomers **X-Z** or 2'-*N*-(pyren-1-yl)methyl-2'-amino- $\alpha$ -L-LNA monomer **L** in the presence or absence of complementary DNA/RNA targets.<sup>a</sup>

| ON        | Sequence               | <b>B=</b> | $\lambda_{\max}[\Delta\lambda_{\max}]$ (nm) |         |                |          |         |         |          |         |         | <b>L</b> <sup>S1</sup> |         |                |
|-----------|------------------------|-----------|---------------------------------------------|---------|----------------|----------|---------|---------|----------|---------|---------|------------------------|---------|----------------|
|           |                        |           | <b>X</b>                                    |         |                | <b>Y</b> |         |         | <b>Z</b> |         |         | ss                     | +DNA    | +RNA           |
|           |                        |           | ss                                          | +DNA    | +RNA           | ss       | +DNA    | +RNA    | ss       | +DNA    | +RNA    | ss                     | +DNA    | +RNA           |
| <b>B1</b> | 5'- <b>GBG</b> ATA TGC |           | 349                                         | 352[+3] | 351[+2]        | 350      | 353[+3] | 352[+2] | 347      | 348[+1] | 348[+1] | 348                    | 350[+2] | <i>349[+1]</i> |
| <b>B2</b> | 5'-GTG <b>ABA</b> TGC  |           | 353                                         | 352[-1] | 352[±0]        | 348      | 353[+5] | 352[+4] | 347      | 348[+1] | 348[+1] | 347                    | 351[+4] | 349[+2]        |
| <b>B3</b> | 5'-GTG ATA <b>BGC</b>  |           | 352                                         | 352[±0] | <i>352[±0]</i> | 350      | 353[+3] | 352[+2] | 348      | 348[±0] | 348[±0] | 348                    | 351[+3] | <i>350[+2]</i> |
| <b>B4</b> | 3'-CAC <b>BAT</b> ACG  |           | 350                                         | 352[+2] | <i>352[+2]</i> | 350      | 352[+2] | 352[+2] | 347      | 348[+1] | 348[+1] | 348                    | 350[+2] | <i>348[±0]</i> |
| <b>B5</b> | 3'-CAC <b>TAB</b> ACG  |           | 353                                         | 352[-1] | 352[-1]        | 349      | 353[+4] | 352[+3] | 347      | 348[+1] | 347[±0] | 348                    | 350[+2] | 349[+1]        |

<sup>a</sup>Measurements were performed at room temperature (monomer **L**), 10 °C (monomer **Z**) and 7 °C (monomer **X** and **Y**) using a spectrophotometer and quartz optical cells with a 1.0 cm path length. Buffer conditions are as for thermal denaturation experiments. Values in italics are for duplexes with low thermostability (partial duplex dissociation at experimental temperature possible).

**Table S6.** Absorption maxima in the 320-360 nm region for ONs modified with N2'-functionalized 2'-*N*-methyl 2'-aminodeoxyuridine monomers **Q/S/V** in the presence or absence of complementary DNA/RNA targets.<sup>a</sup>

| ON        | Sequence               | <b>B=</b> | $\lambda_{\max}[\Delta\lambda_{\max}]$ (nm) |         |         |          |         |                |          |         |         | <b>L</b> <sup>S1</sup> |         |                |
|-----------|------------------------|-----------|---------------------------------------------|---------|---------|----------|---------|----------------|----------|---------|---------|------------------------|---------|----------------|
|           |                        |           | <b>Q</b>                                    |         |         | <b>S</b> |         |                | <b>V</b> |         |         | ss                     | +DNA    | +RNA           |
|           |                        |           | ss                                          | +DNA    | +RNA    | ss       | +DNA    | +RNA           | ss       | +DNA    | +RNA    | ss                     | +DNA    | +RNA           |
| <b>B1</b> | 5'- <b>GBG</b> ATA TGC |           | 349                                         | 353[+4] | 351[+2] | 347      | 351[+4] | <i>348[+1]</i> | 348      | 352[+4] | 352[+4] | 348                    | 350[+2] | <i>349[+1]</i> |
| <b>B2</b> | 5'-GTG <b>ABA</b> TGC  |           | 348                                         | 353[+5] | 351[+3] | 346      | 349[+3] | 349[+3]        | 347      | 352[+5] | 353[+6] | 347                    | 351[+4] | 349[+2]        |
| <b>B4</b> | 3'-CAC <b>BAT</b> ACG  |           | 349                                         | 354[+5] | 349[±0] | 348      | 350[+2] | <i>348[±0]</i> | 349      | 353[+4] | 352[+3] | 348                    | 350[+2] | <i>348[±0]</i> |
| <b>B5</b> | 3'-CAC <b>TAB</b> ACG  |           | 348                                         | 354[+6] | 352[+4] | 346      | 348[+2] | 350[+4]        | 347      | 352[+5] | 352[+5] | 348                    | 350[+2] | 349[+1]        |

<sup>a</sup>Measurements were performed at 5 °C. See Table S5 for further information on experimental conditions.

## Steady-state fluorescence emission spectra for modified ONs.

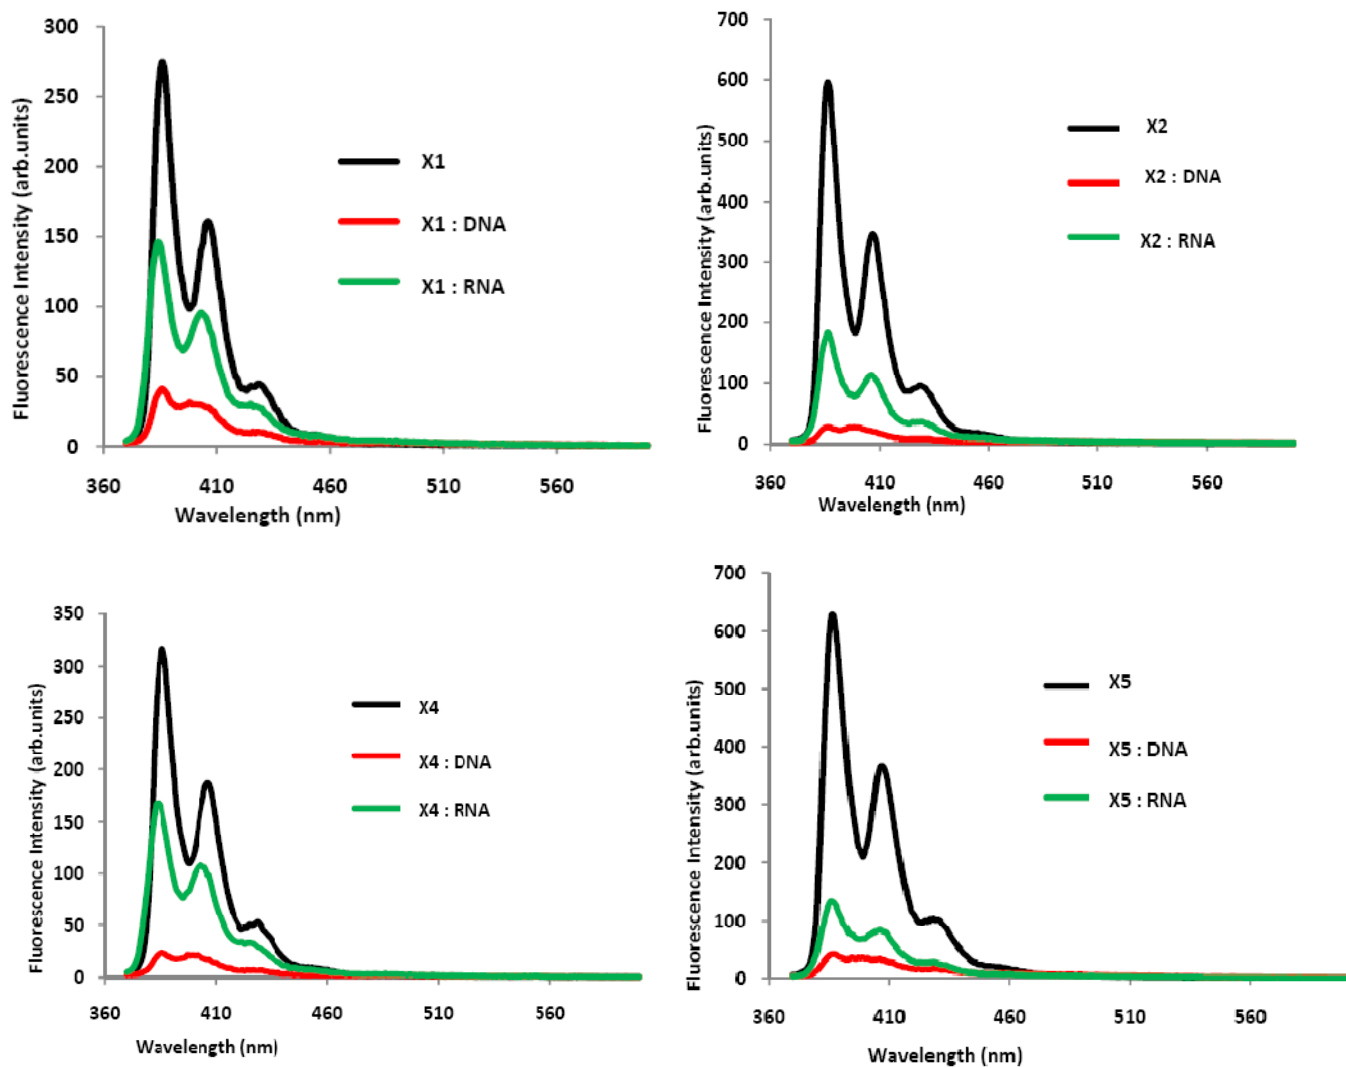

**Figure S5.** Fluorescence emission spectra of X-series in presence or absence of complementary DNA/RNA ( $\lambda_{\text{ex}} = 350 \text{ nm}$ ;  $T = 5 \text{ }^\circ\text{C}$ ;  $[\text{ON}] = 1.0 \text{ } \mu\text{M}$ ). Please note that different Y-axes are used.

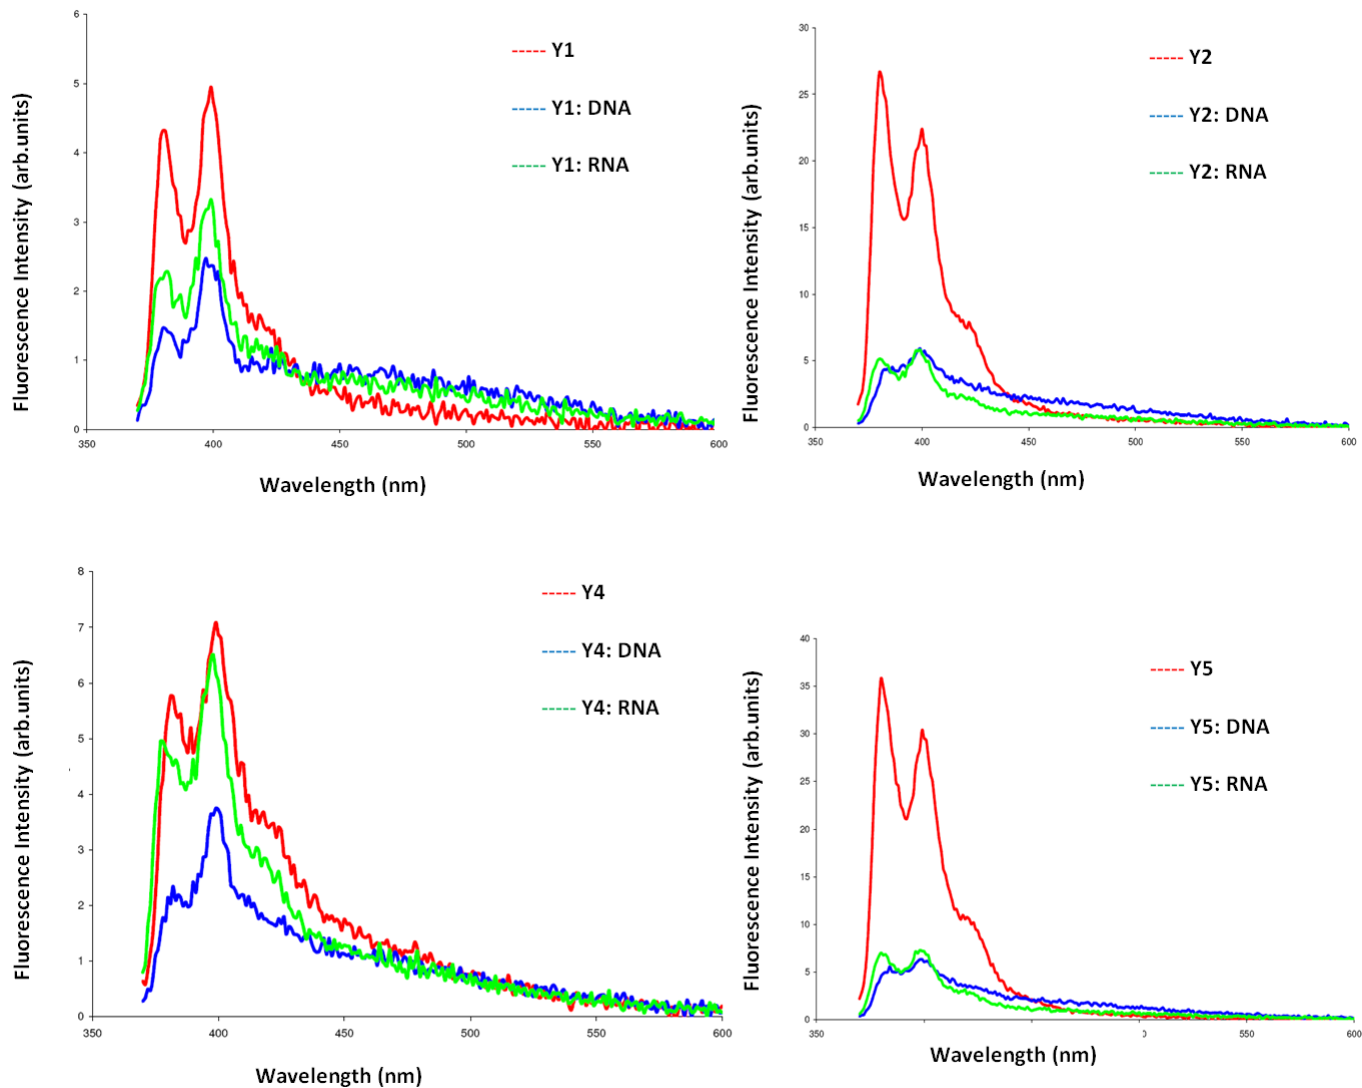

**Figure S6.** Fluorescence emission spectra of Y-series in presence or absence of complementary DNA/RNA ( $\lambda_{\text{ex}} = 350 \text{ nm}$ ;  $T = 5 \text{ }^\circ\text{C}$ ;  $[\text{ON}] = 1.0 \text{ } \mu\text{M}$ ). Please note that different Y-axes are used.

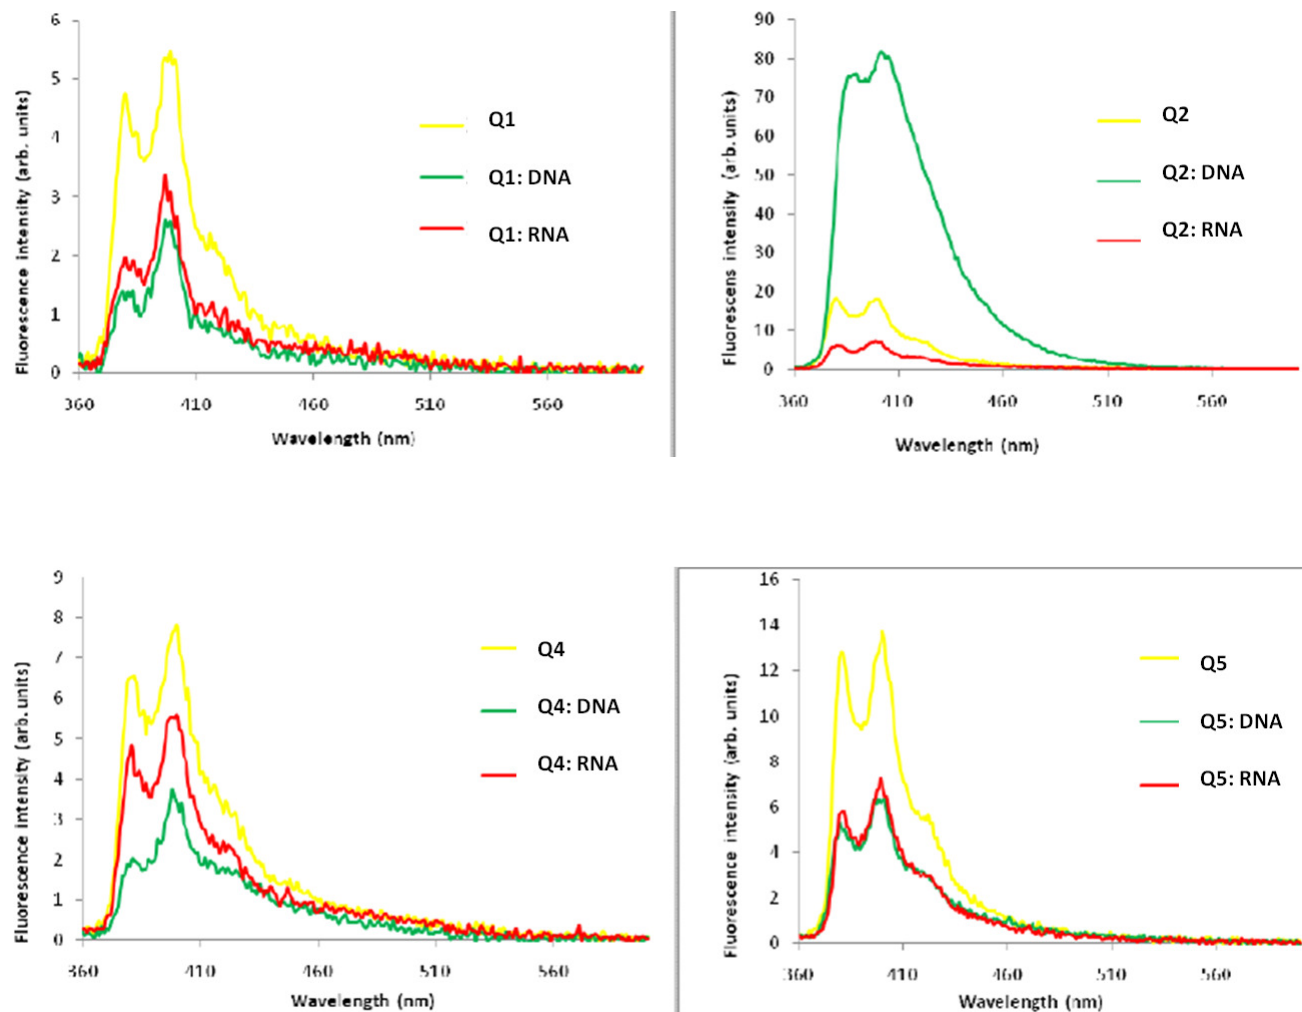

**Figure S7.** Fluorescence emission spectra of Q-series in presence or absence of complementary DNA/RNA ( $\lambda_{ex} = 350$  nm;  $T = 5$  °C;  $[ON] = 1.0$   $\mu$ M). Please note that different Y-axes are used.

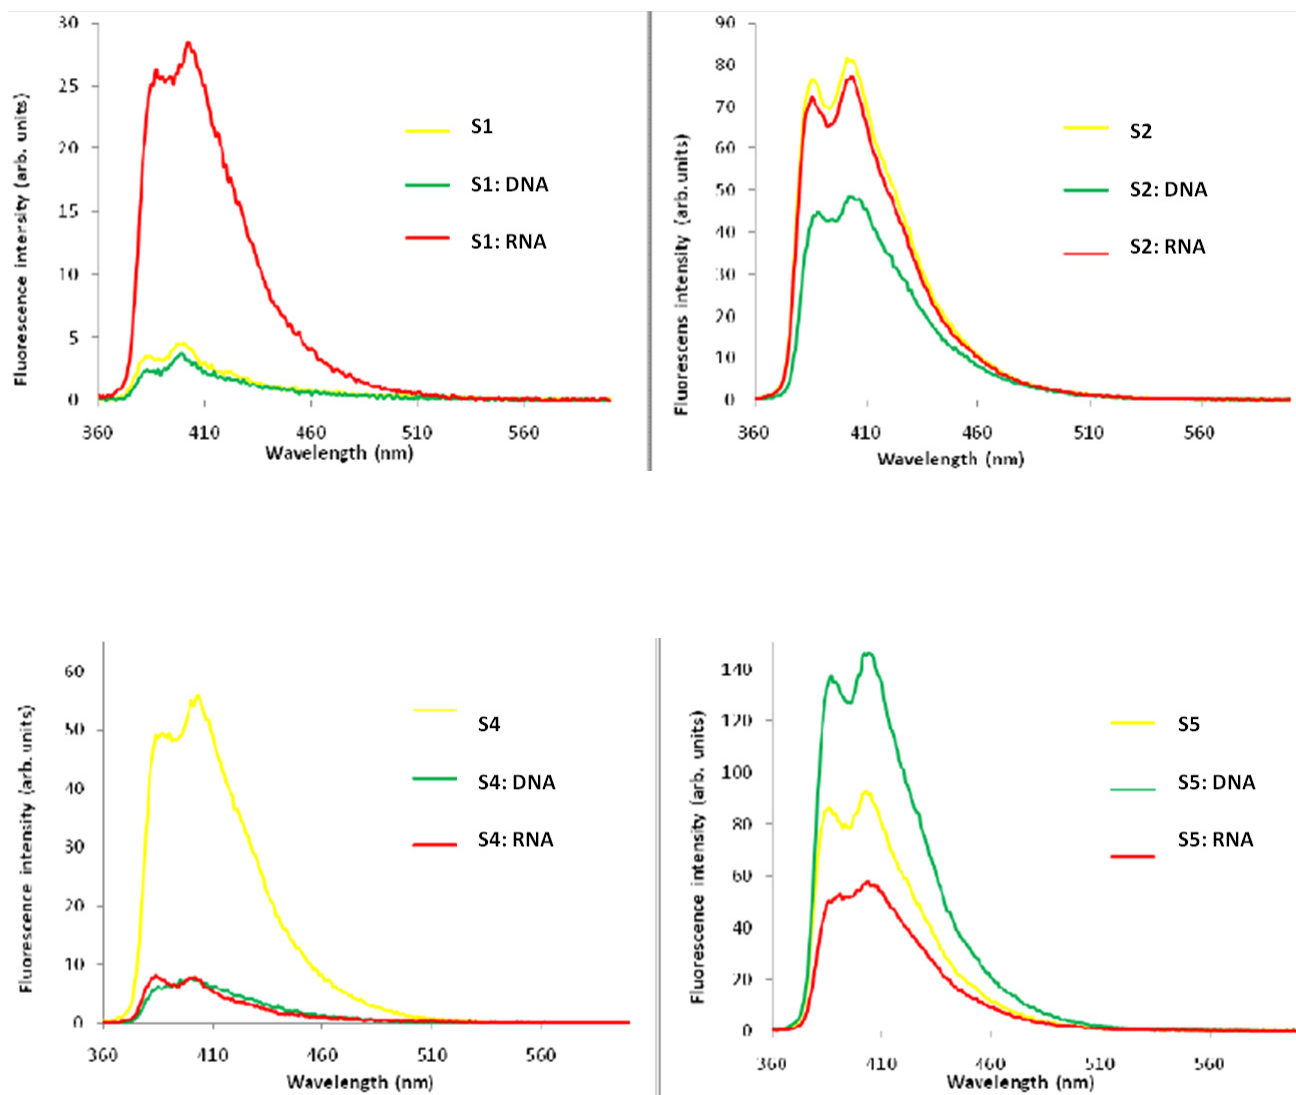

**Figure S8.** Fluorescence emission spectra of S-series in presence or absence of complementary DNA/RNA ( $\lambda_{\text{ex}} = 350 \text{ nm}$ ;  $T = 5 \text{ }^\circ\text{C}$ ;  $[\text{ON}] = 1.0 \text{ } \mu\text{M}$ ). Please note that different Y-axes are used.

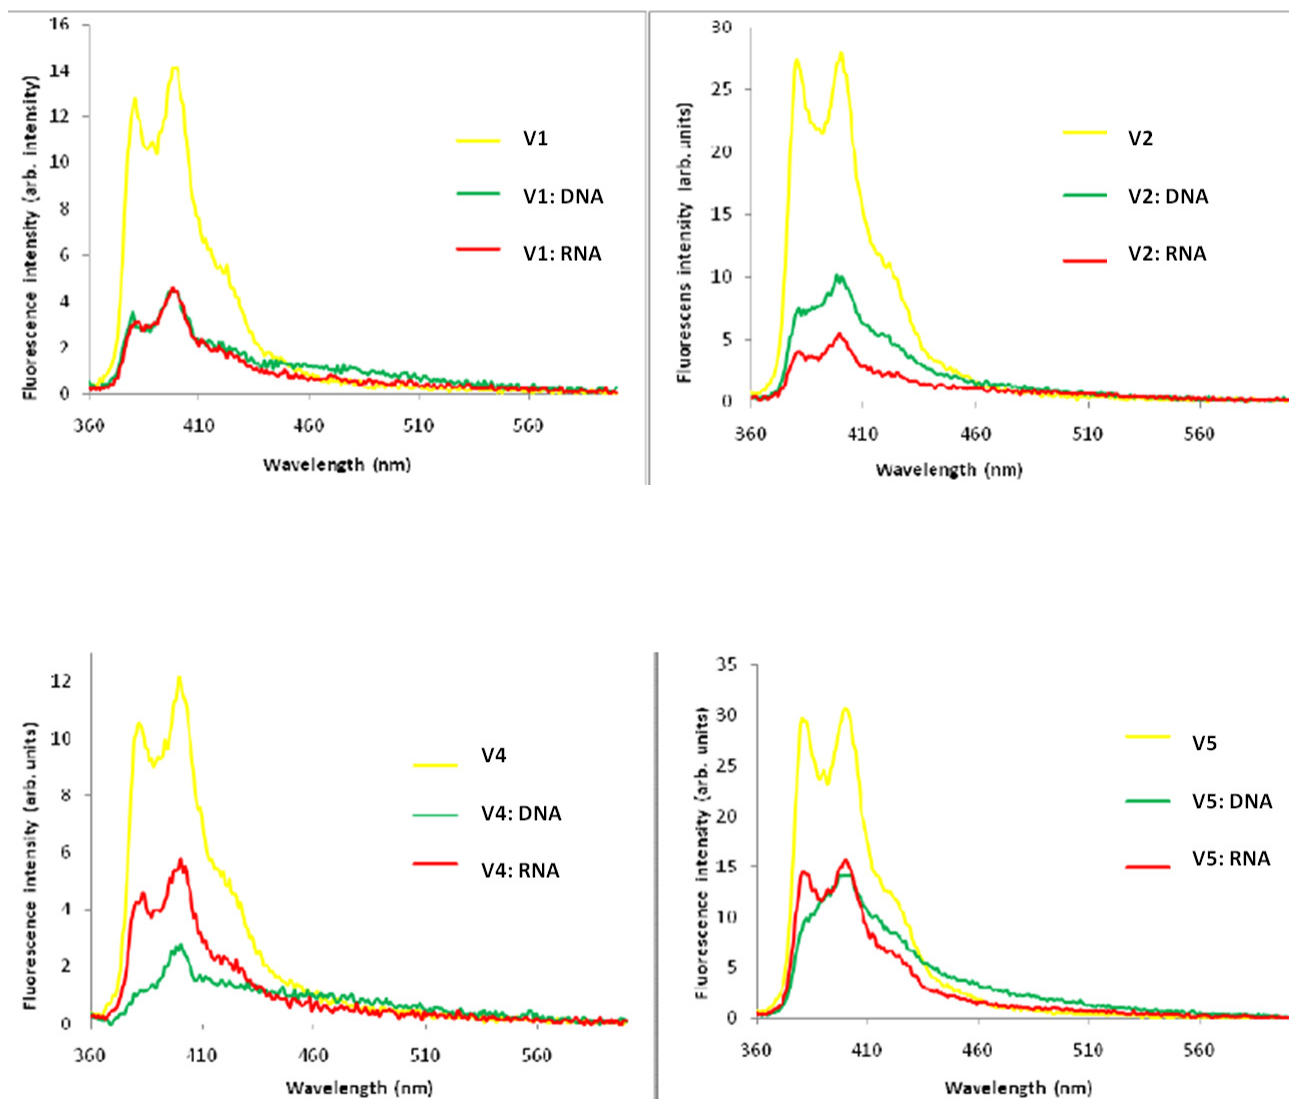

**Figure S9.** Fluorescence emission spectra of V-series in presence or absence of complementary DNA/RNA ( $\lambda_{\text{ex}} = 350 \text{ nm}$ ;  $T = 5 \text{ }^\circ\text{C}$ ;  $[\text{ON}] = 1.0 \text{ } \mu\text{M}$ ). Please note that different Y-axes are used.



**Additional discussion of fluorescence emission spectra.** Fluorescence emission spectra involving O2'-Py-modified ONs (X-series) have several distinct features: (a) the emission profiles are sharper and considerably more intense than for the other pyrene-functionalized ONs and (b) low  $I_{III}/I_I$ -ratios are observed for single stranded probes and the corresponding duplexes with complementary RNA, while increased  $I_{III}/I_I$ -ratios are observed upon hybridization with complementary DNA (Figure S5). These observations suggest that the pyrene is positioned in a polar microenvironment in the single stranded state and in heteroduplexes with RNA, while positioned in a more hydrophobic region in duplexes with DNA,<sup>S2</sup> which is consistent with partial intercalation.

#### **References.**

- (S1) Kumar, T. S.; Madsen, A. S.; Østergaard, M. E.; Sau, S. P.; Wengel, J.; Hrdlicka, P. J. *J. Org. Chem.* **2009**, *74*, 1070-1081.
- (S2) Kalyanasundaram, K.; Thomas, J. K. *J. Am. Chem. Soc.* **1977**, *99*, 2039–2044.
