# Supplementary material
Source: PubMed Central journal article supplement (PMC3163049)

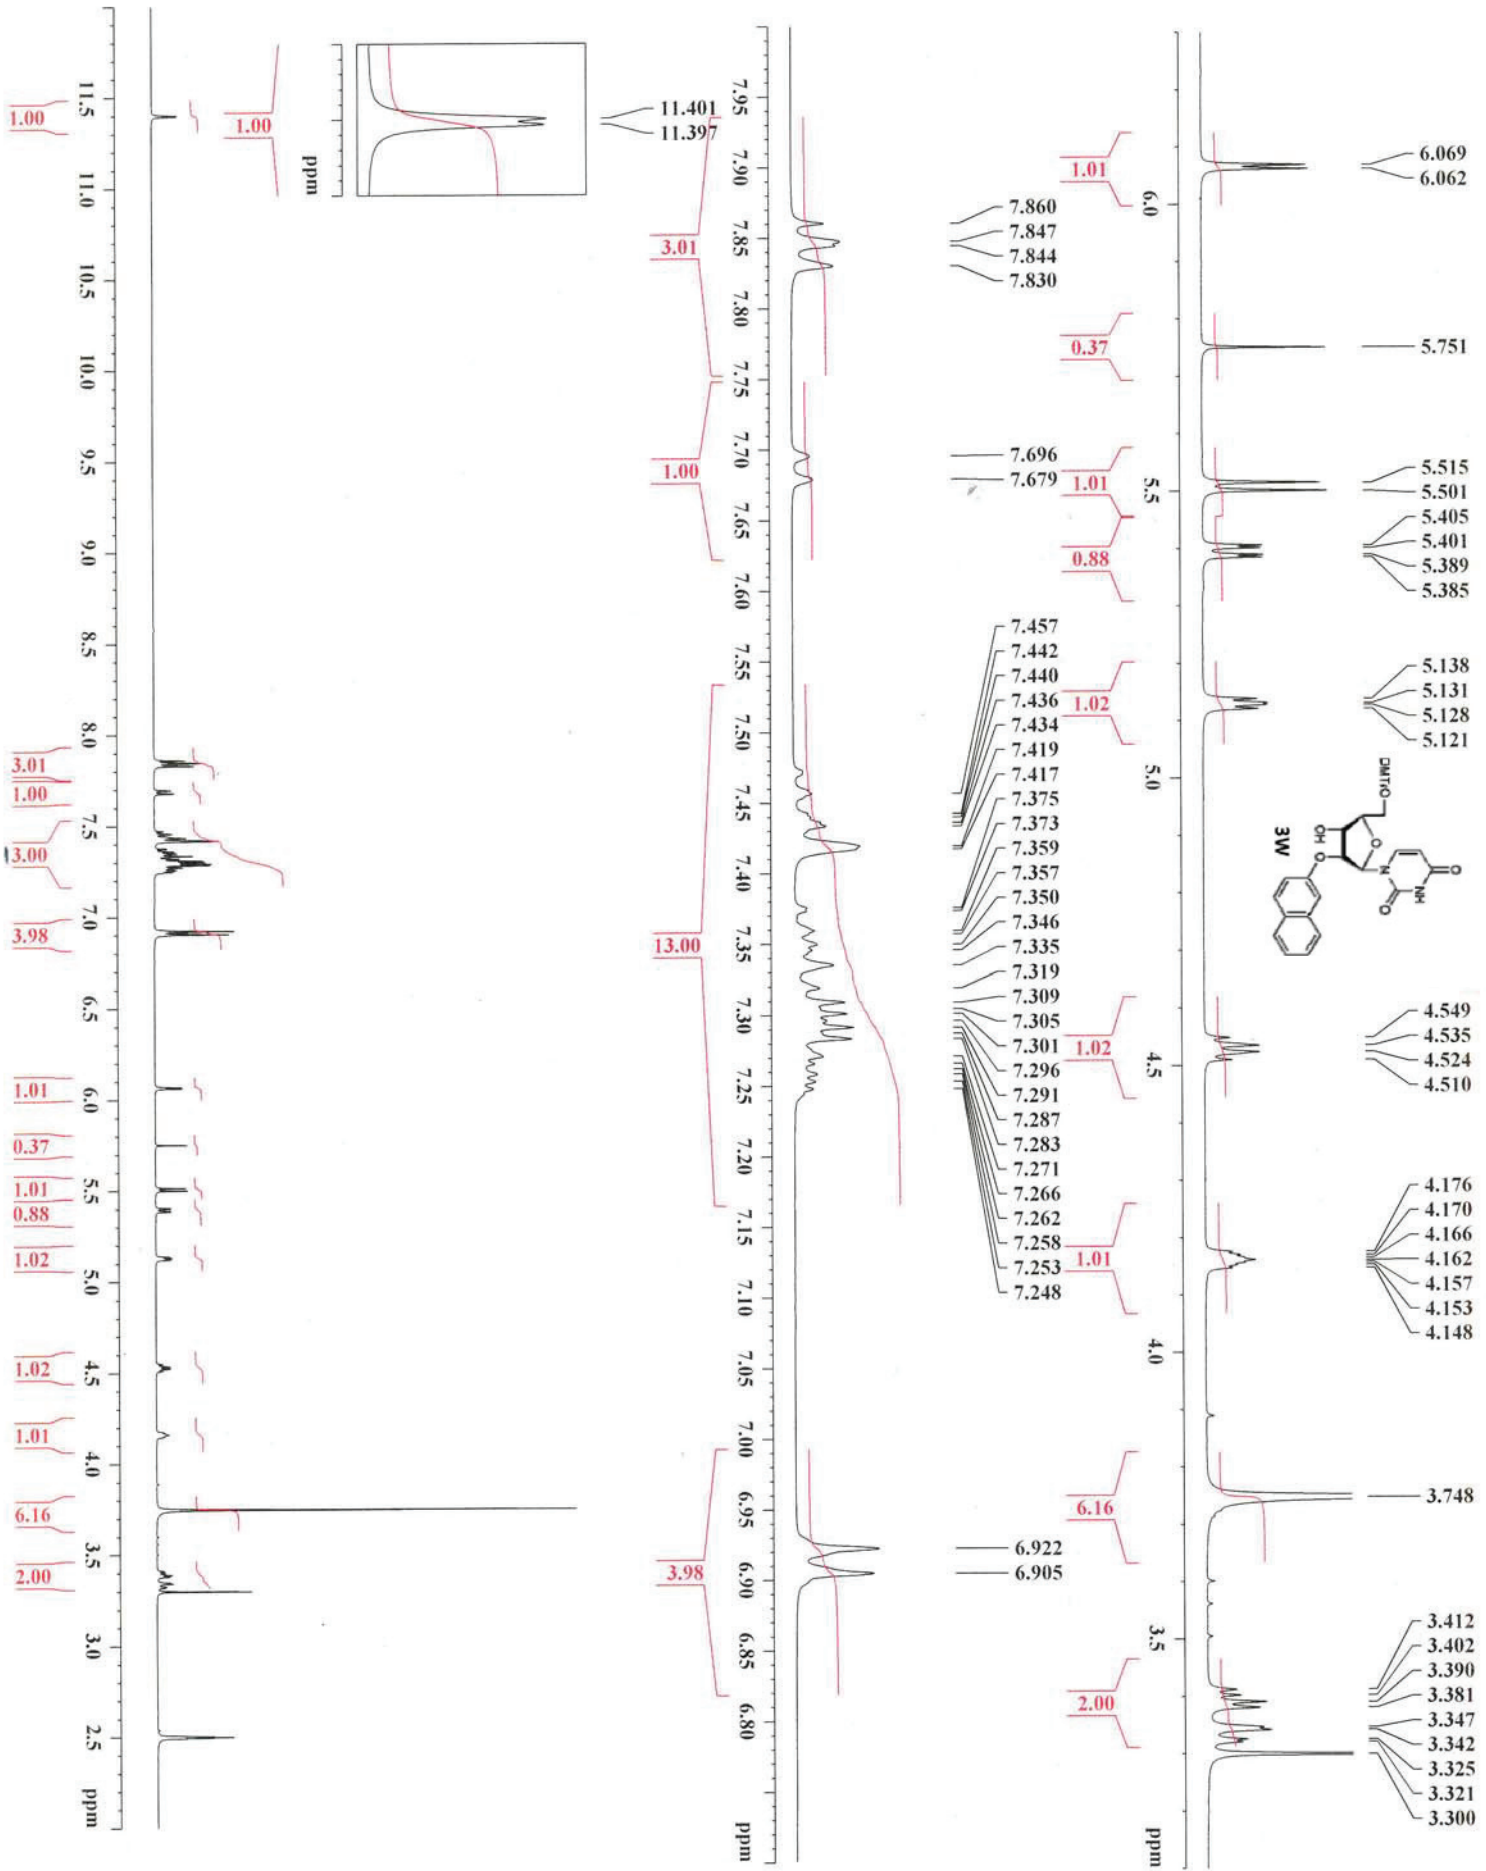

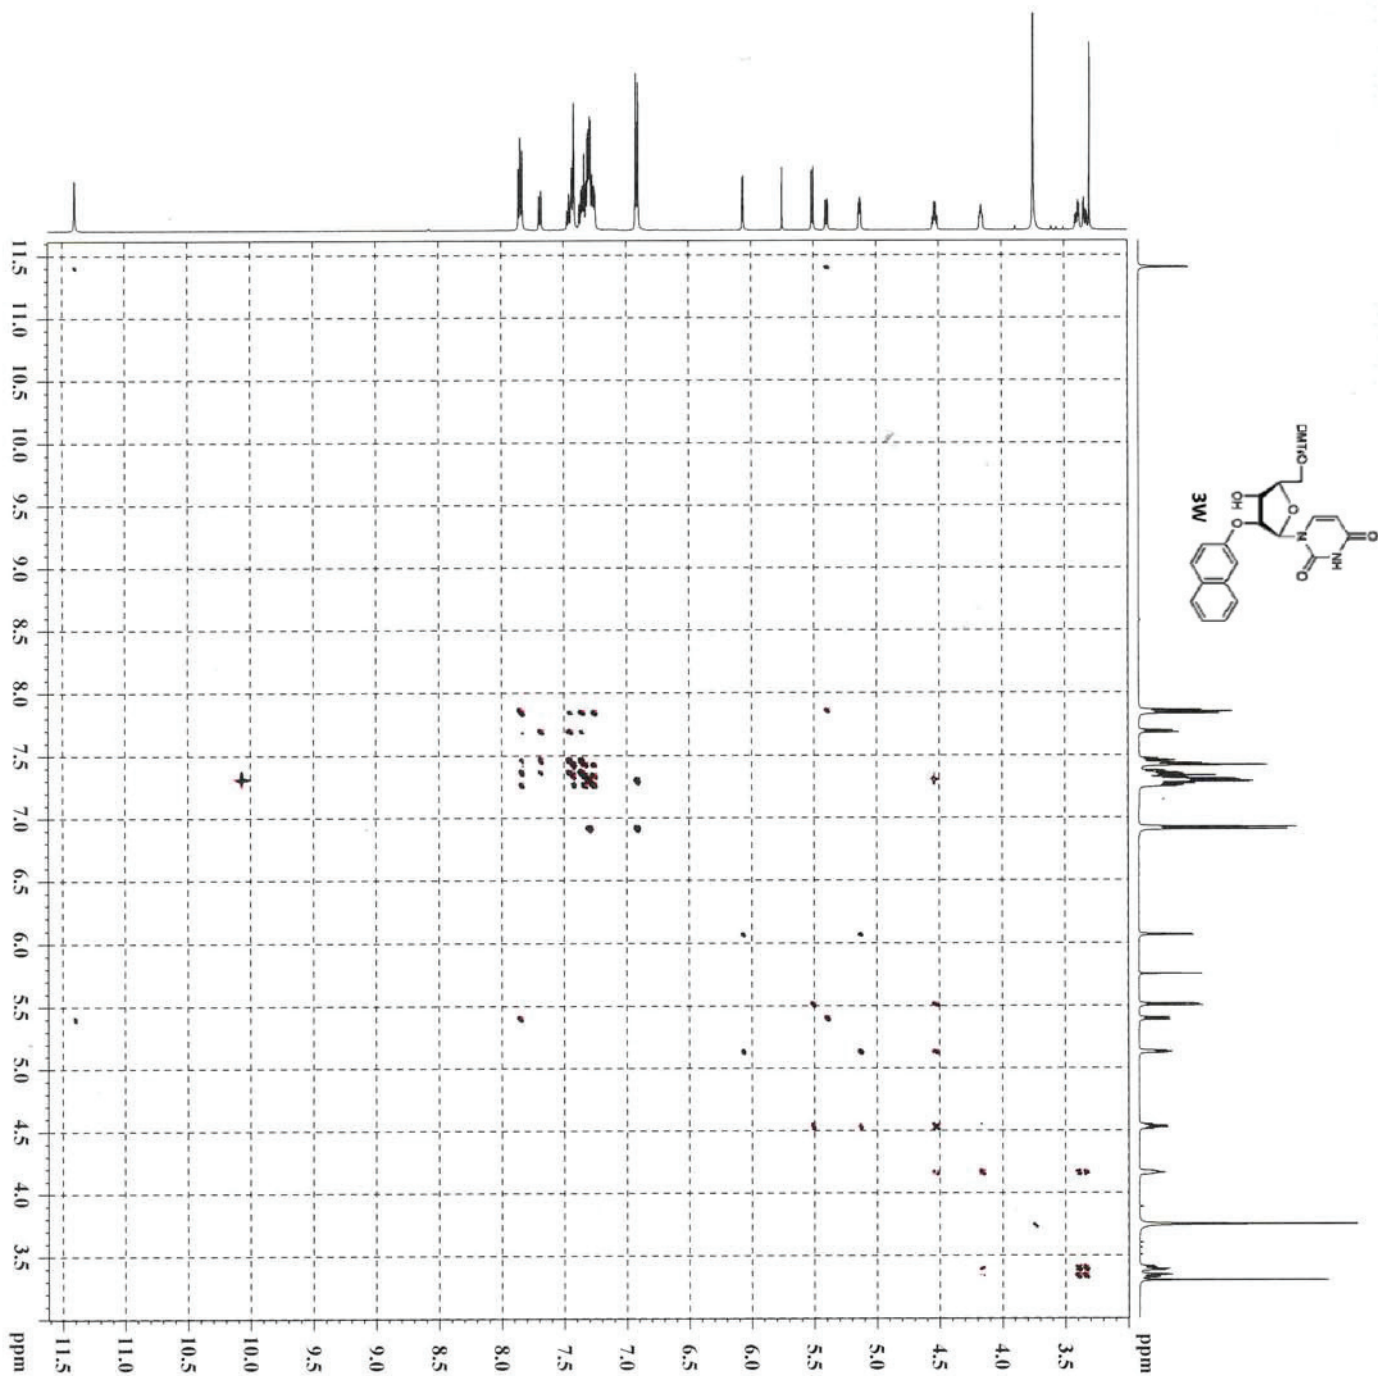

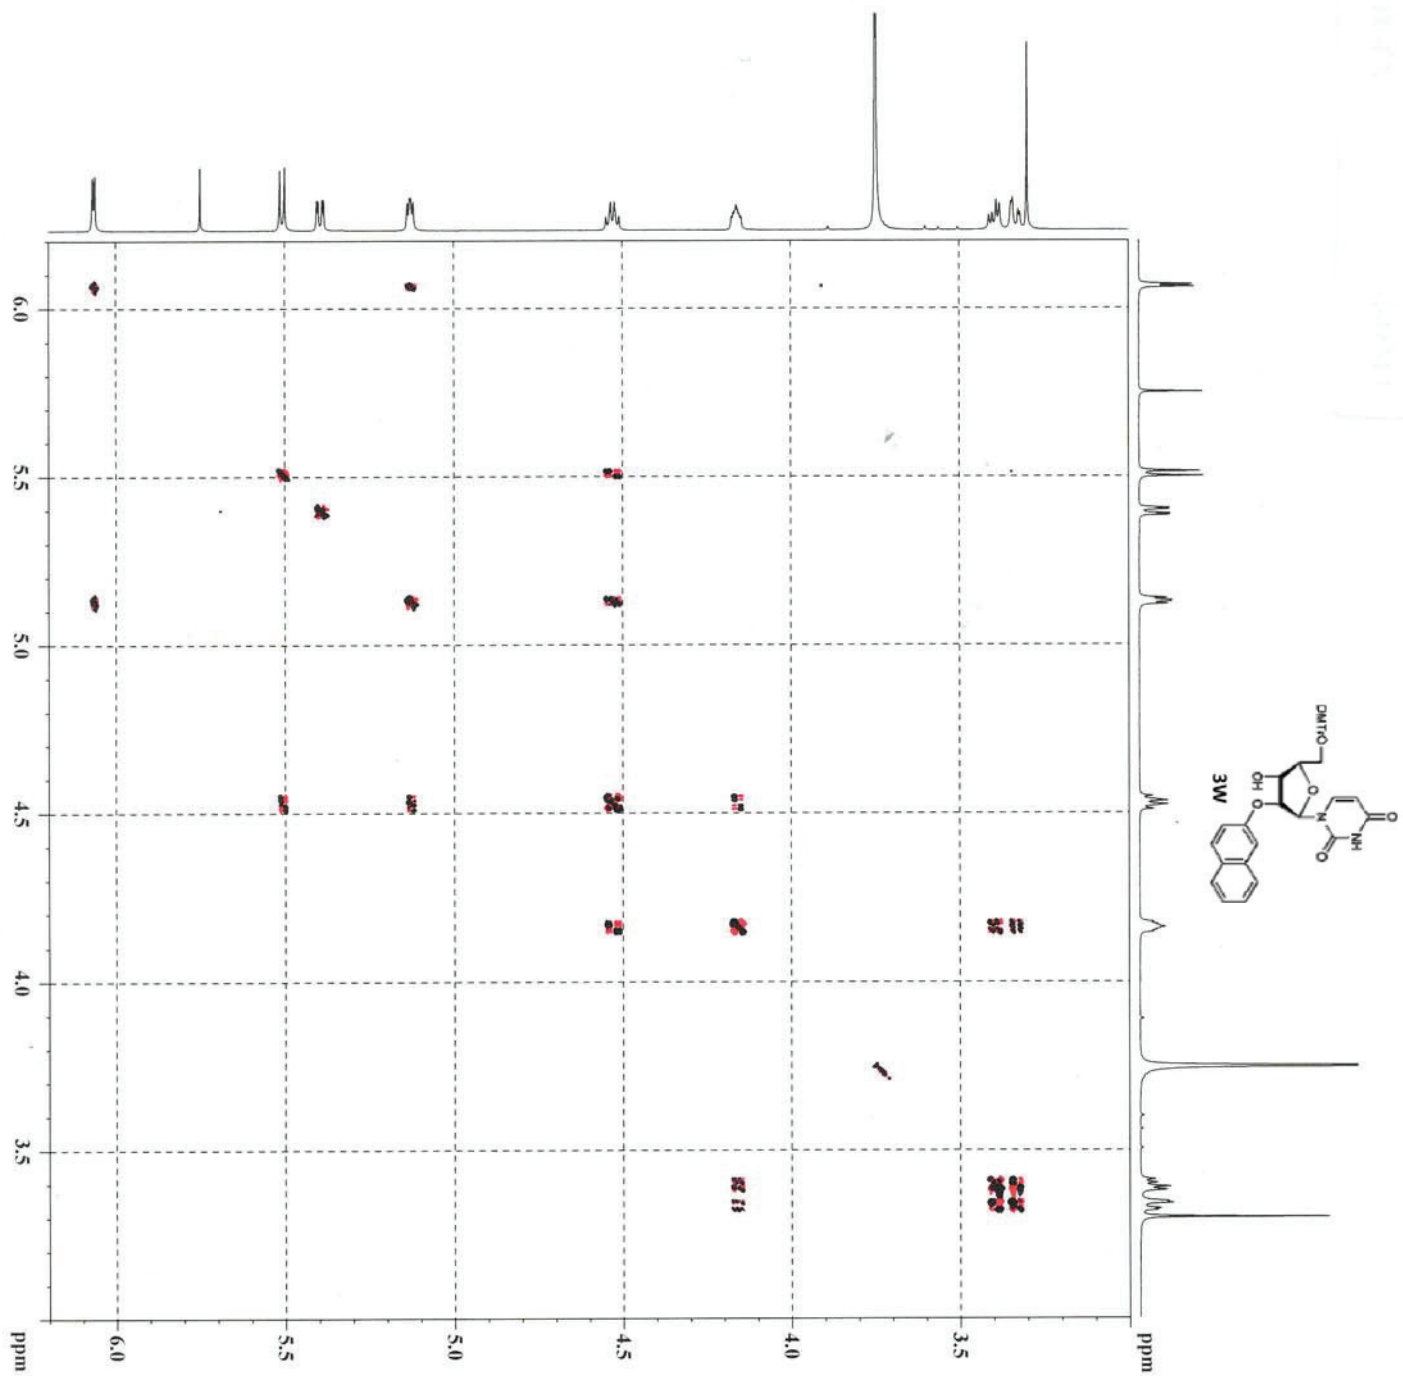

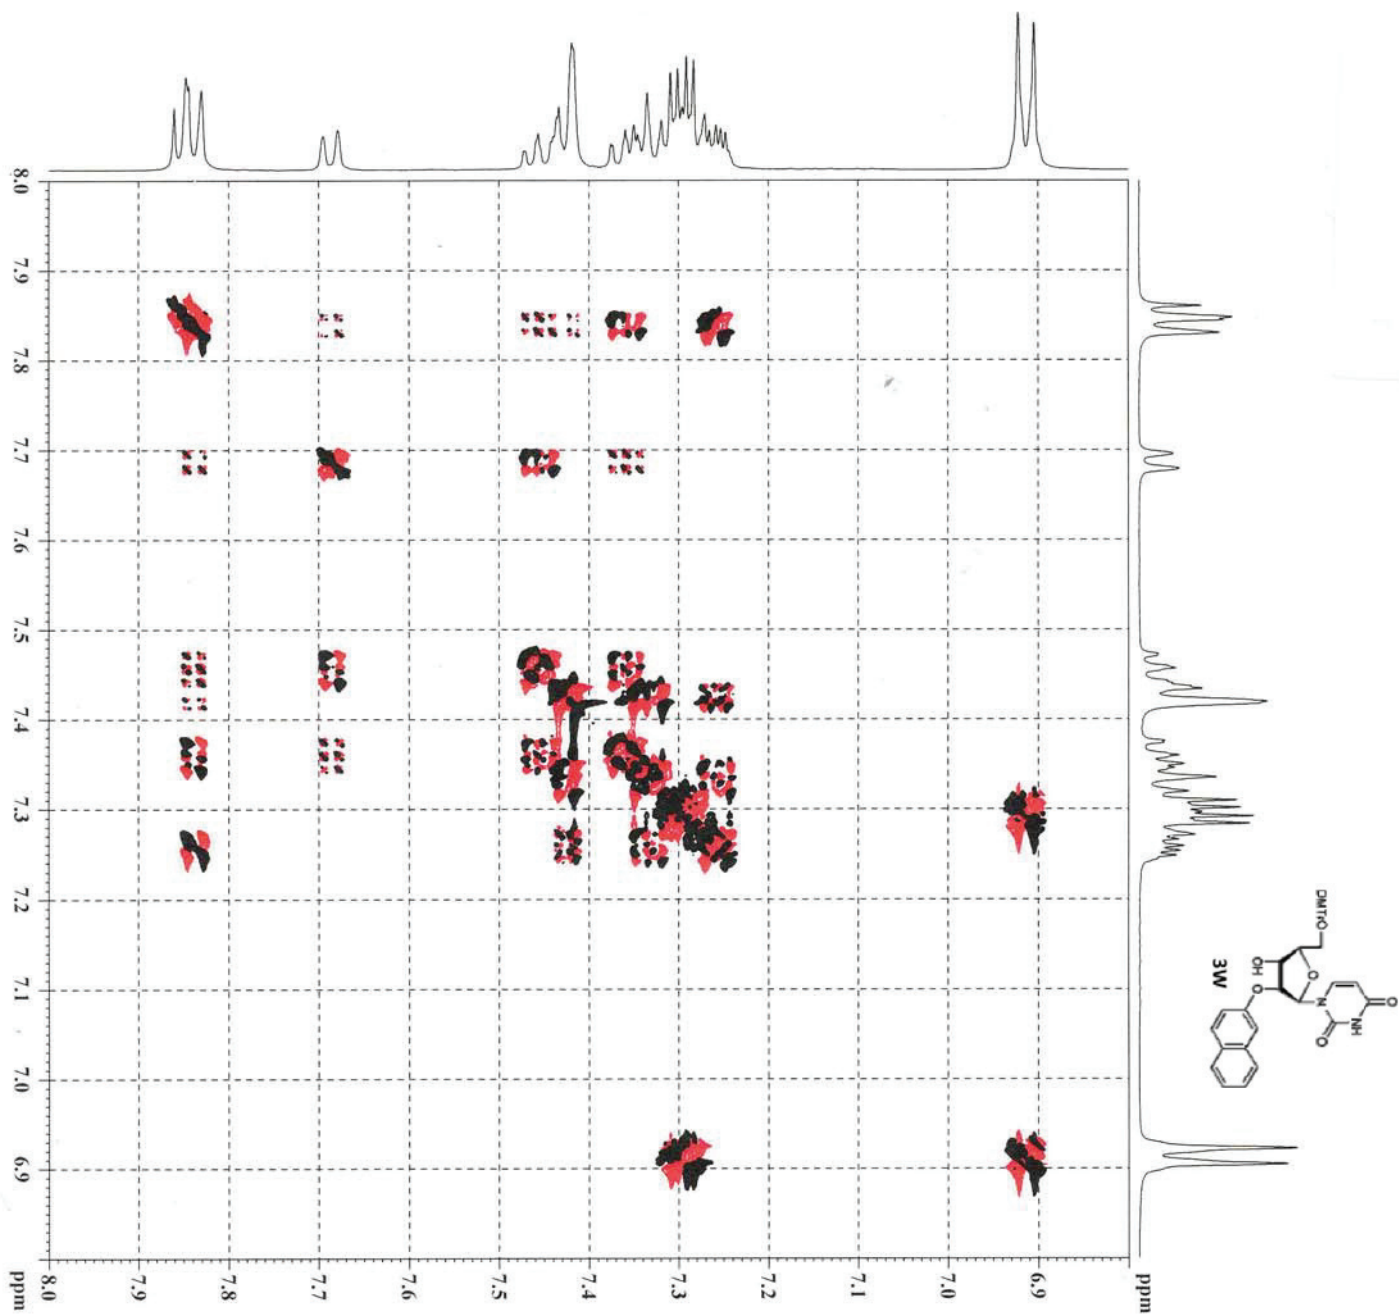



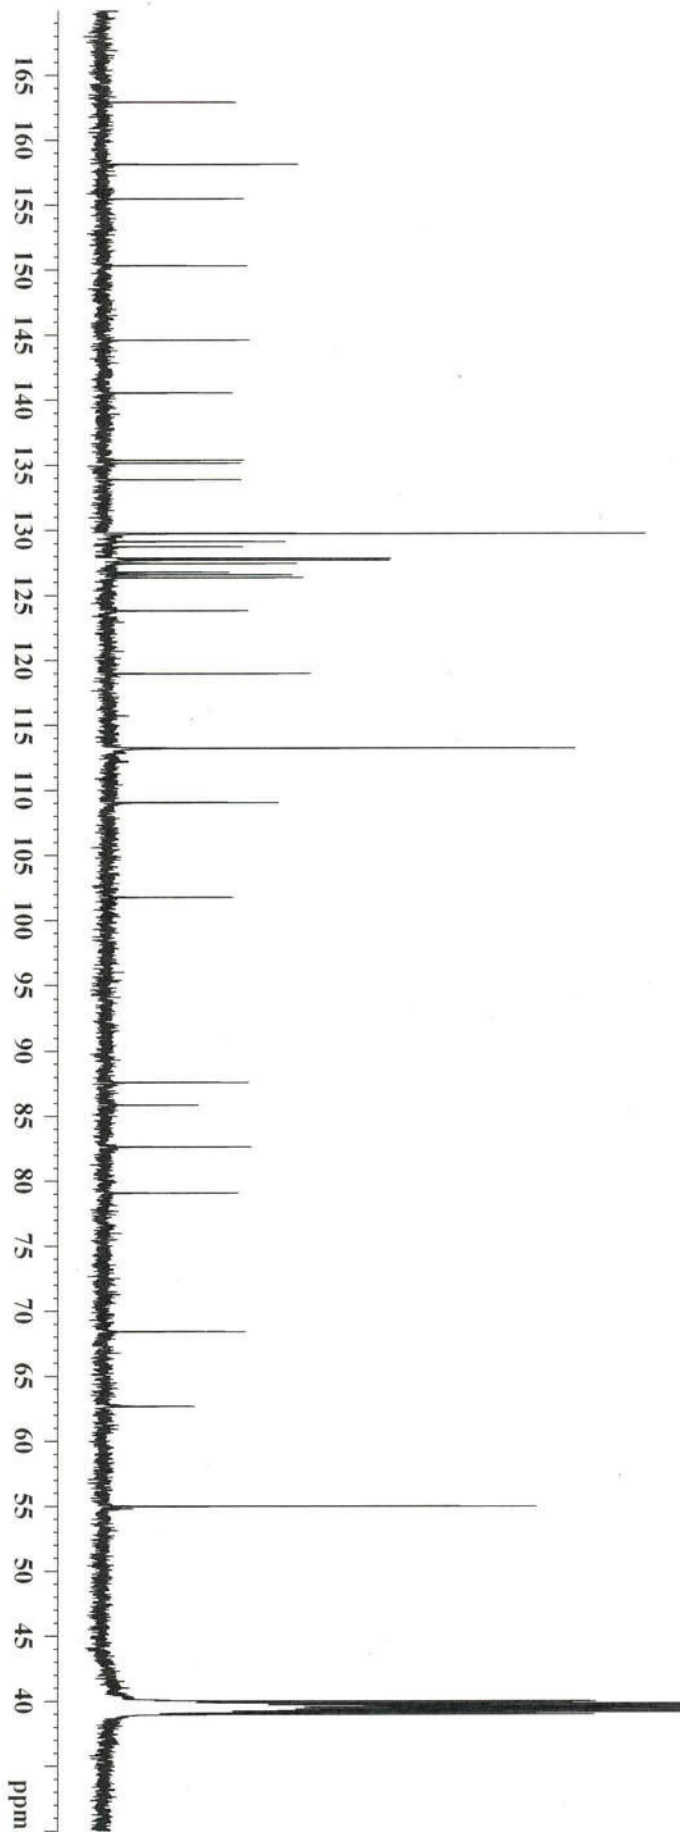

- 162.917
- 158.130
- 155.483
- 150.334
- 144.615
- 140.550
- 135.382
- 135.153
- 133.902
- 129.753
- 129.143
- 128.754
- 127.858
- 127.719
- 127.452
- 126.770
- 126.580
- 126.361
- 123.818
- 118.978
- 113.235
- 109.055
- 101.780
- 87.595
- 85.857
- 82.643
- 79.086
- 68.450
- 62.694
- 55.016
- 40.024
- 39.856
- 39.690
- 39.523
- 39.356
- 39.189
- 39.022

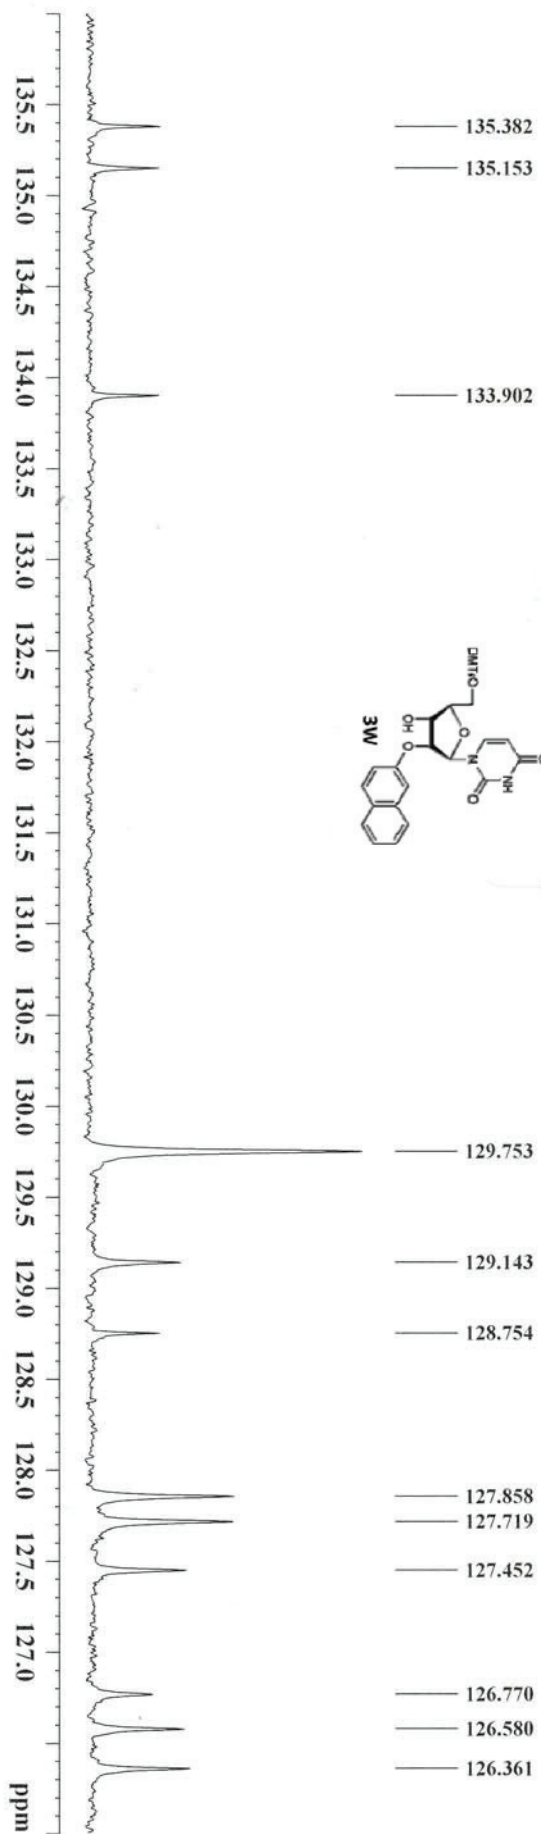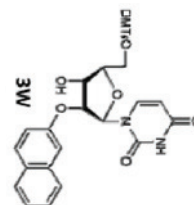

- 135.382
- 135.153
- 133.902
- 129.753
- 129.143
- 128.754
- 127.858
- 127.719
- 127.452
- 126.770
- 126.580
- 126.361

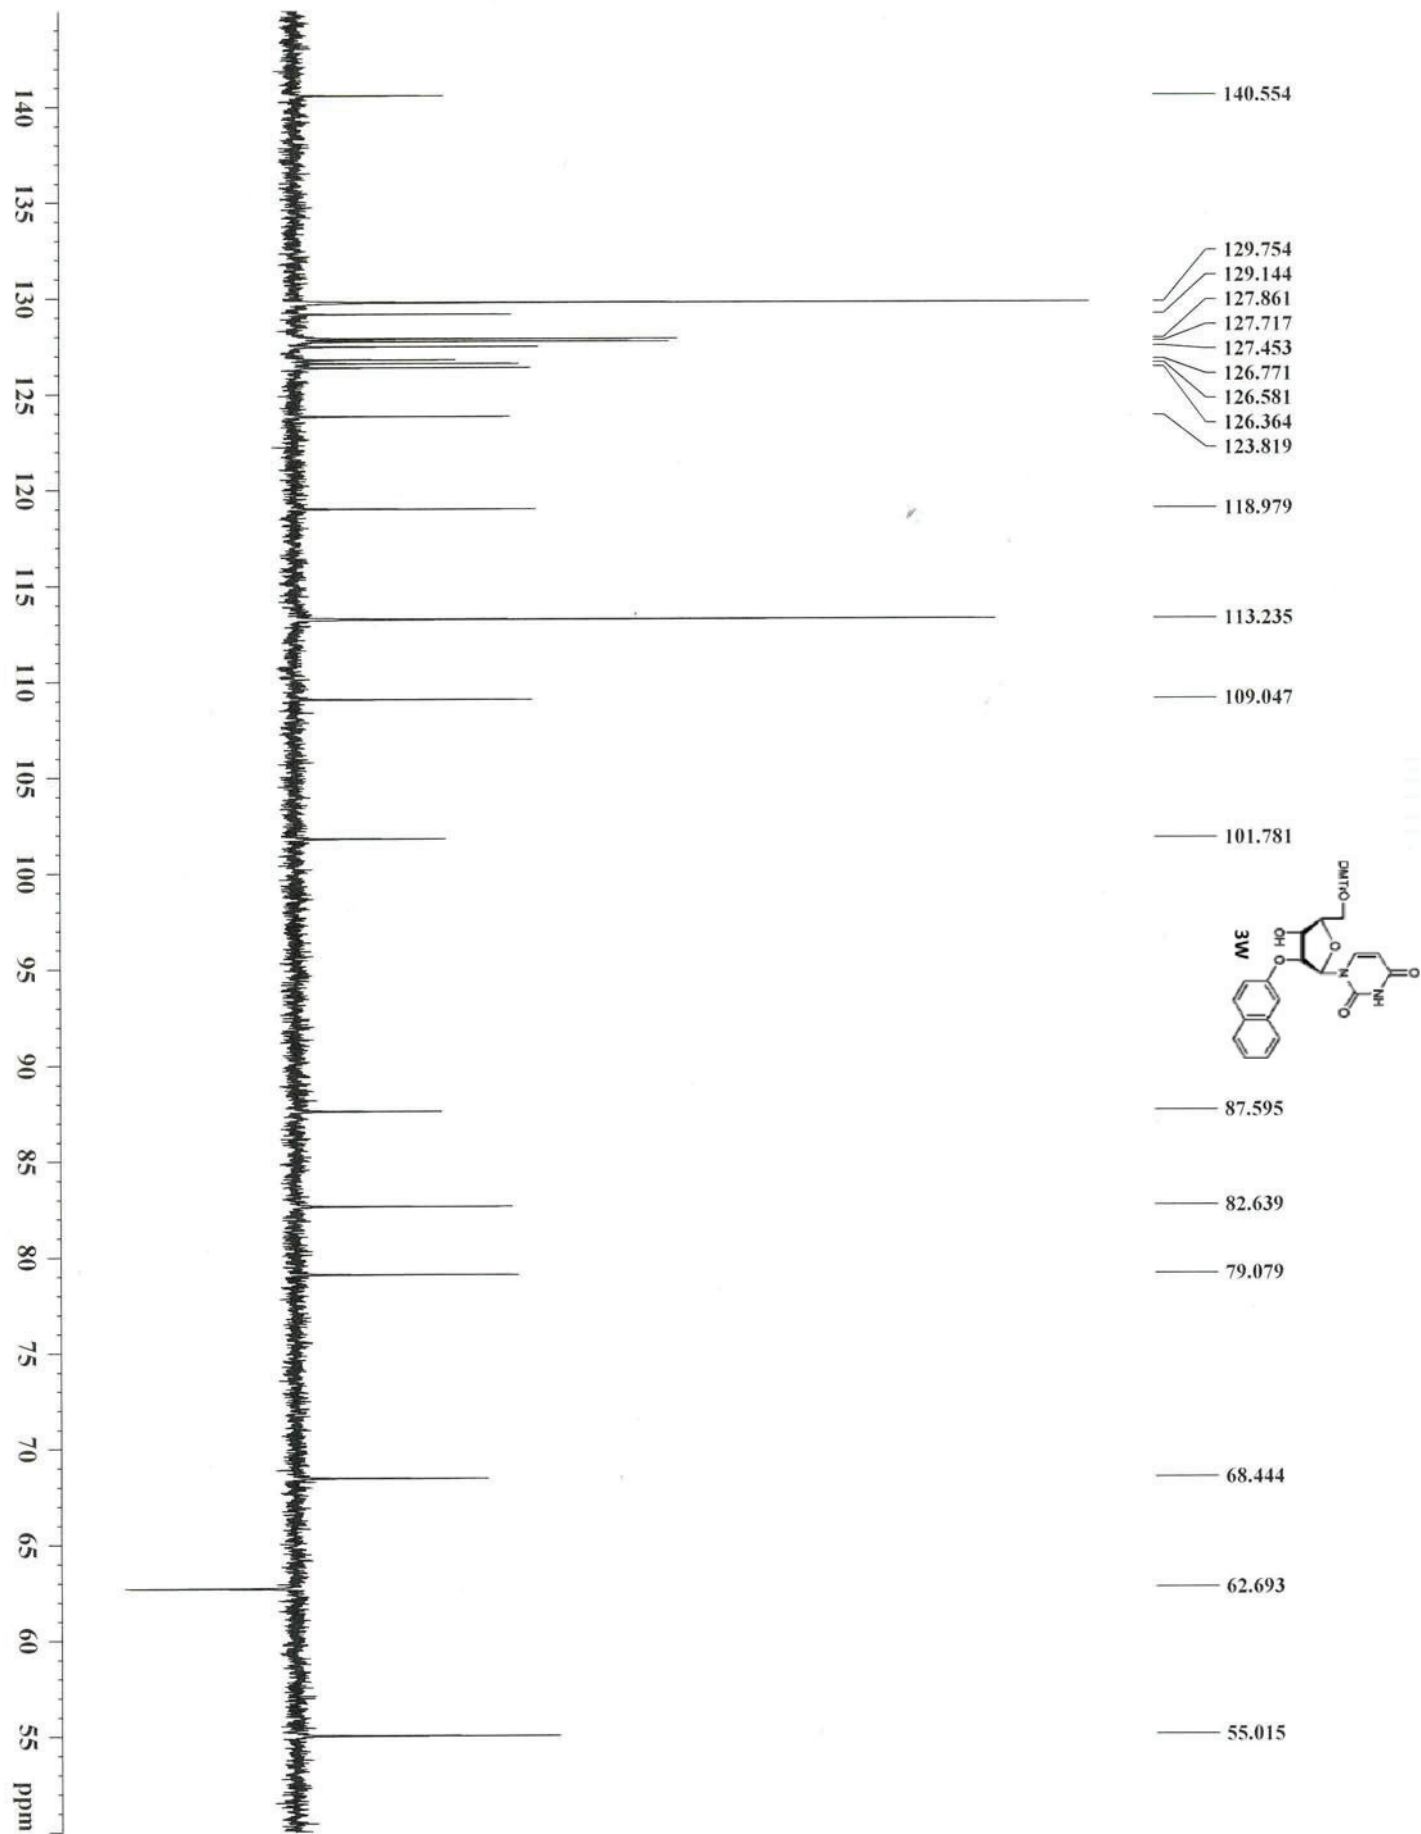

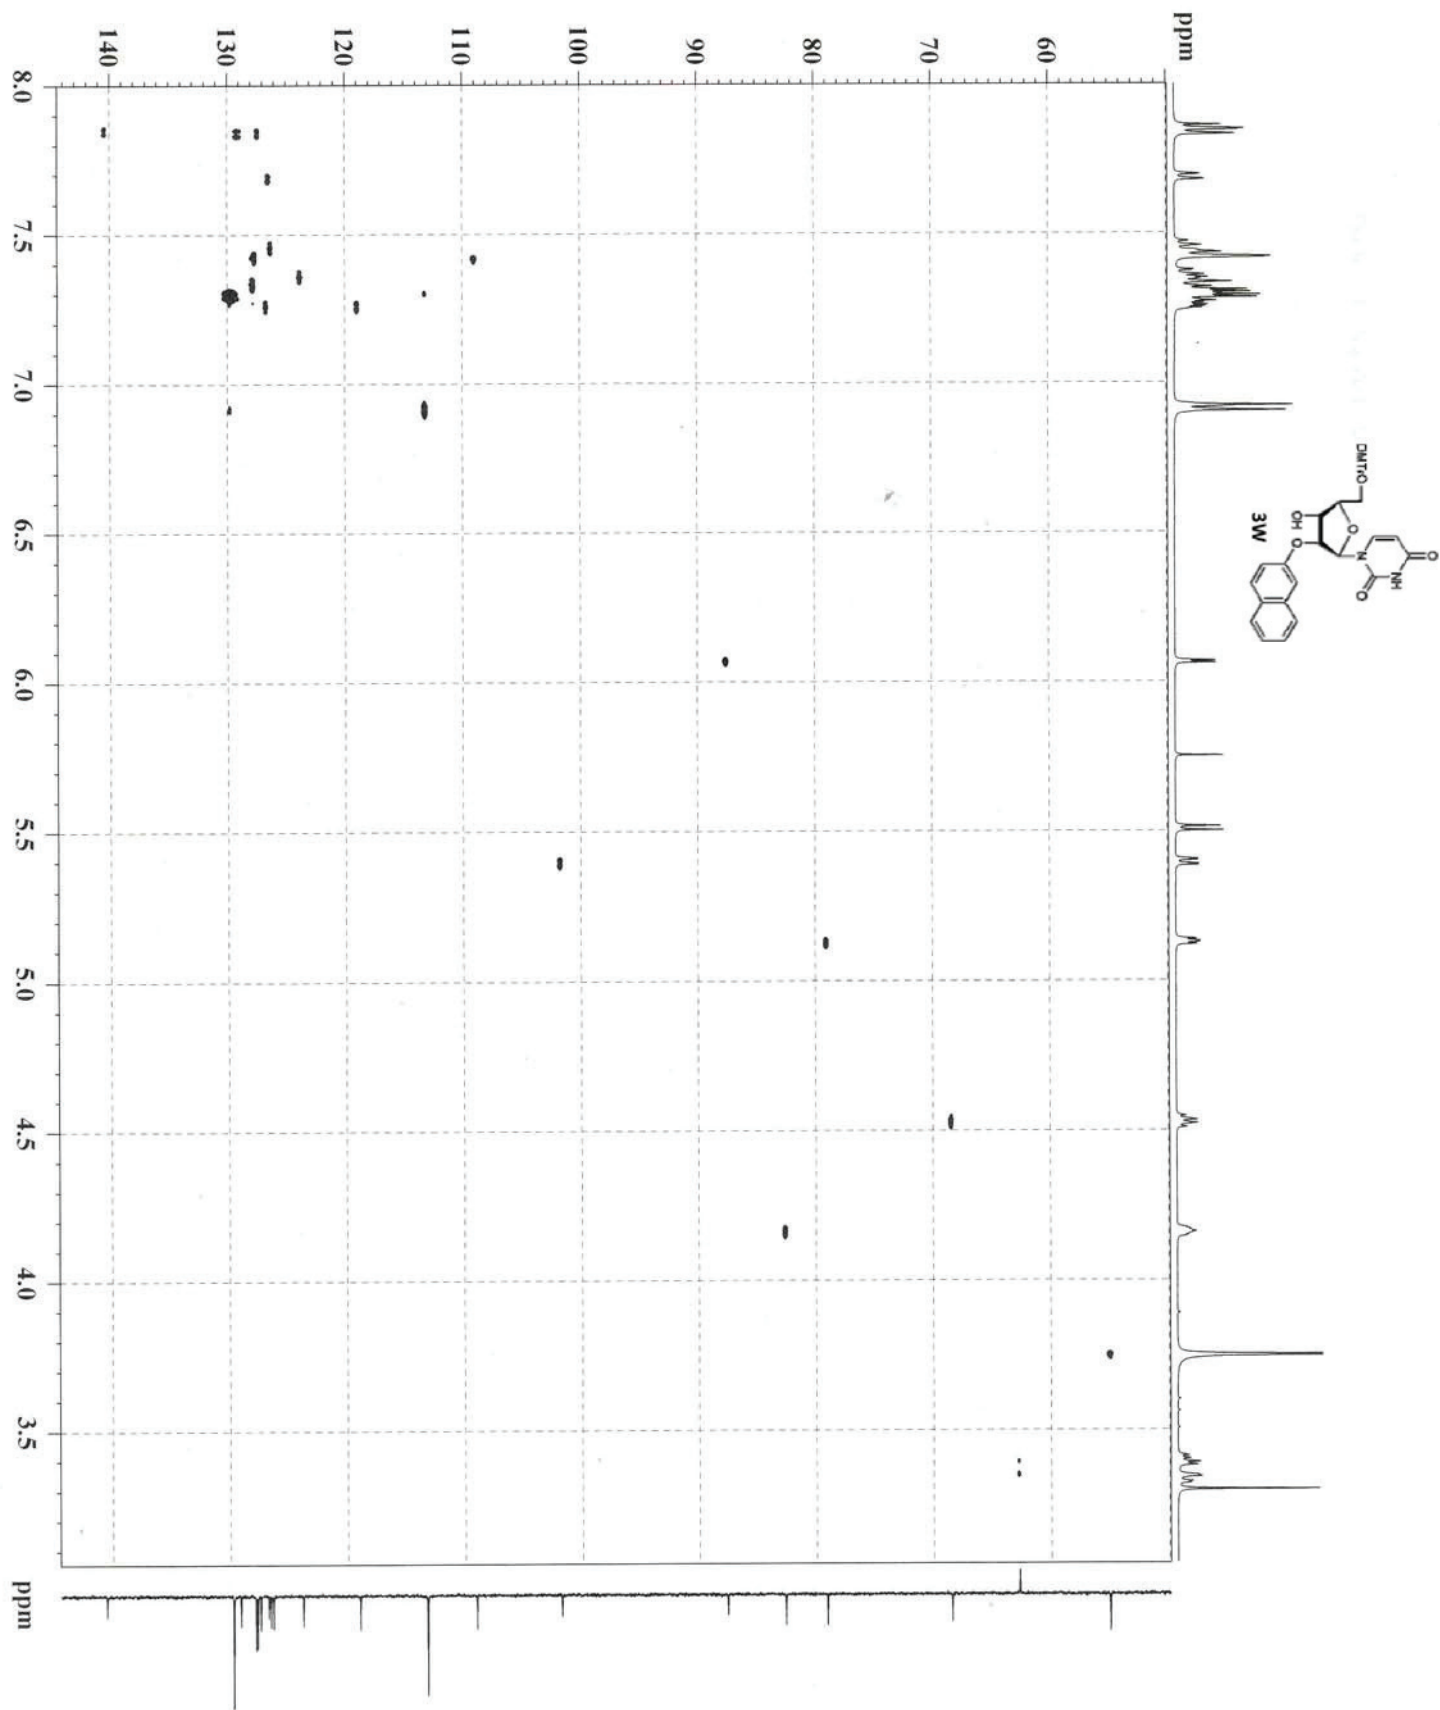

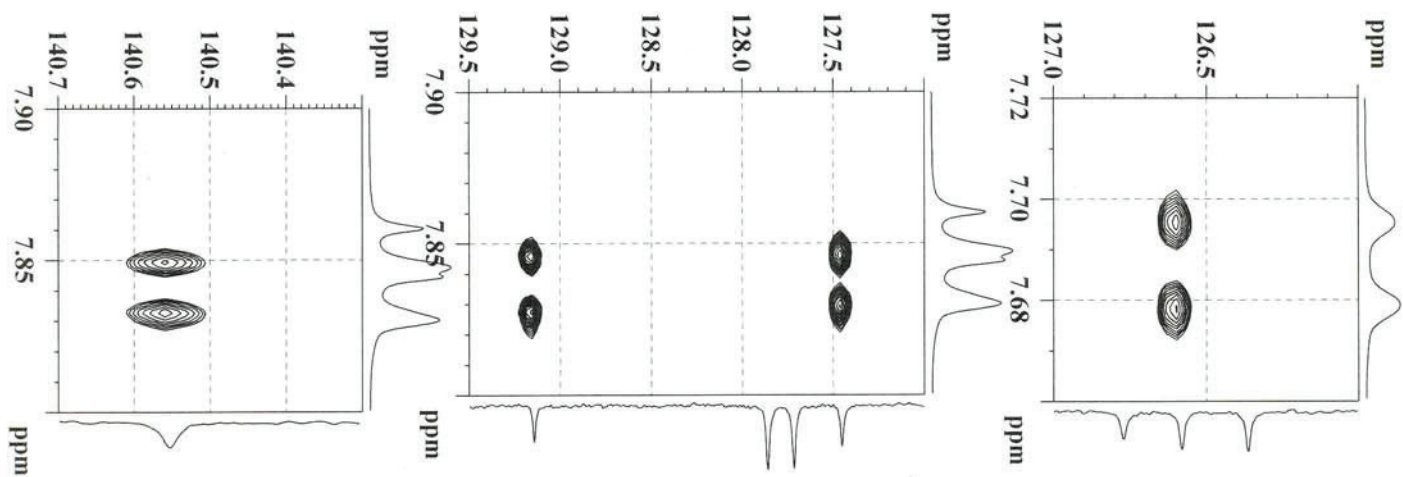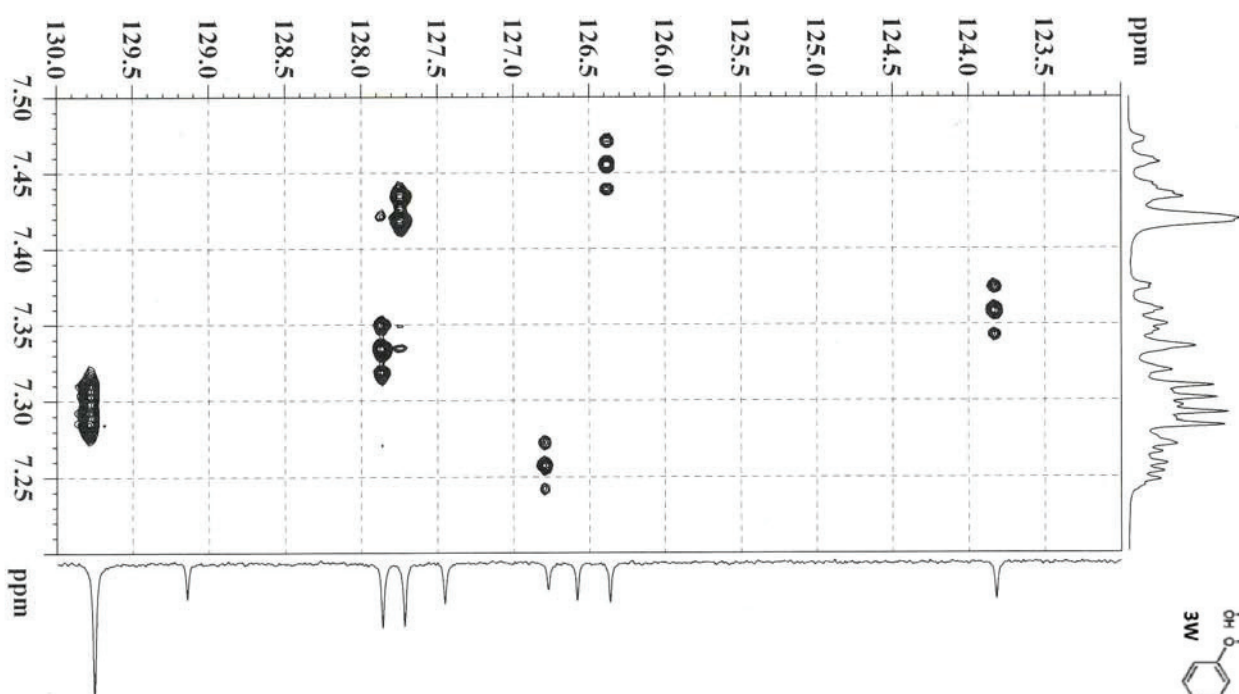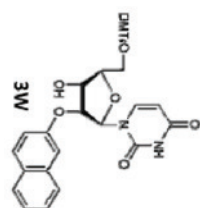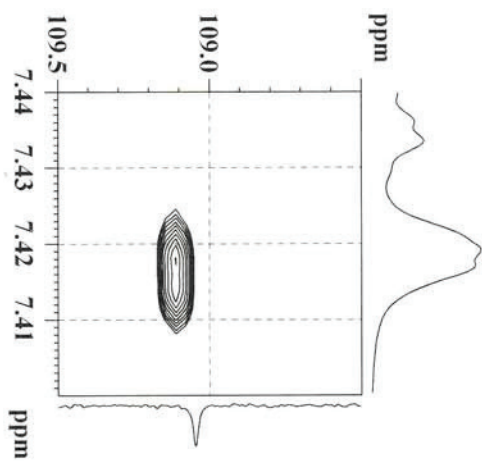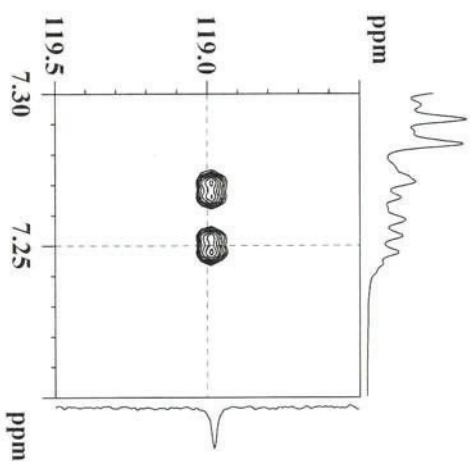



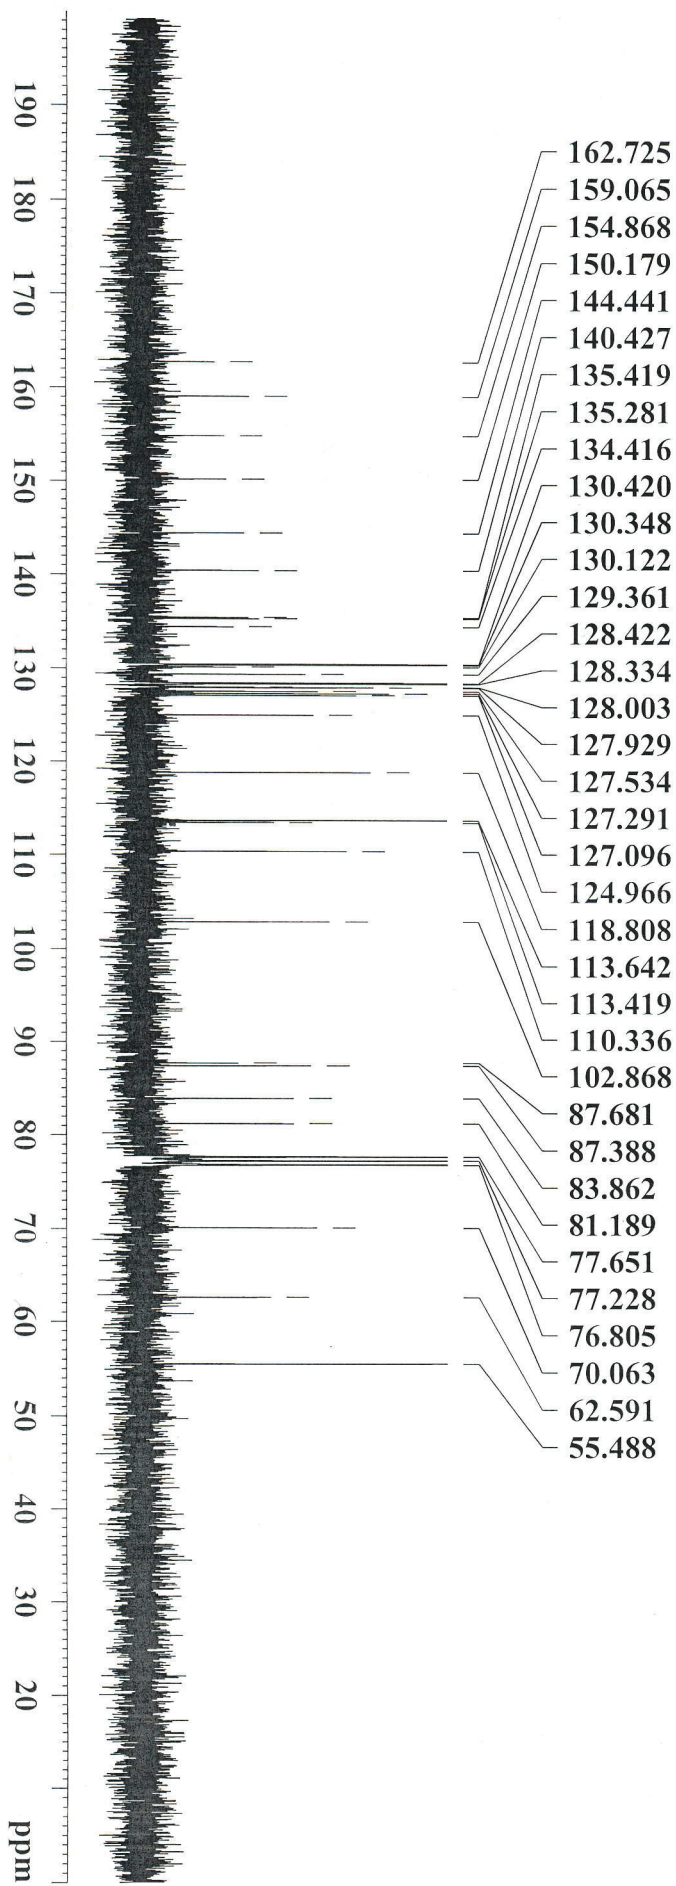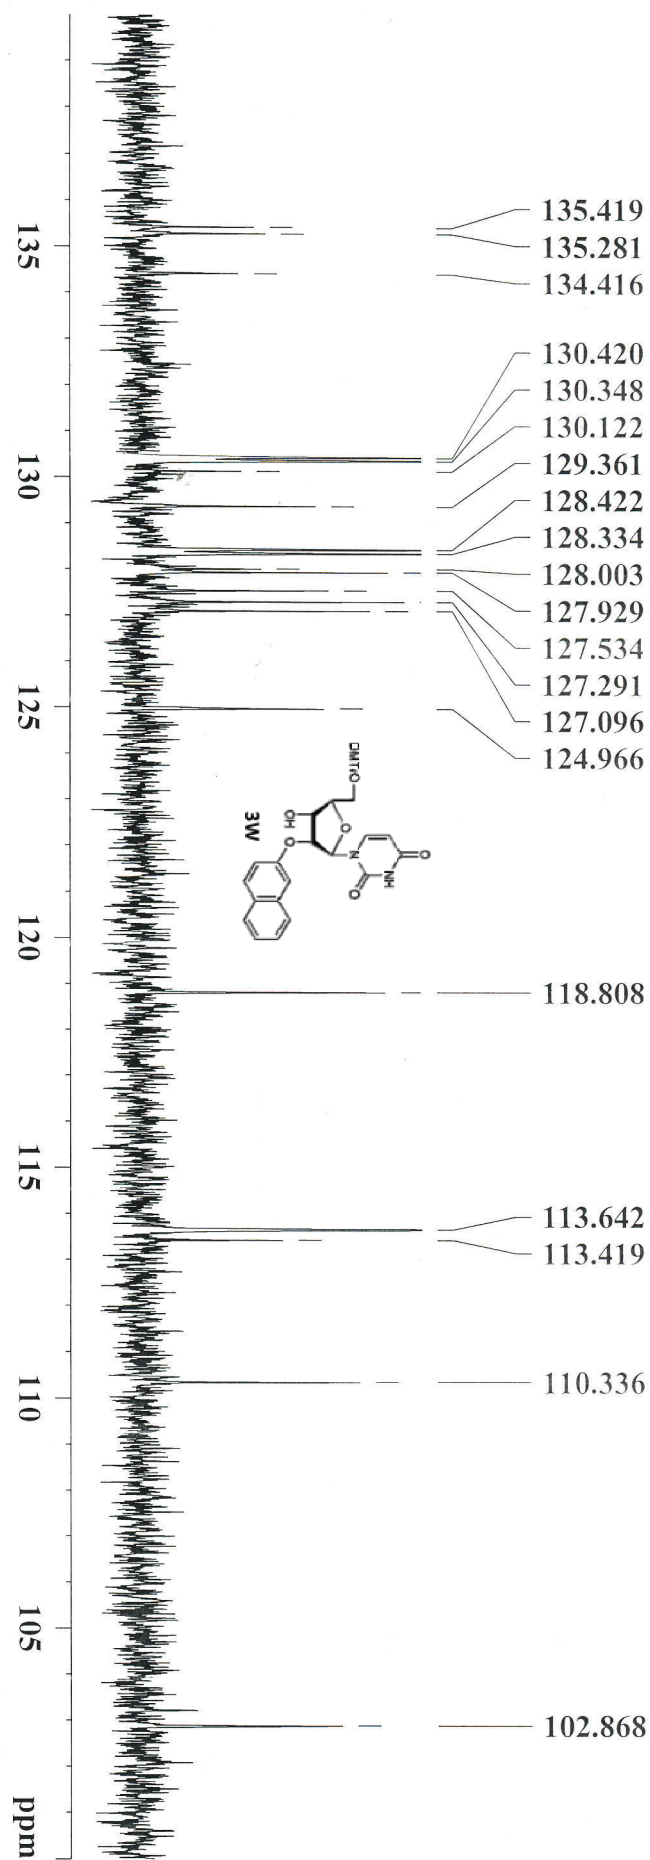

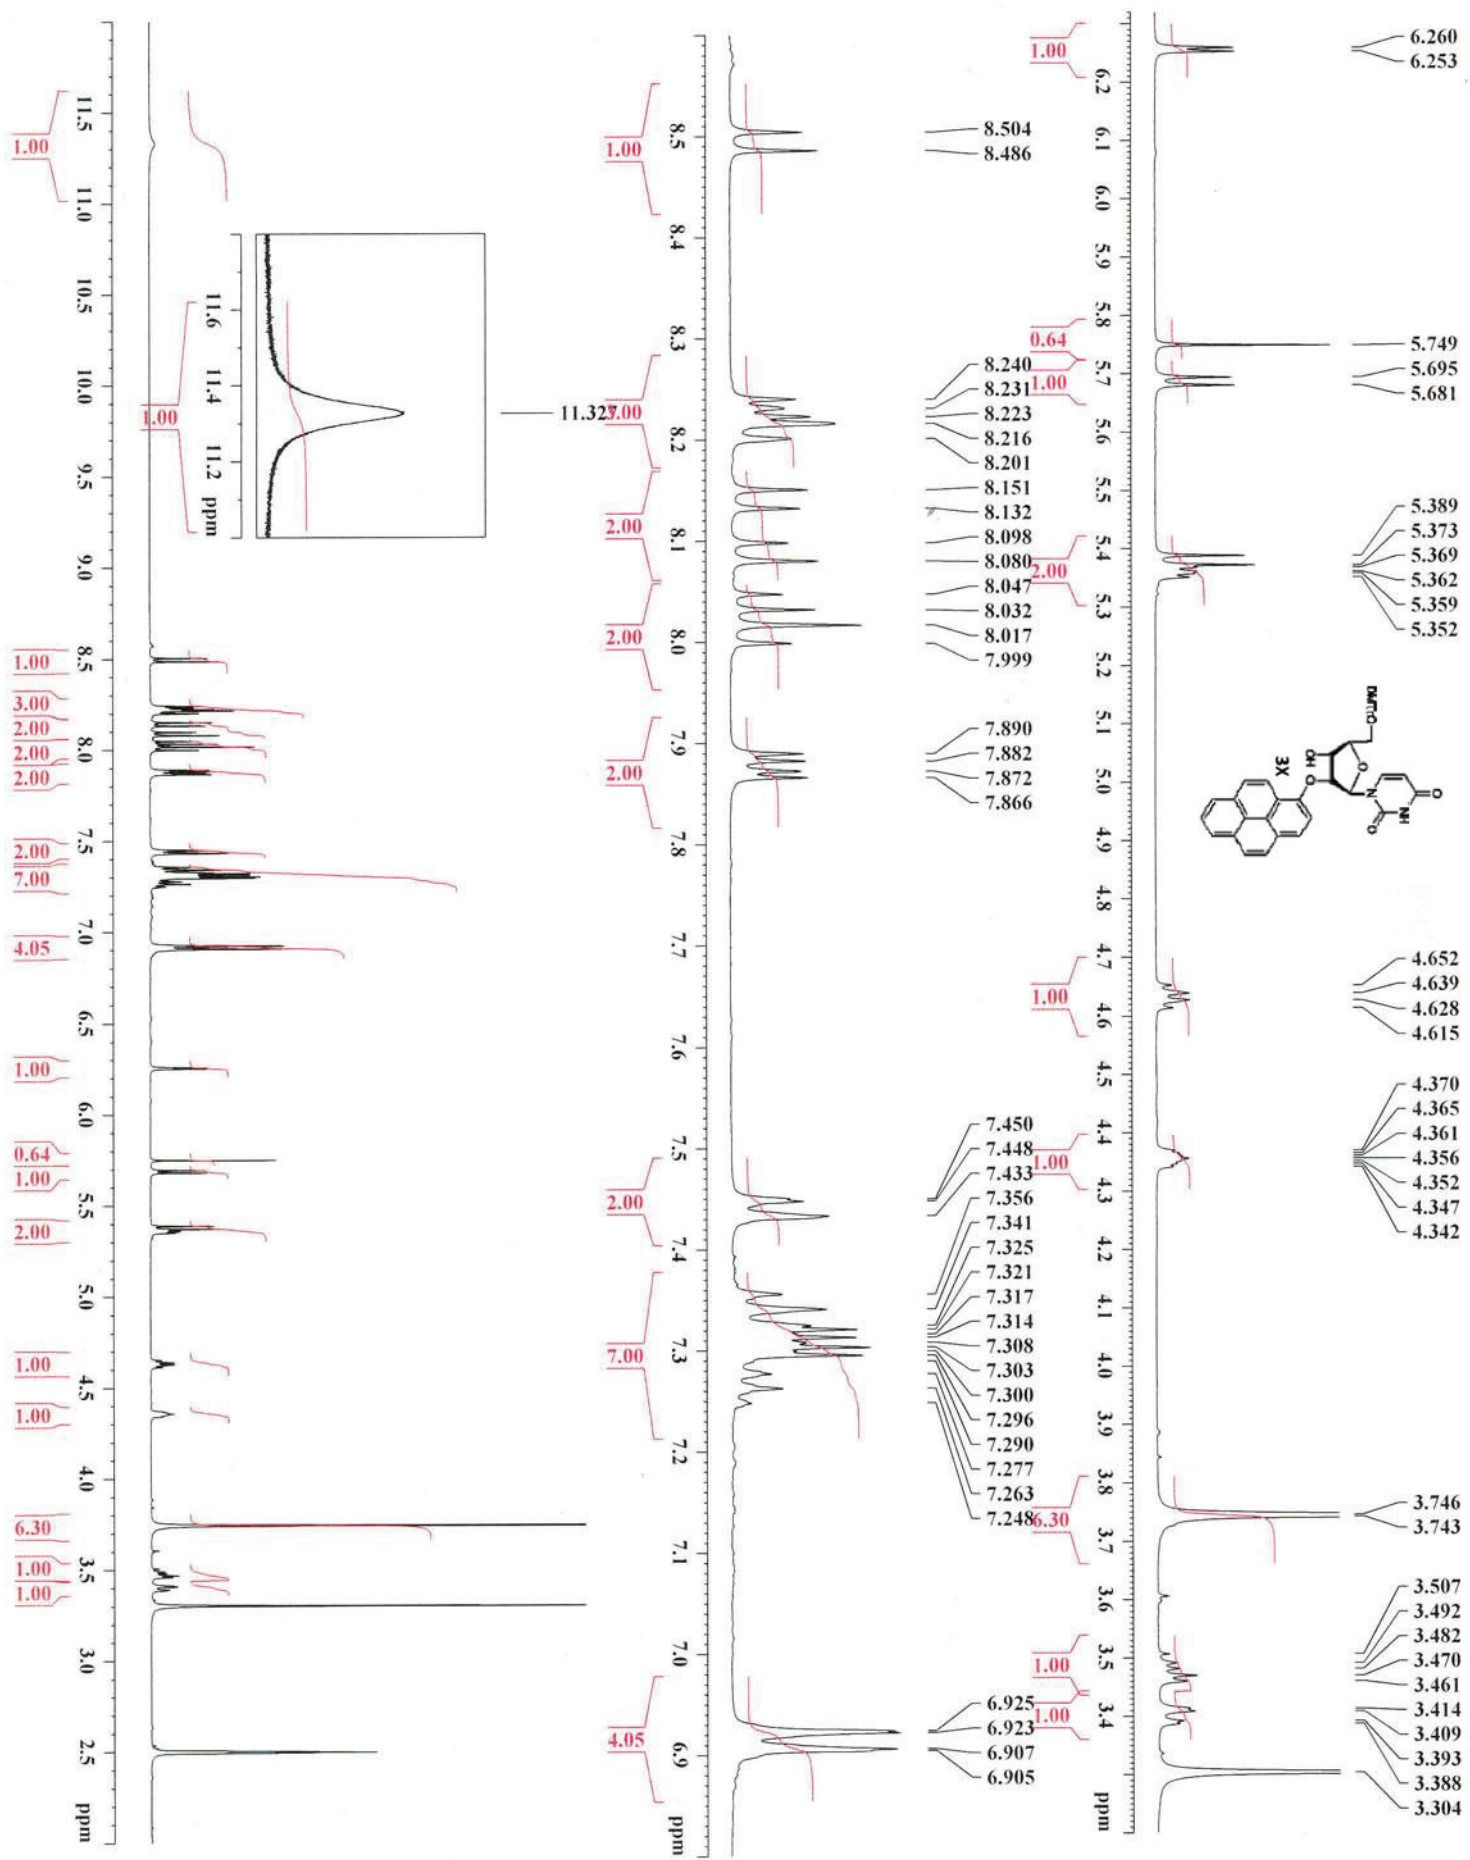

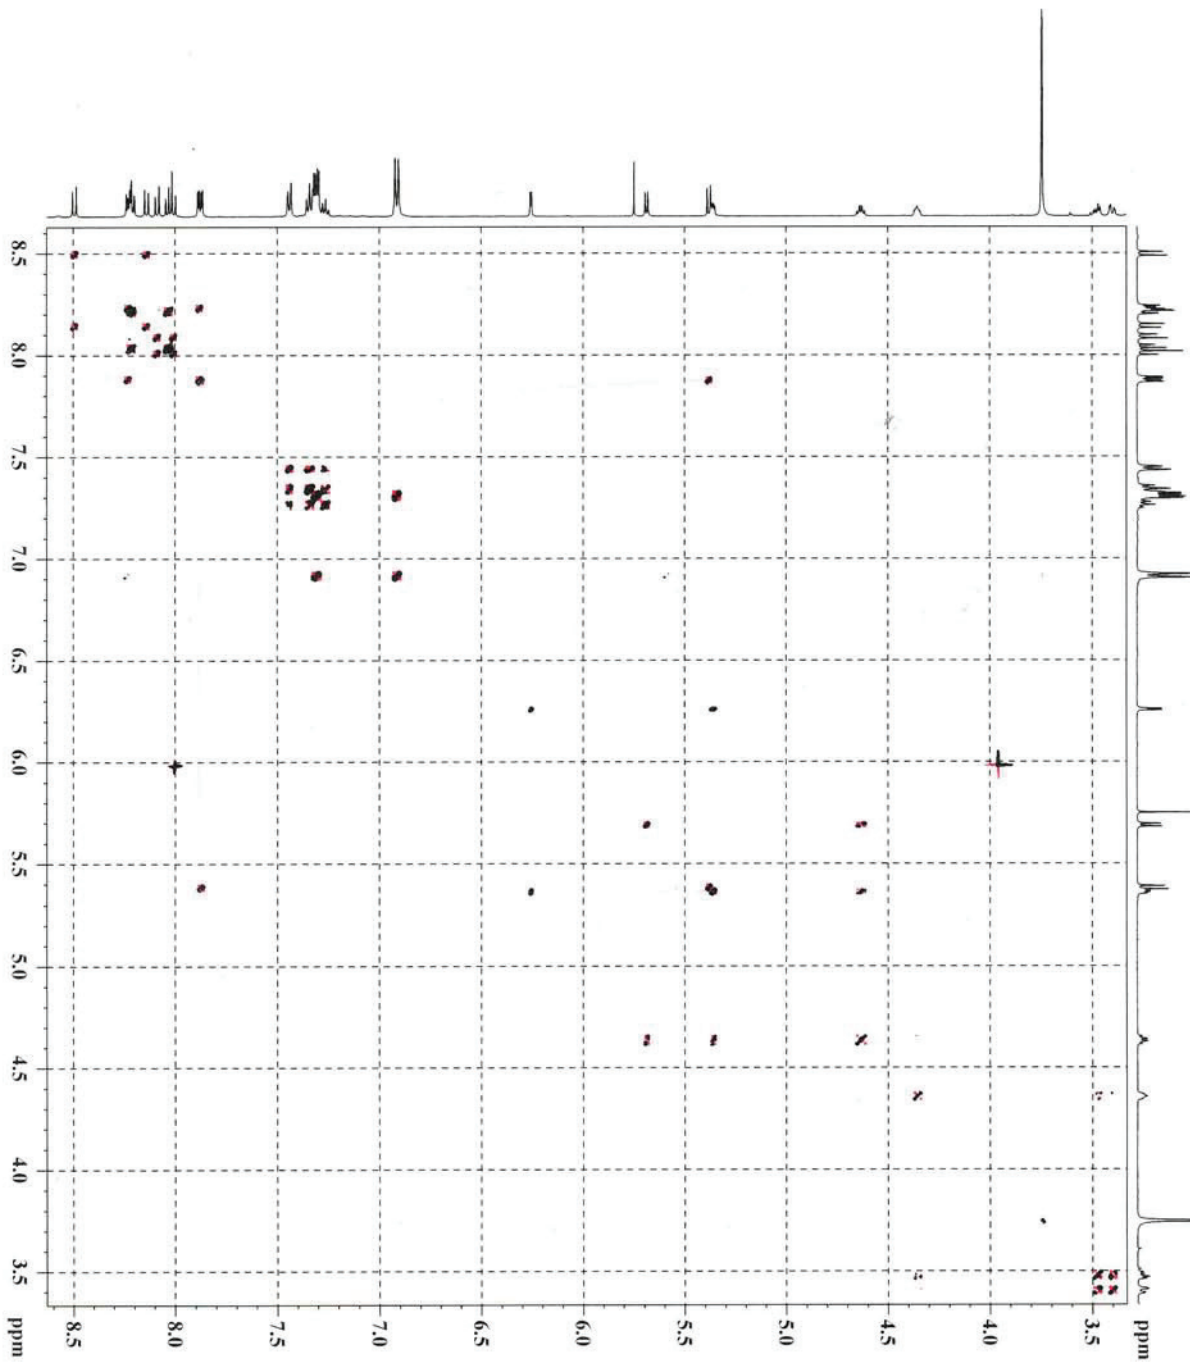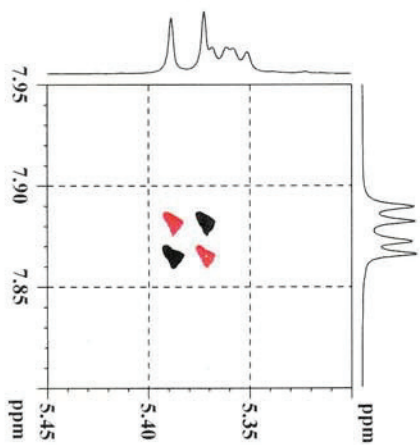



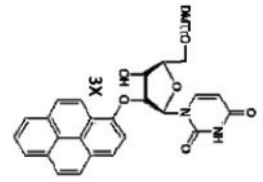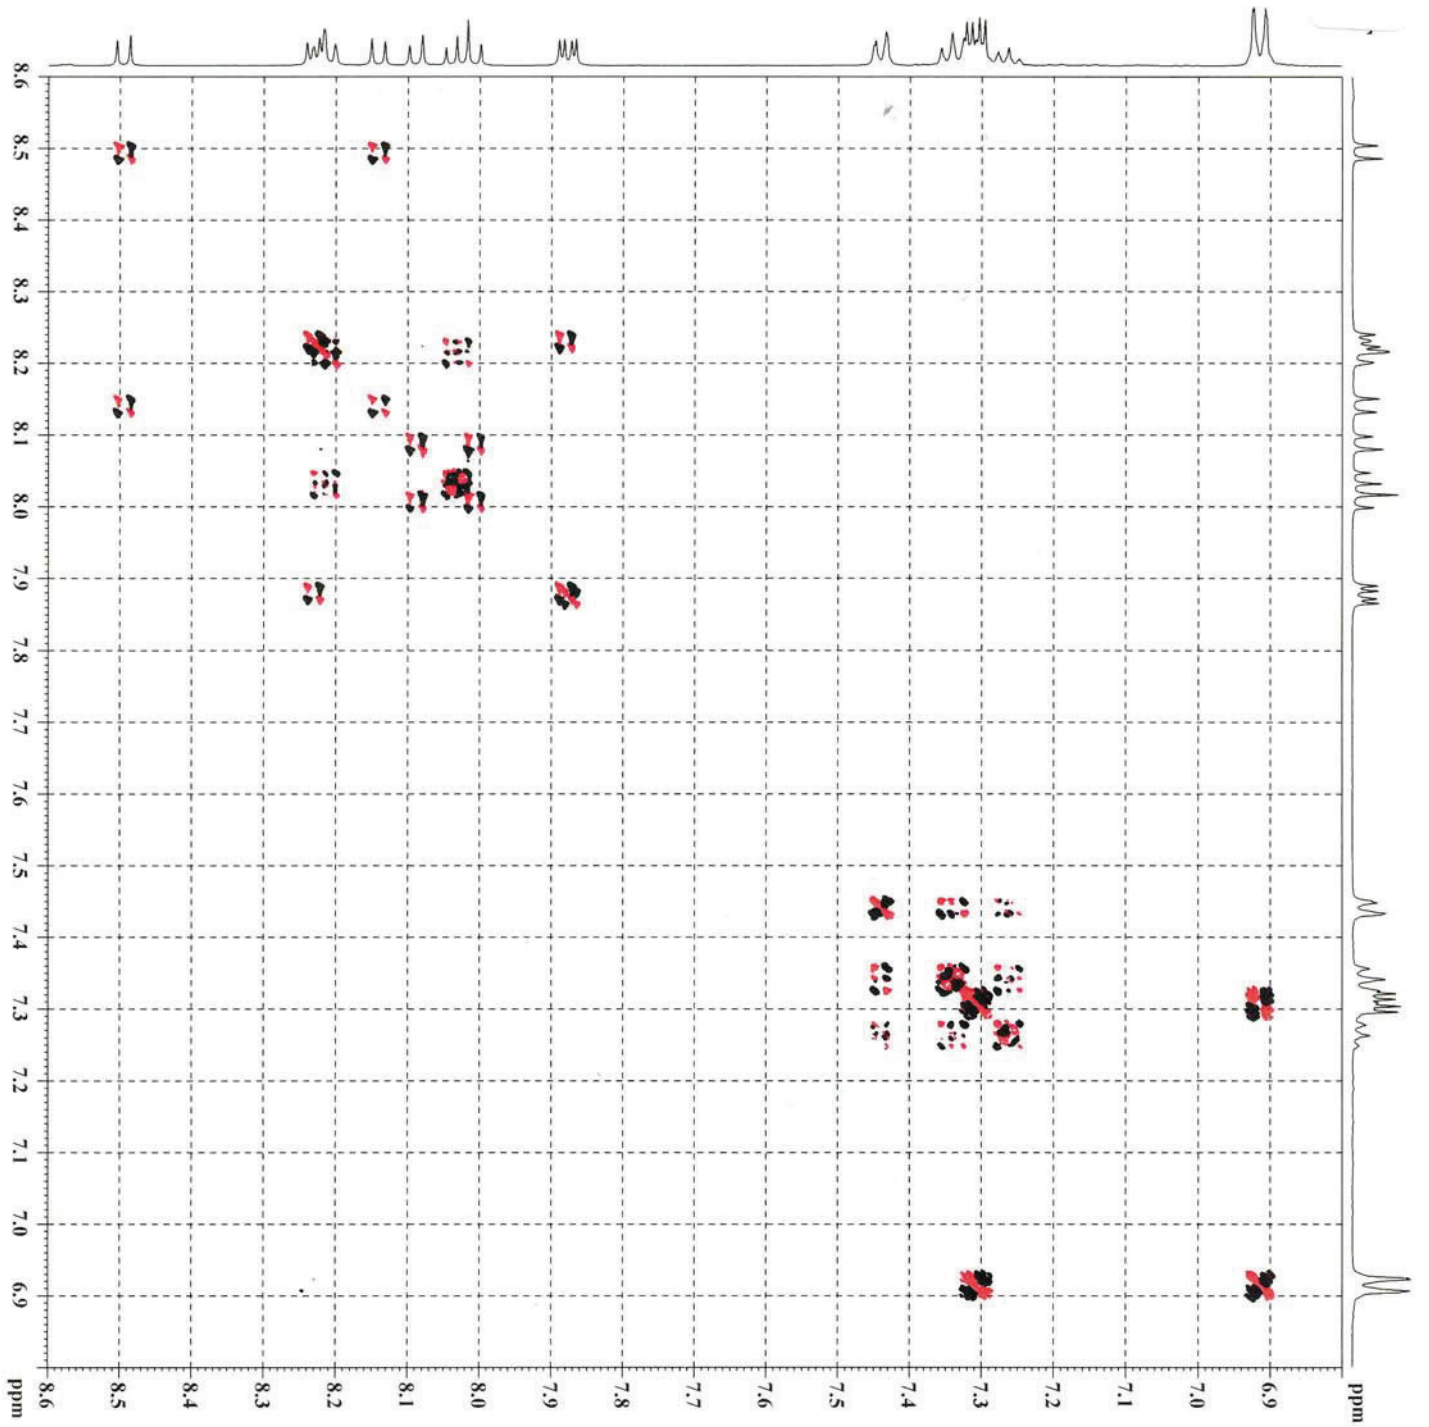



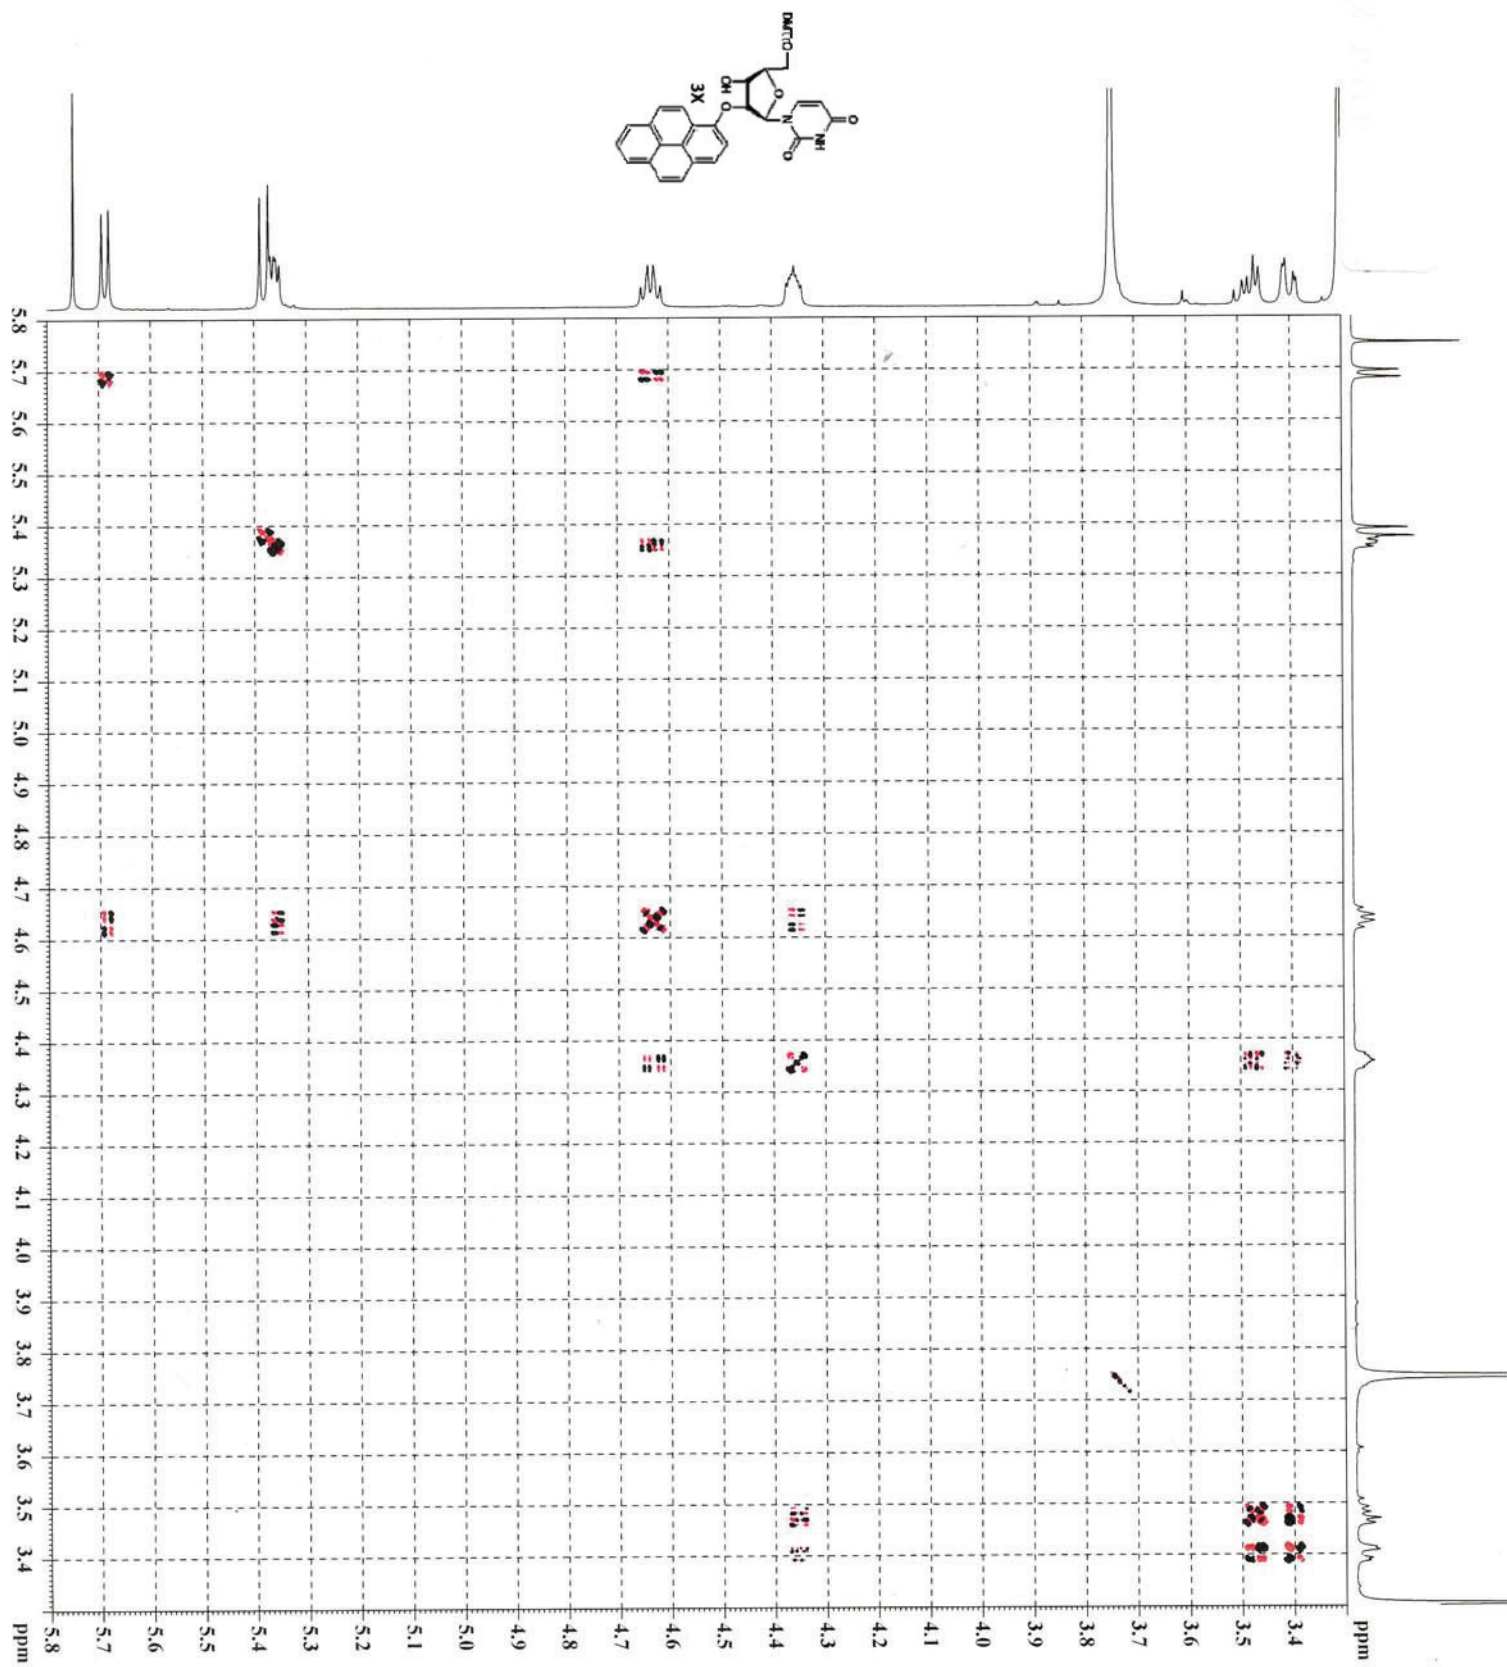

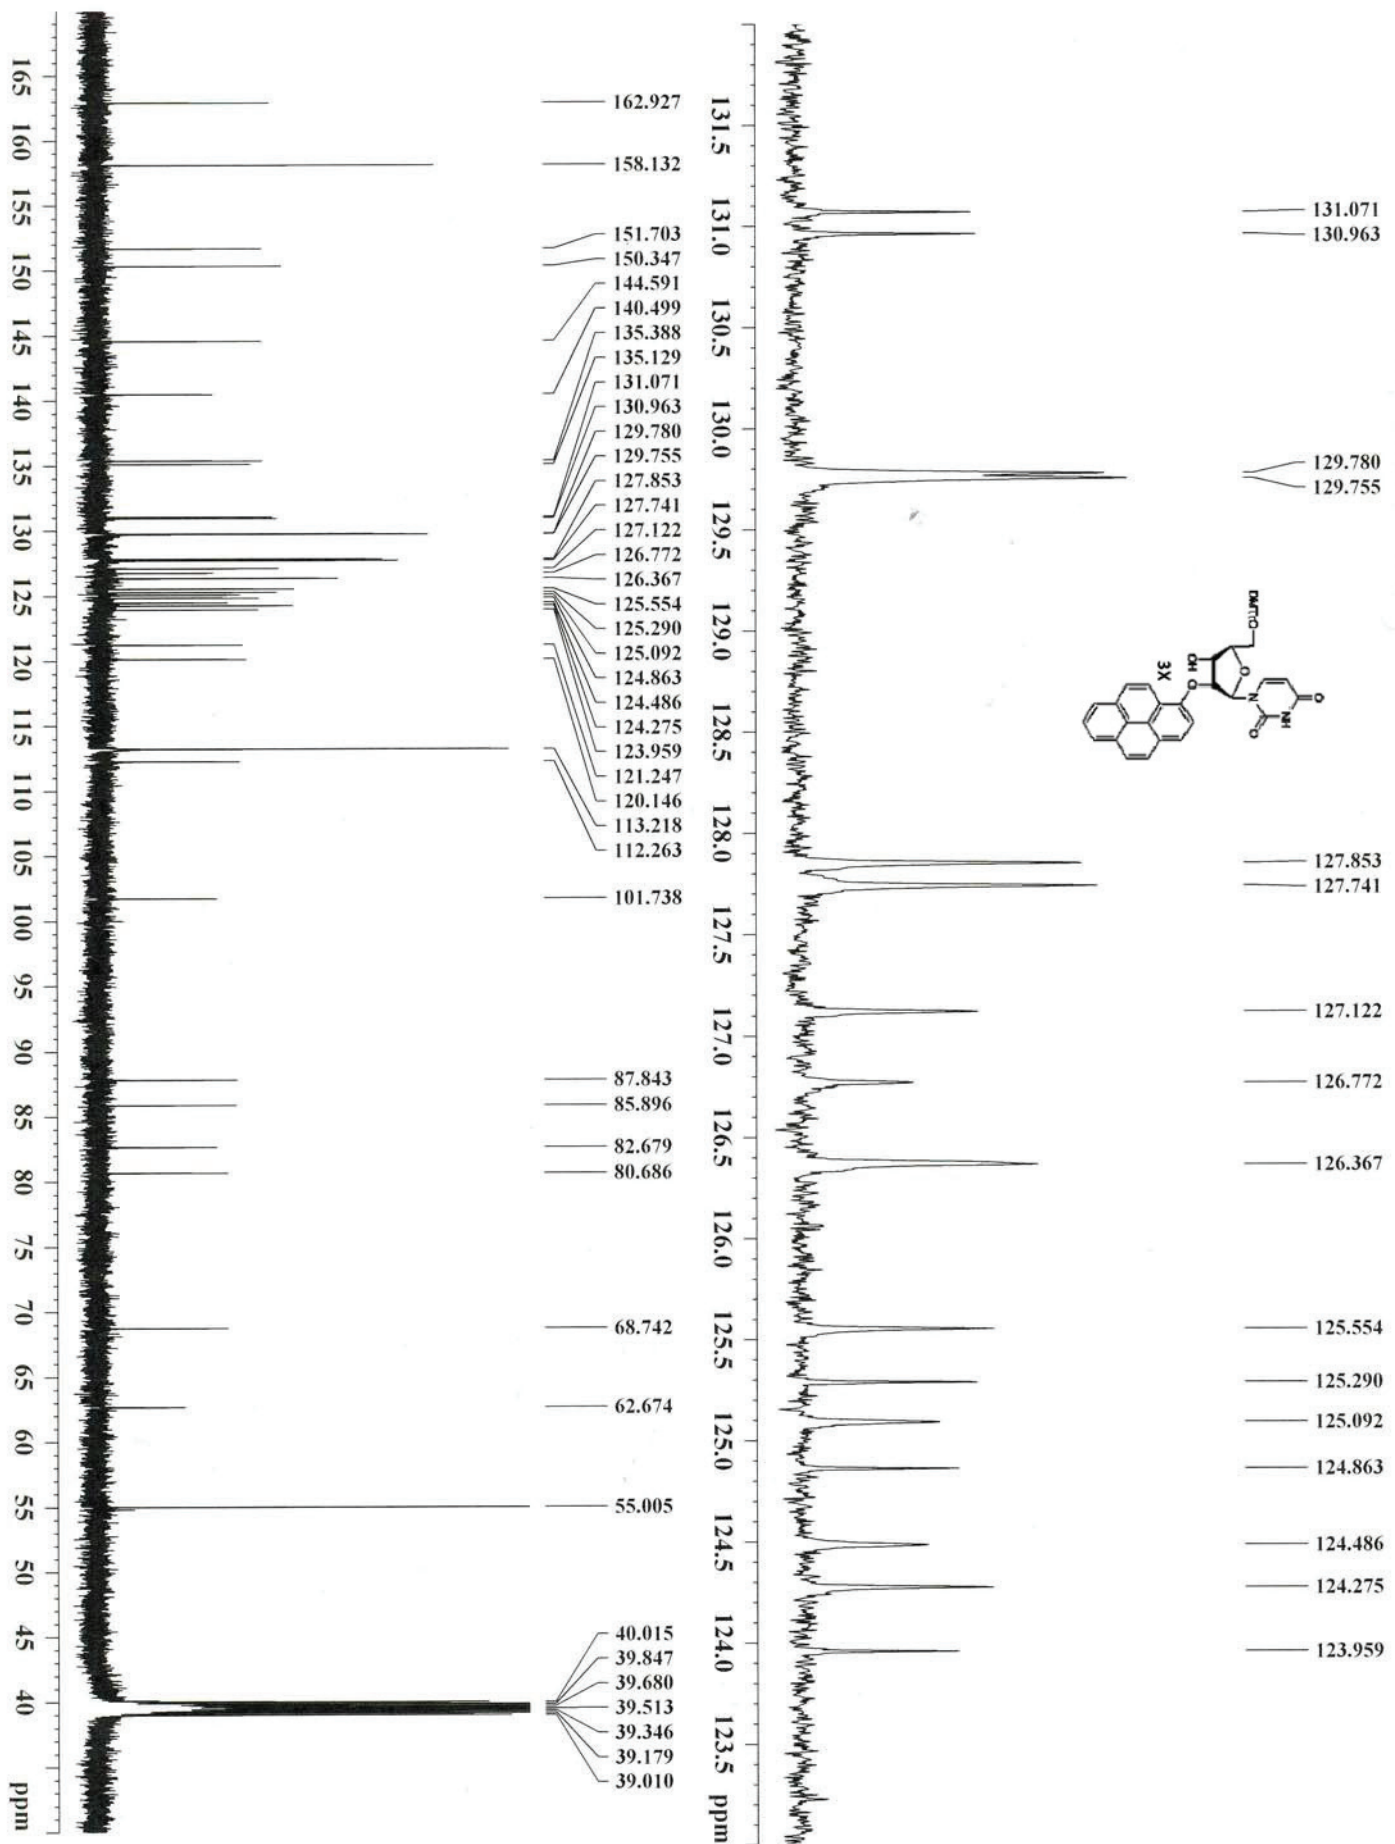

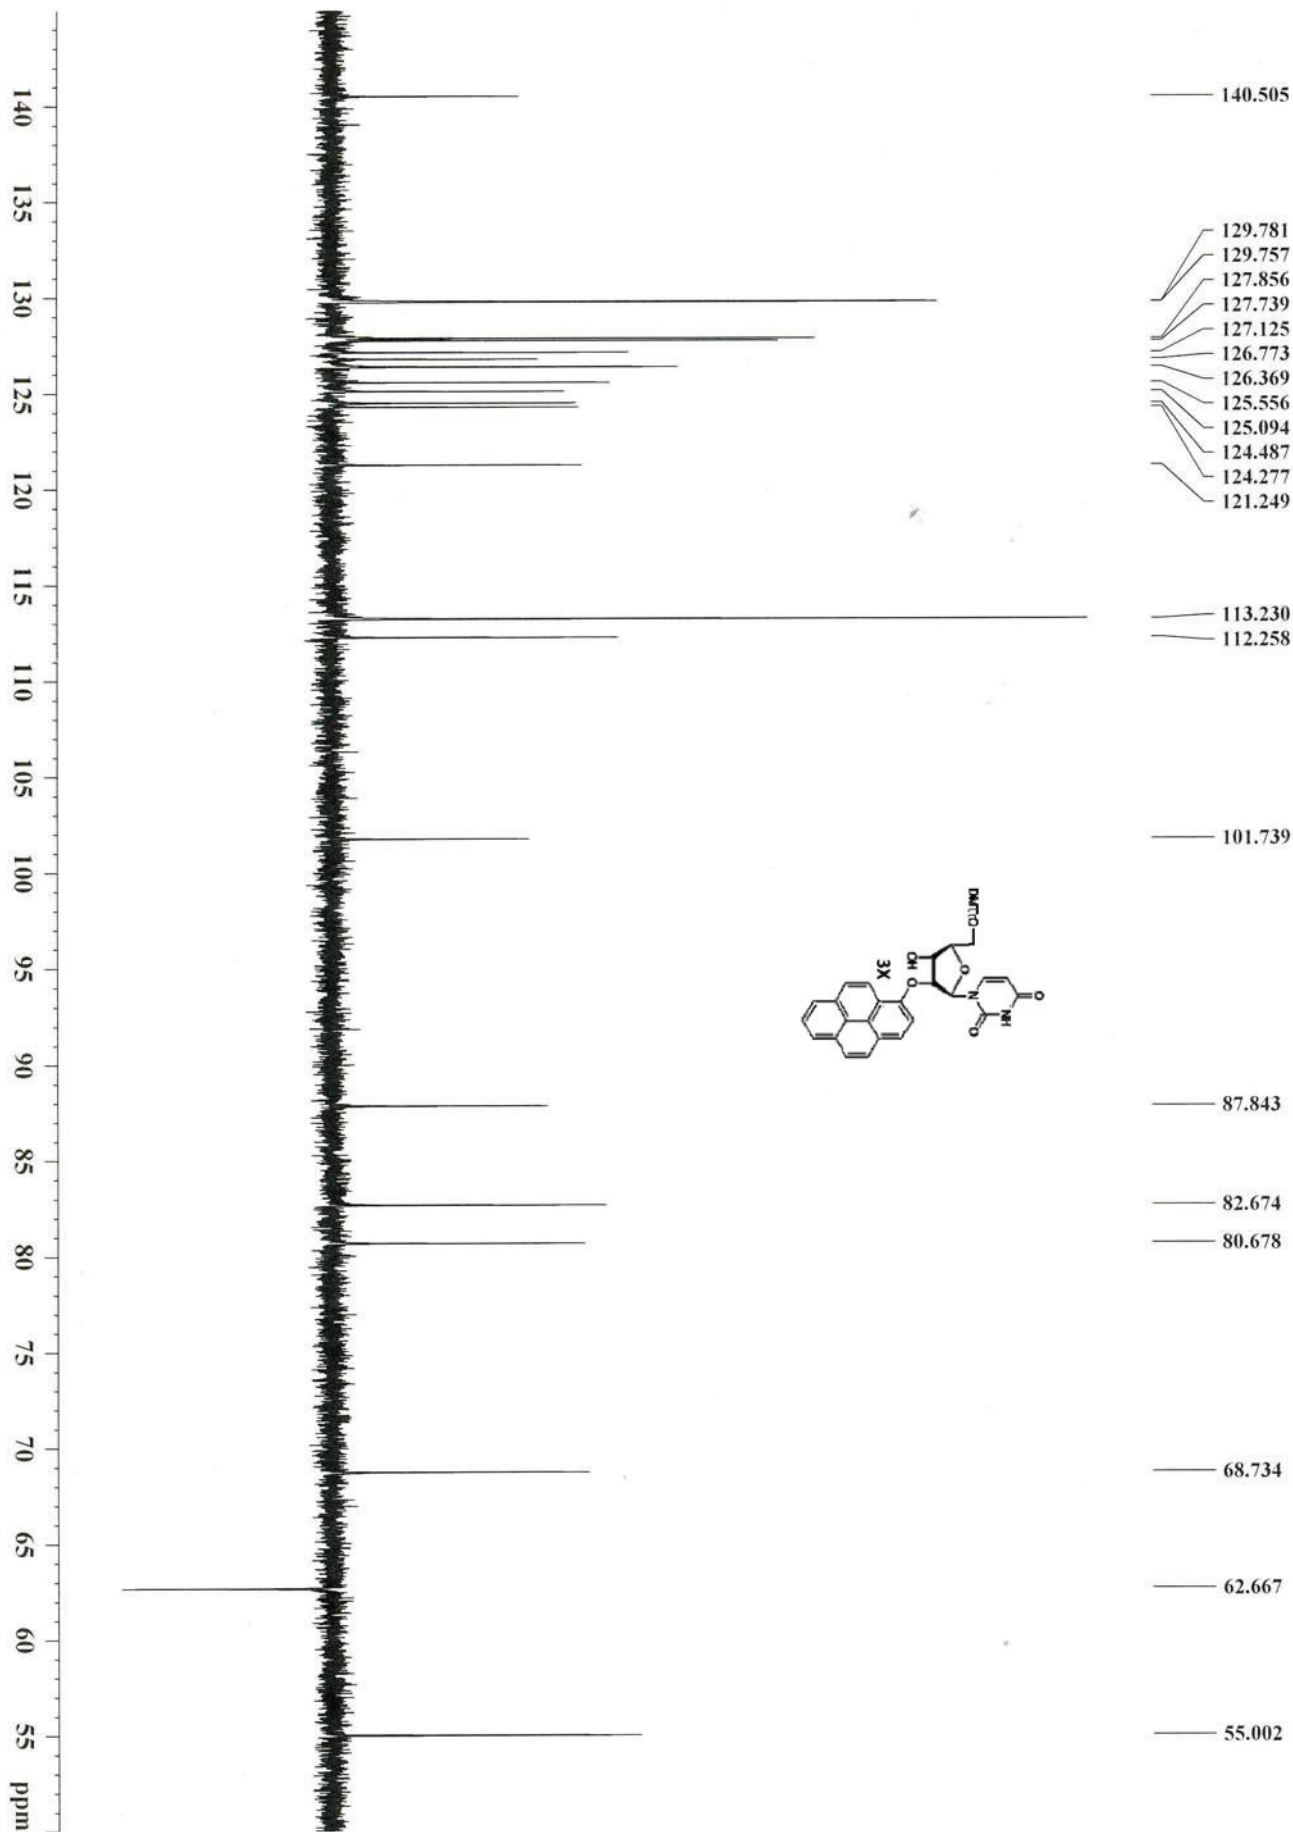



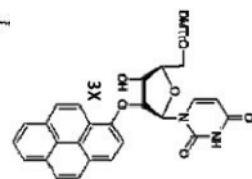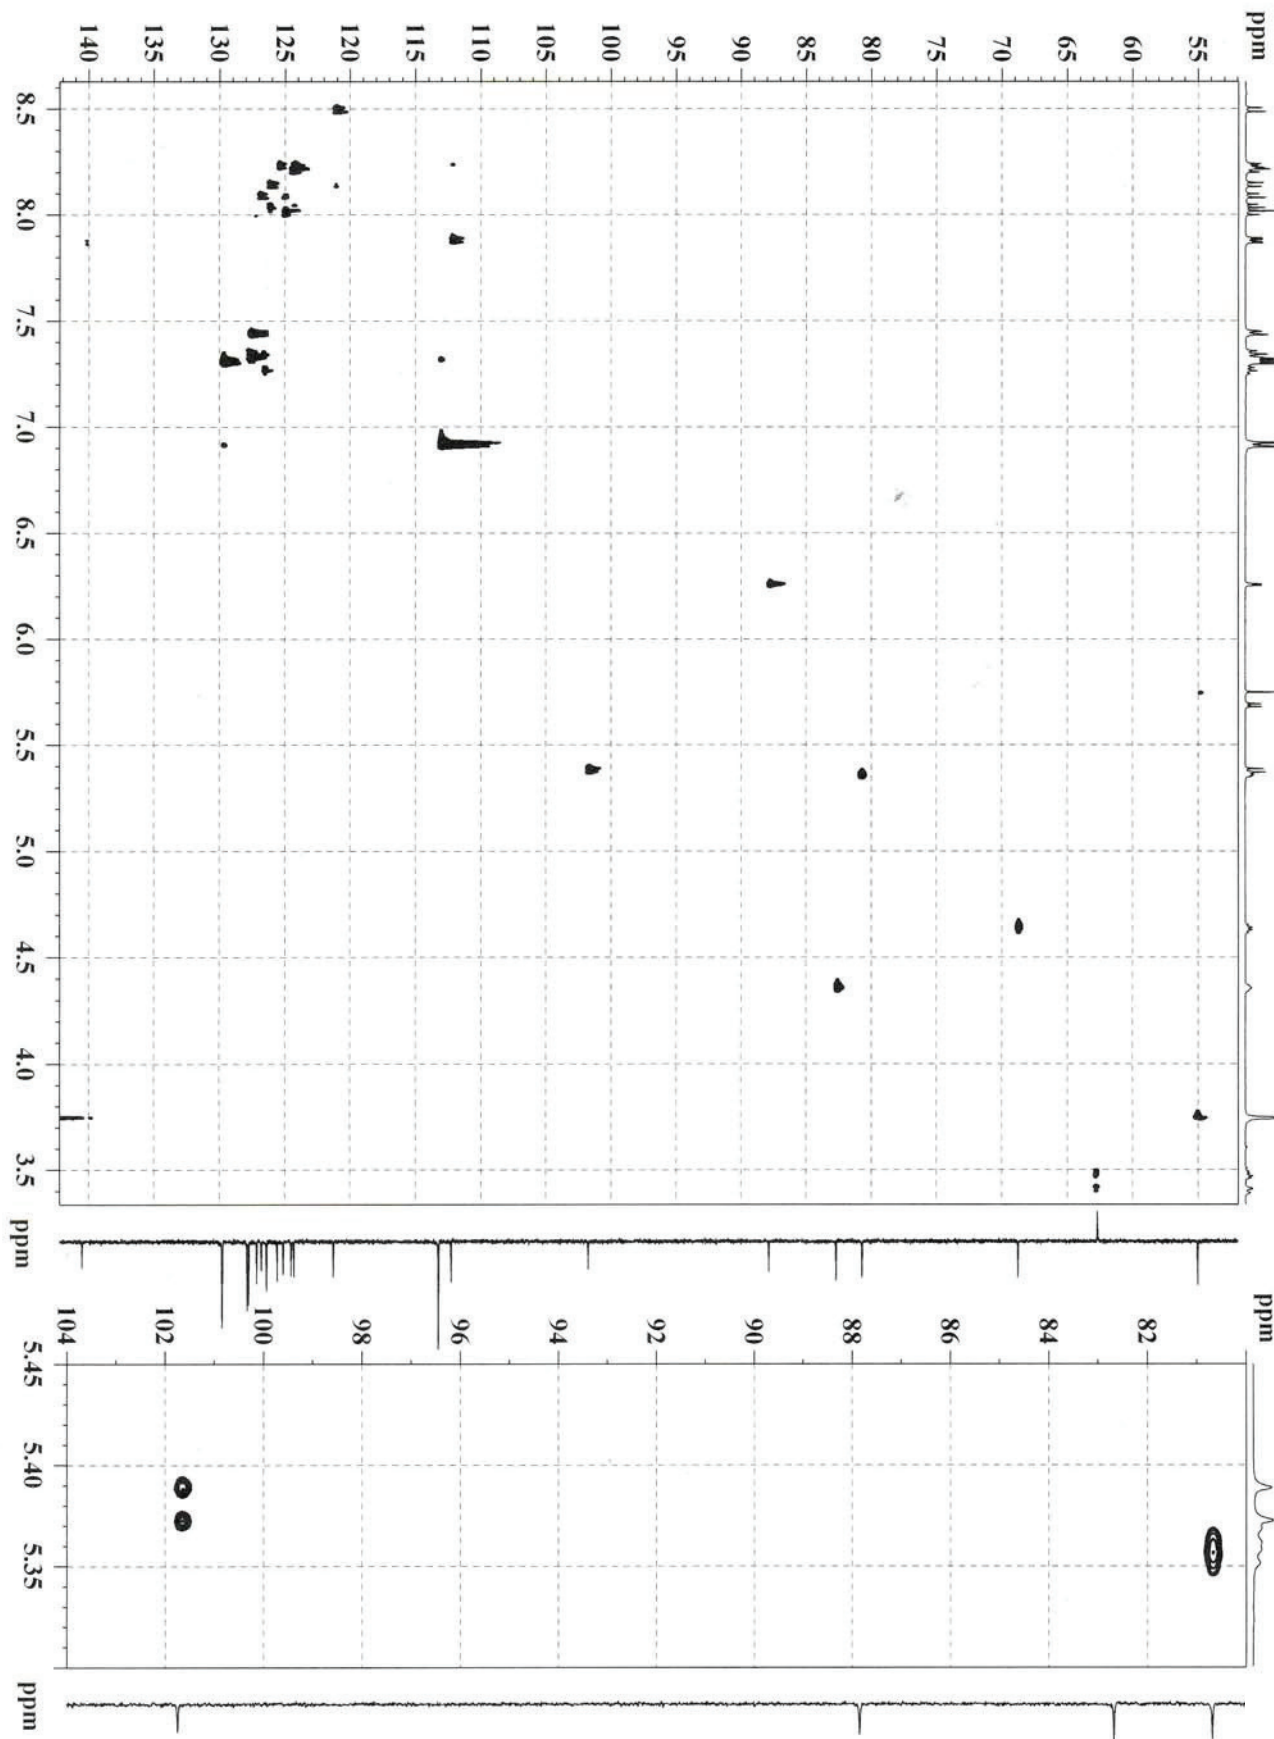



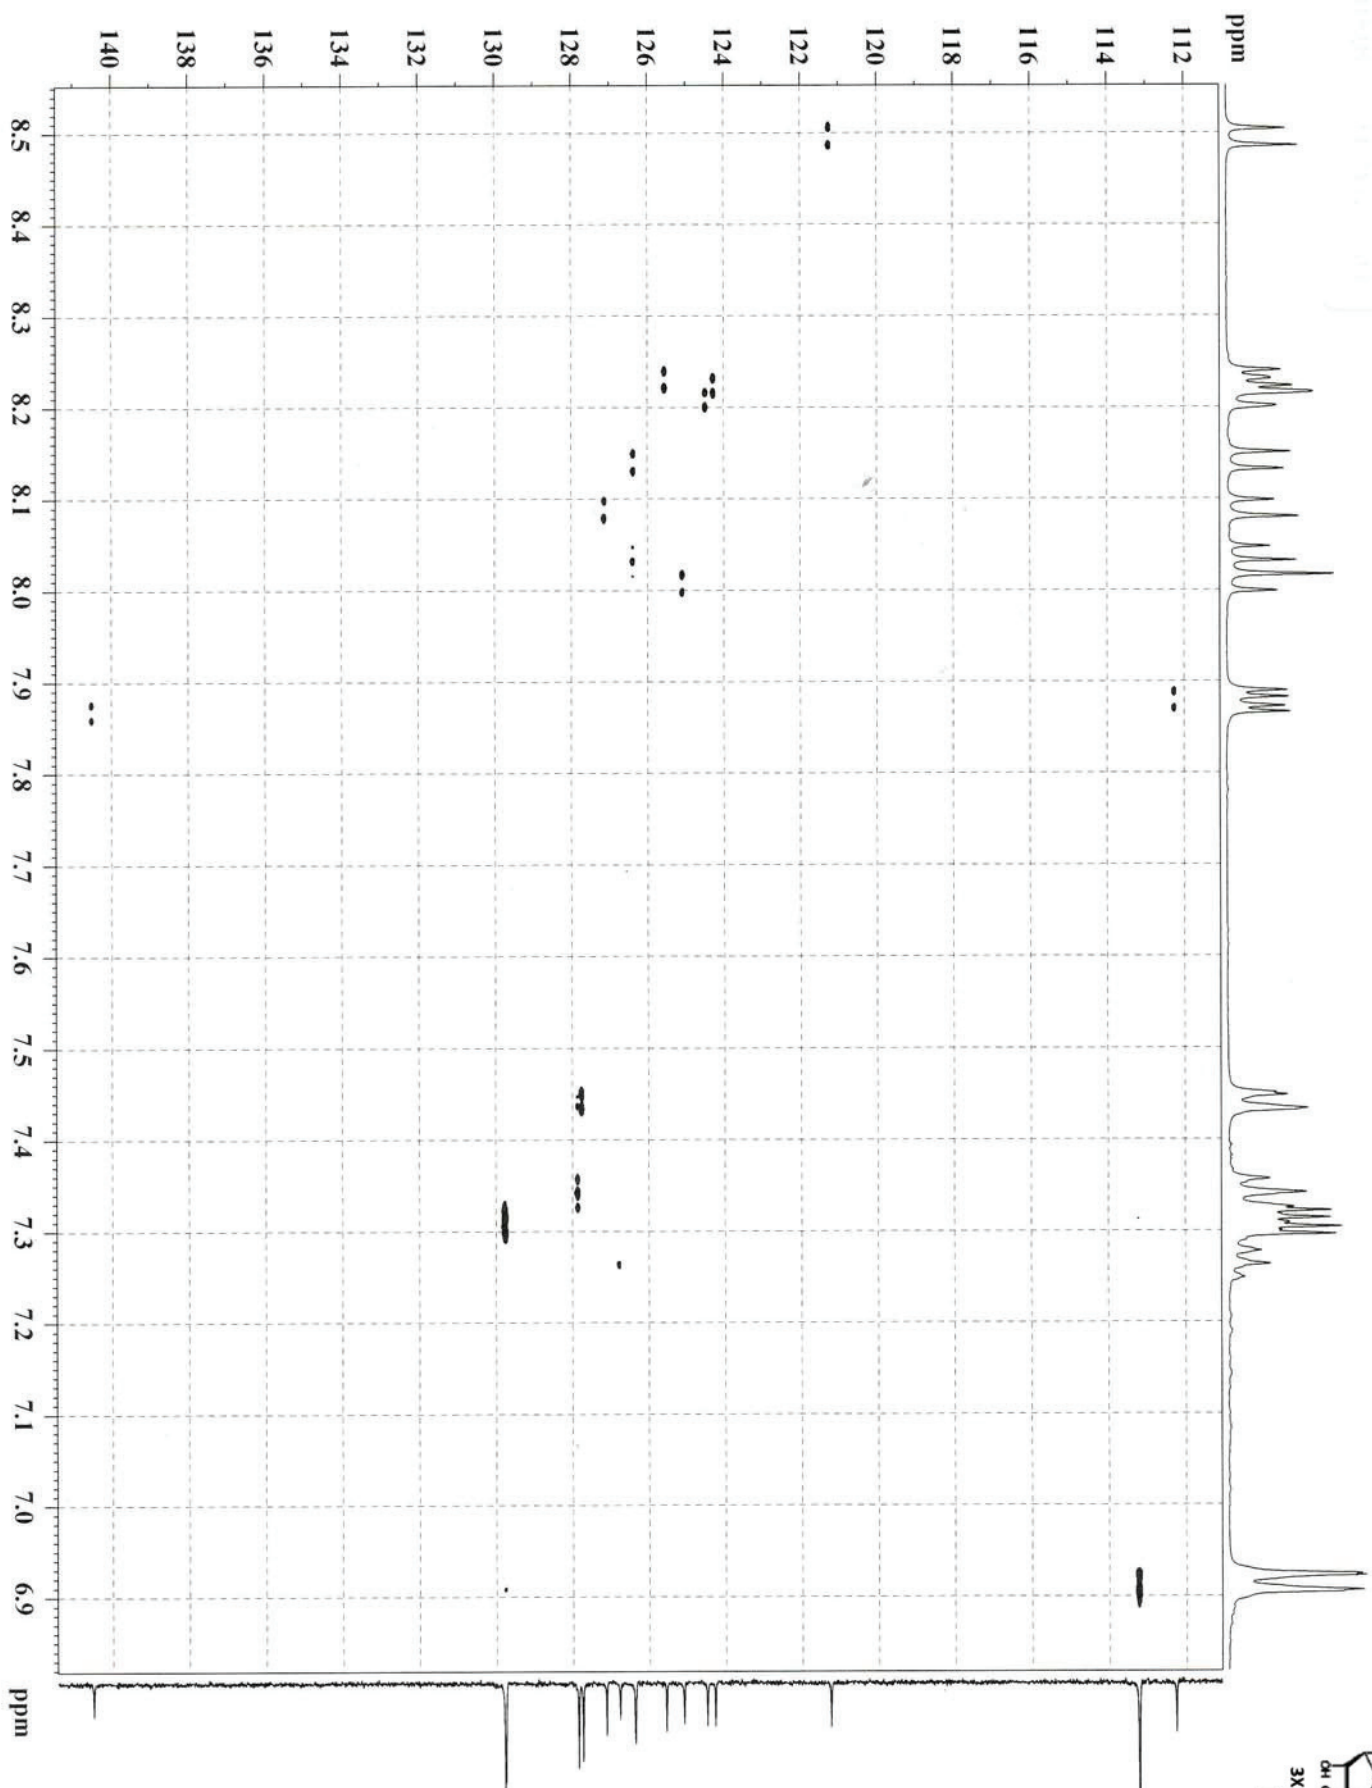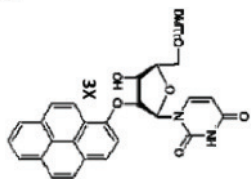

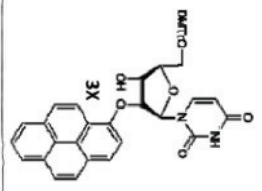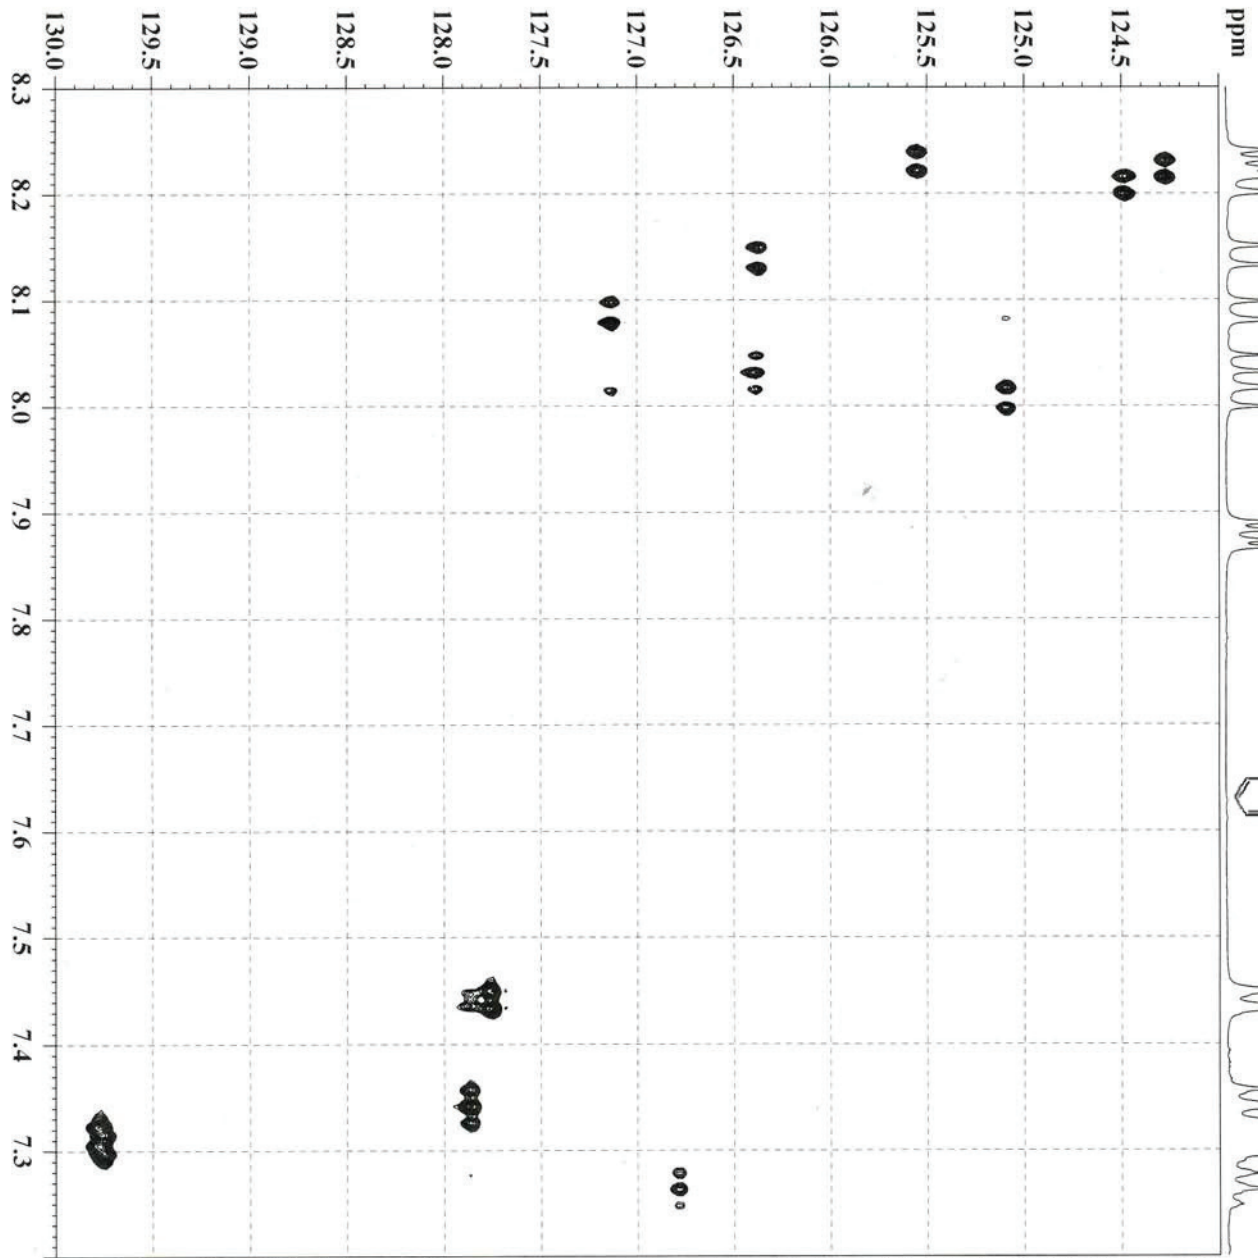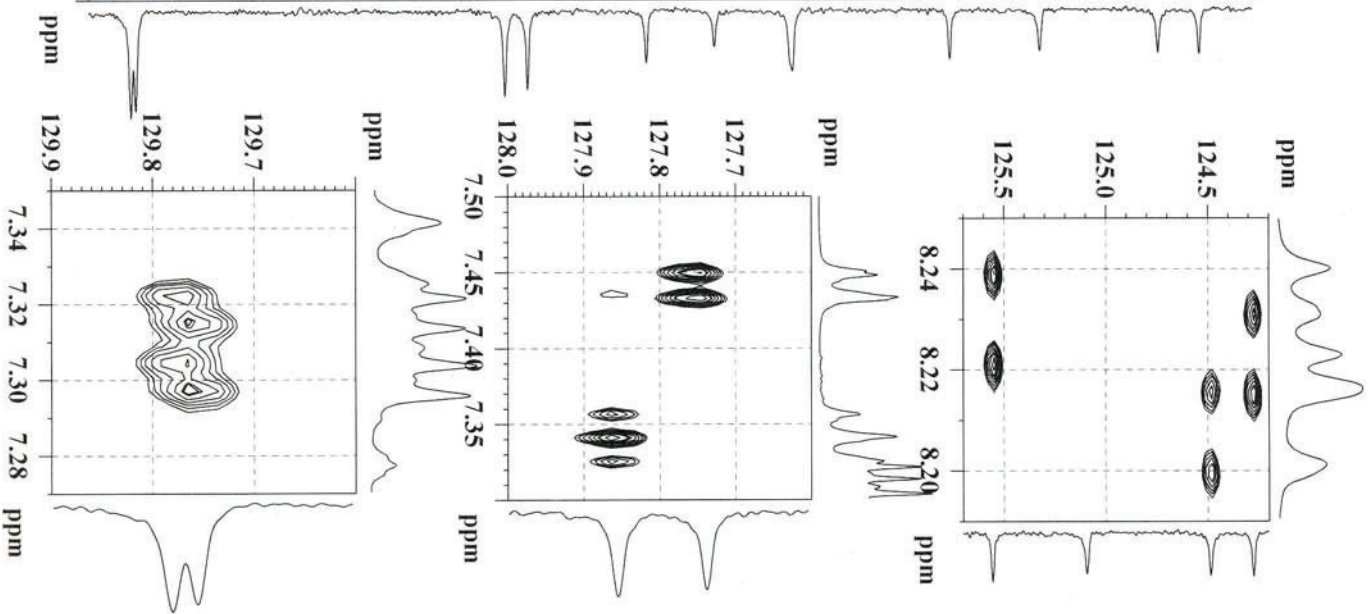

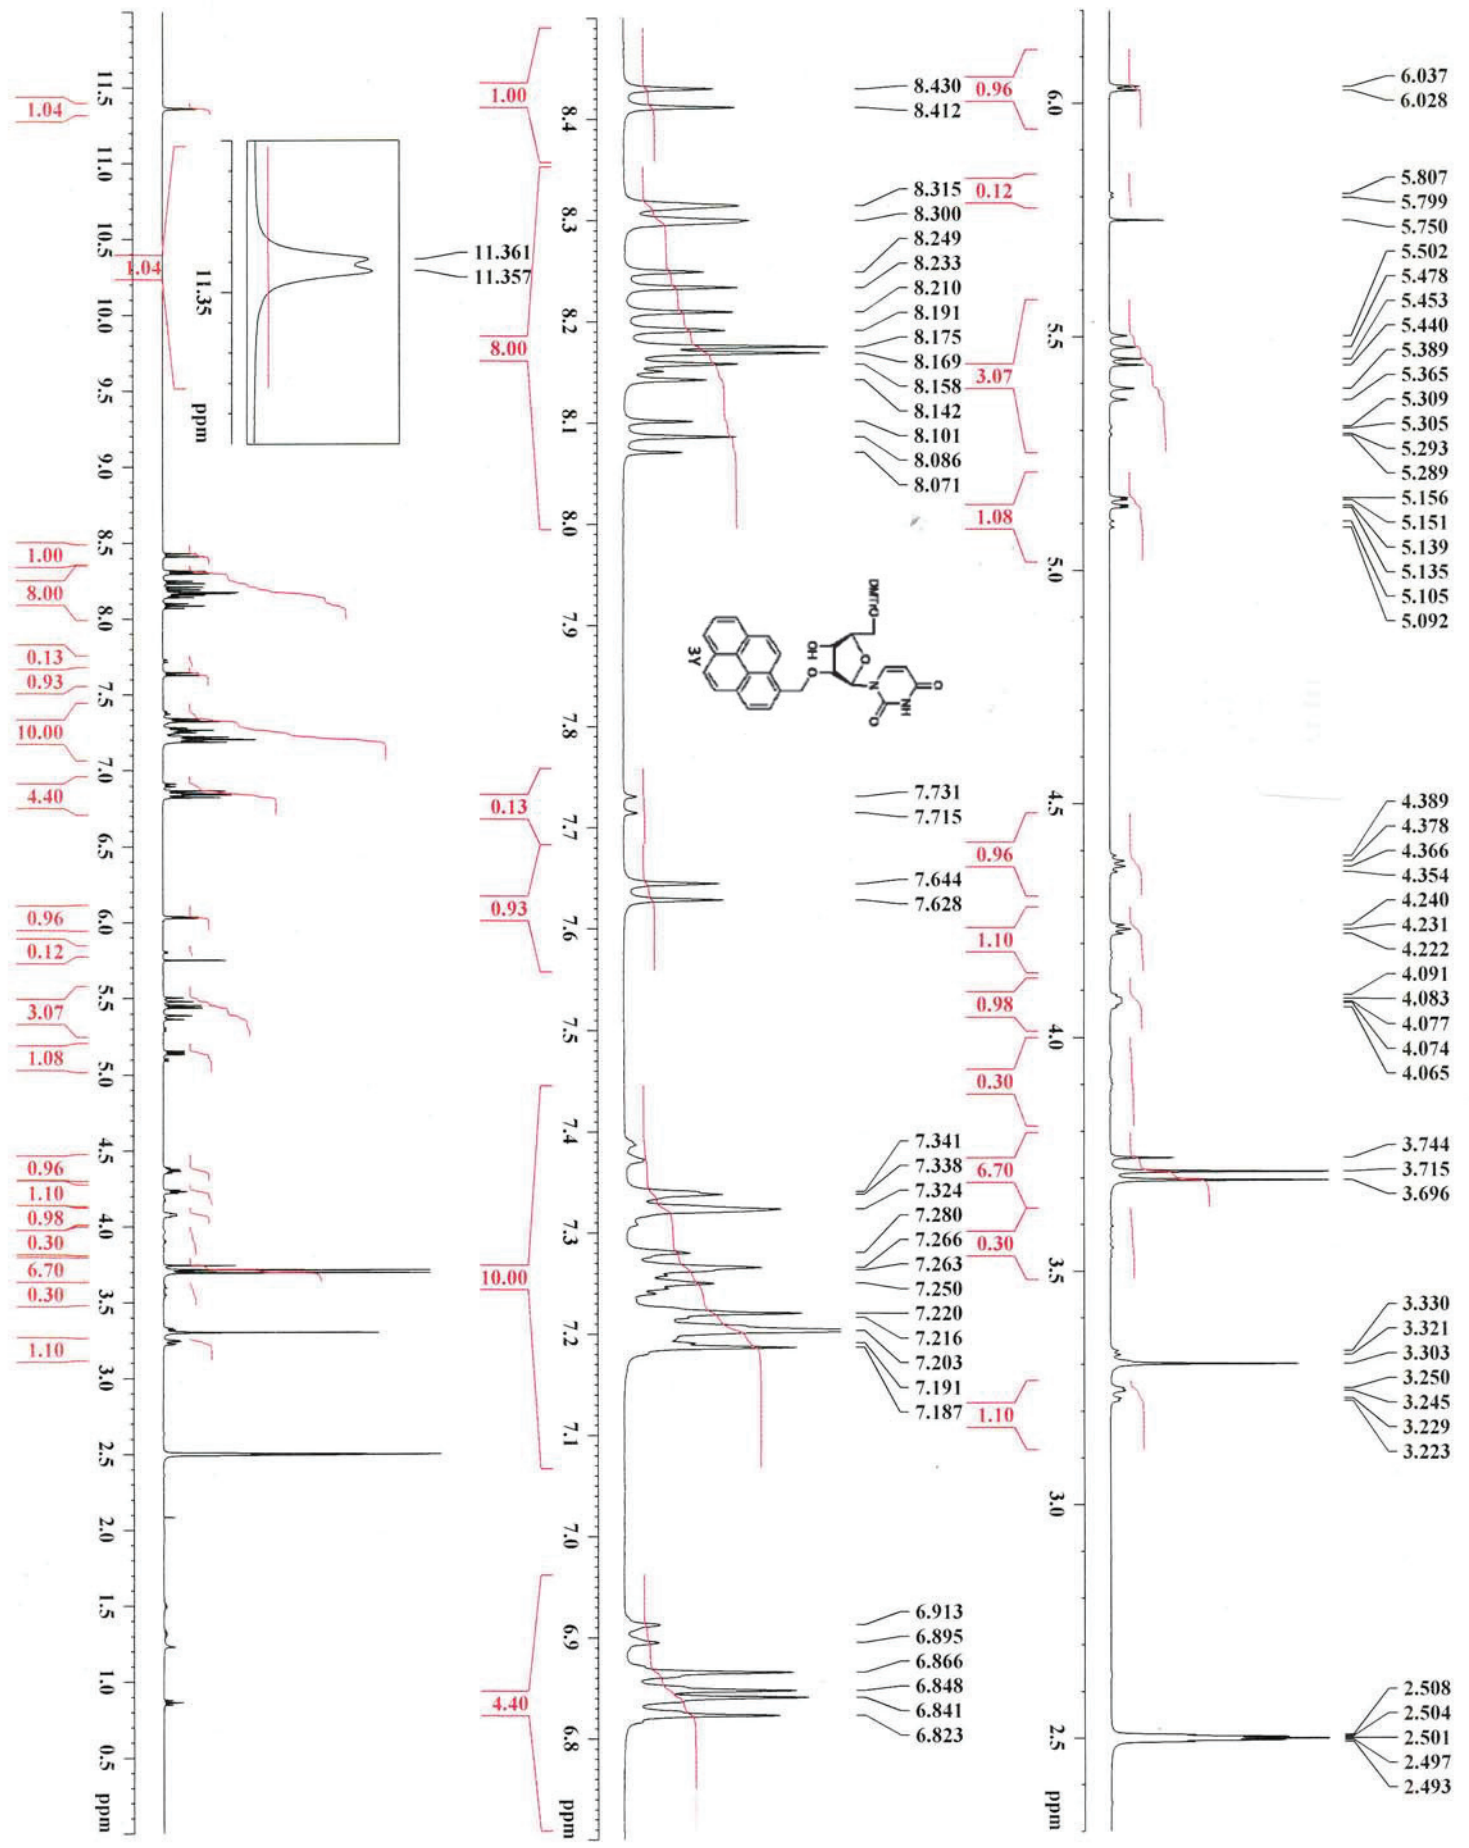



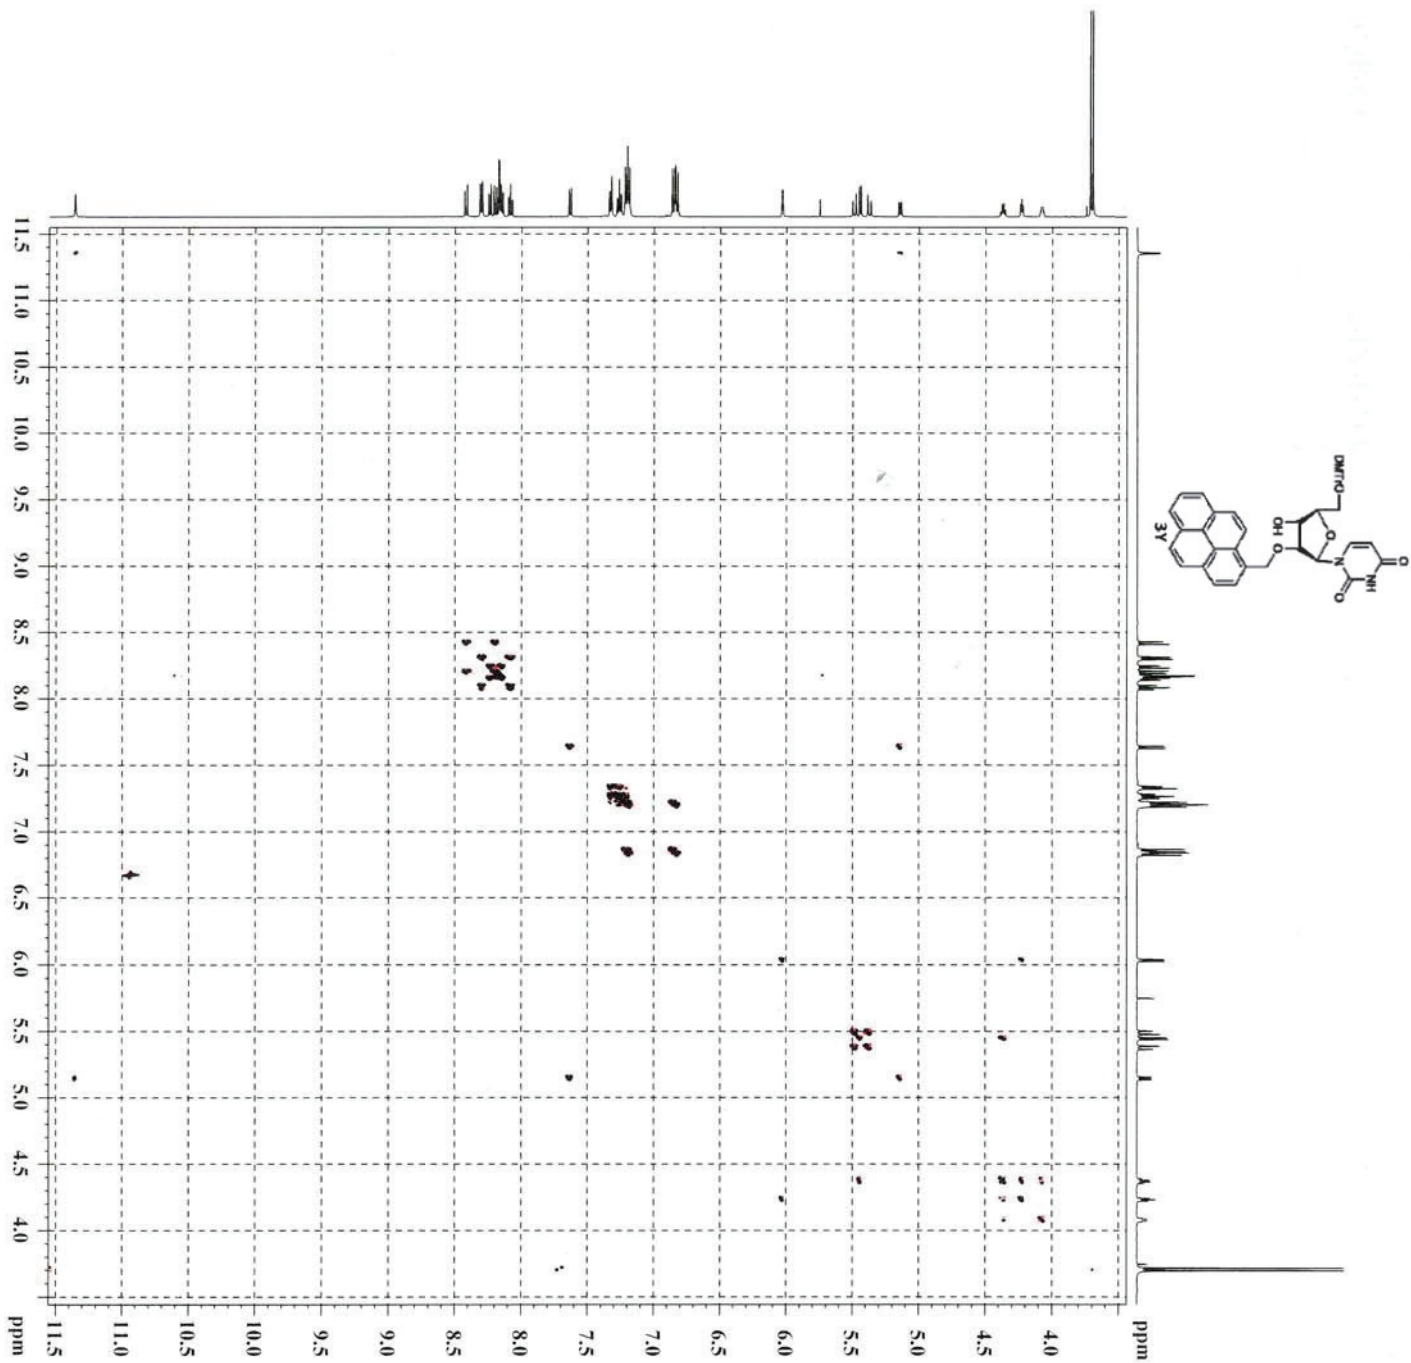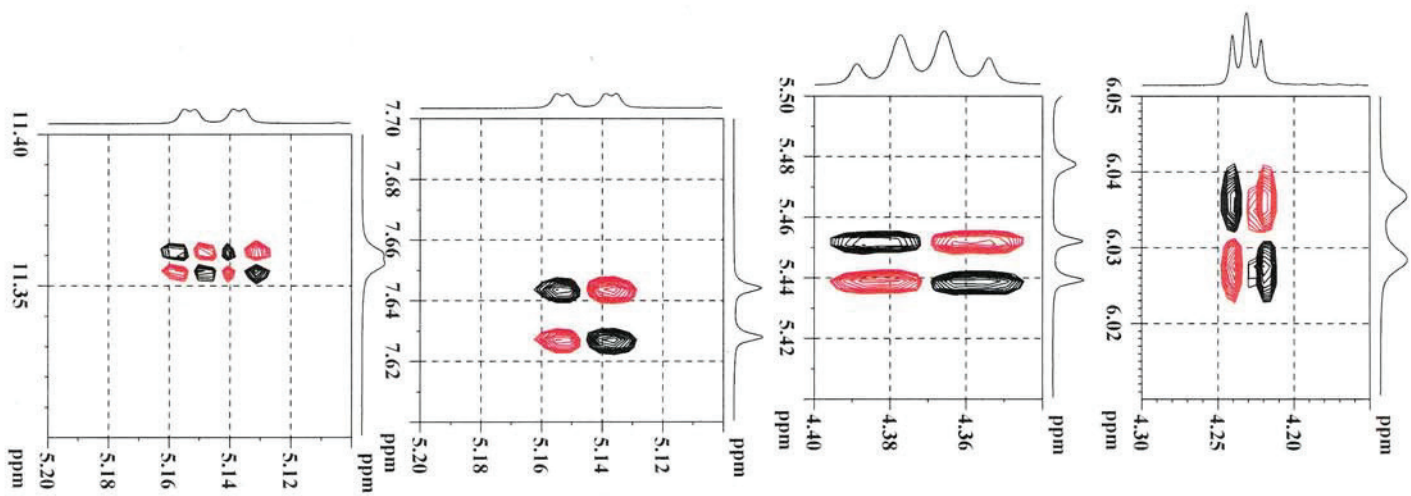



100% DMSO-d<sub>6</sub> (TMS) 400 MHz

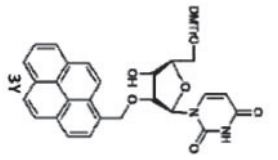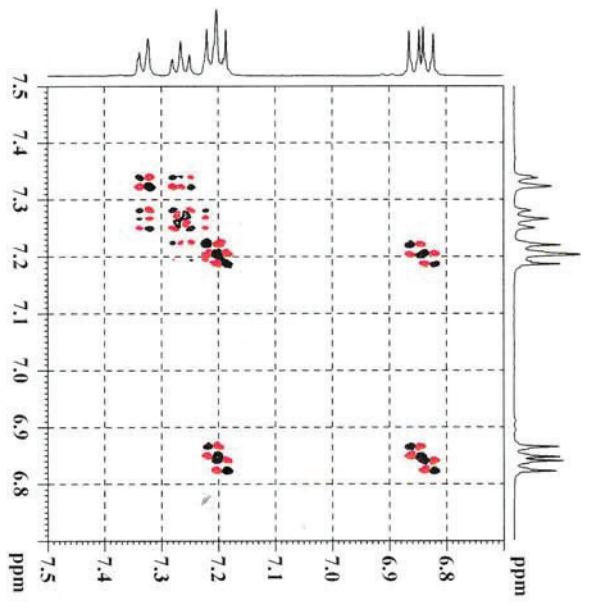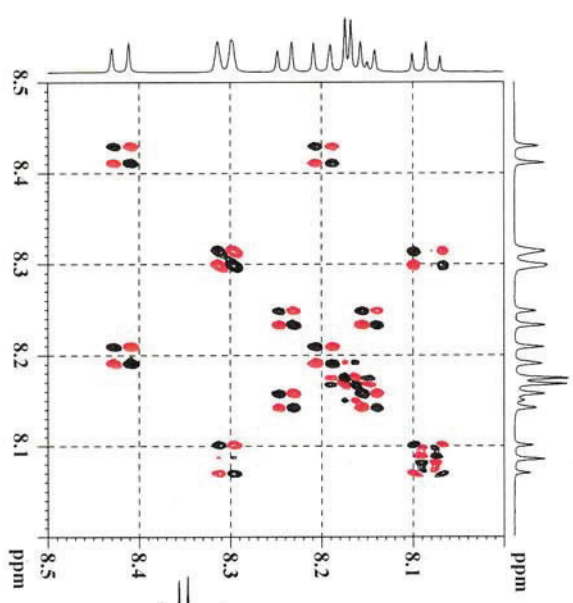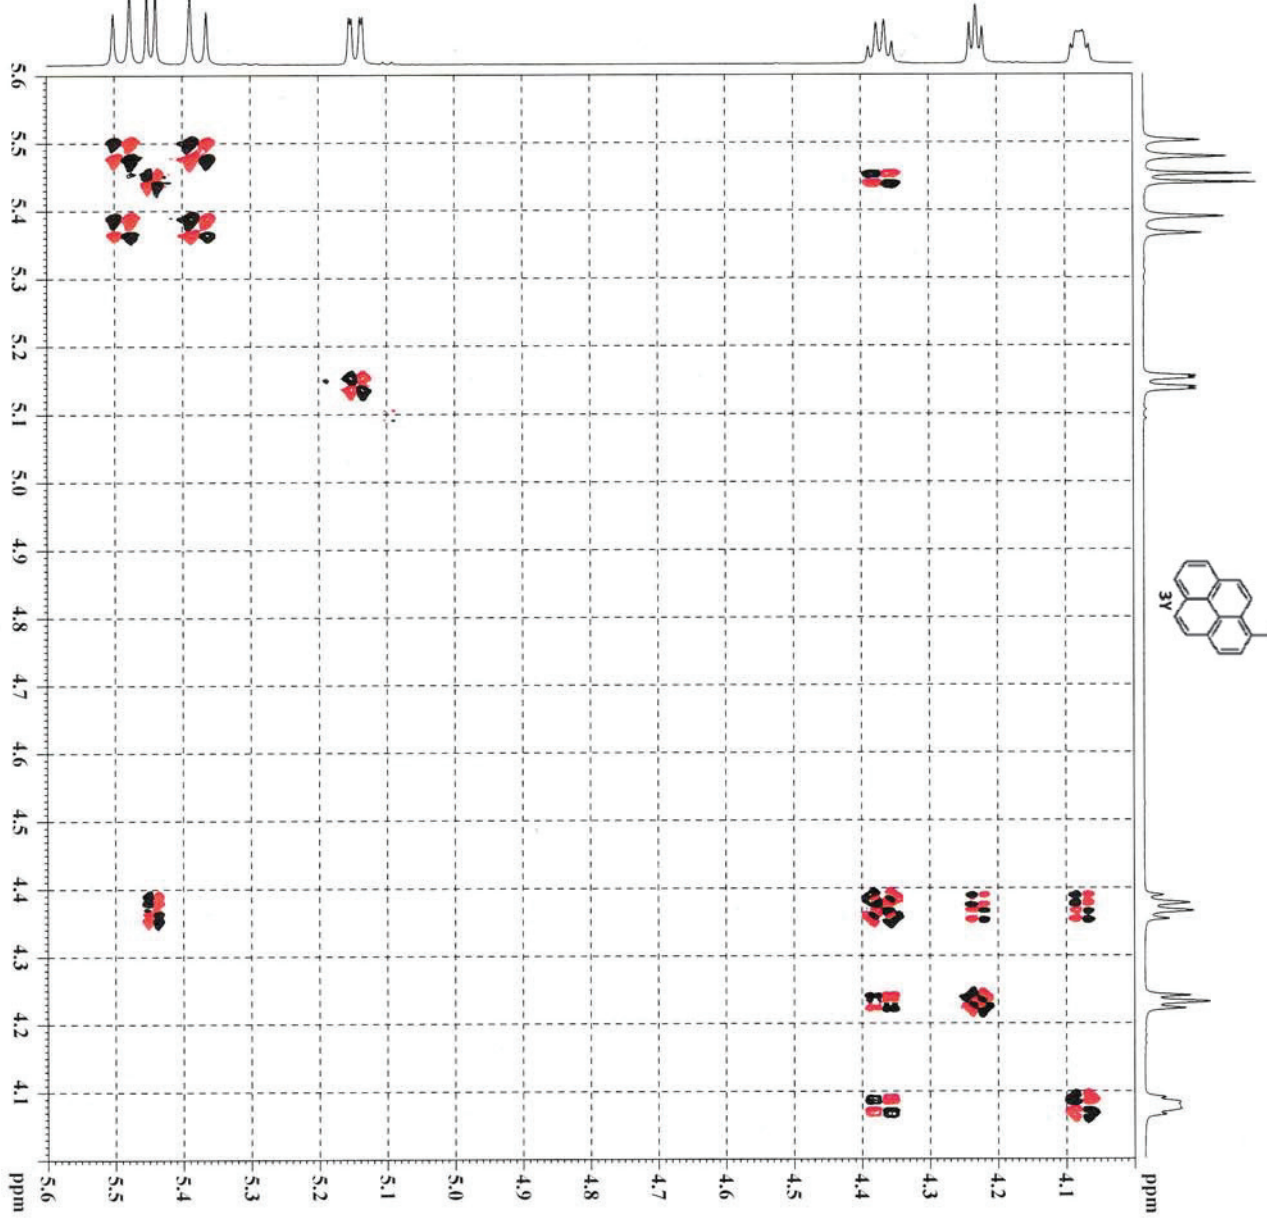

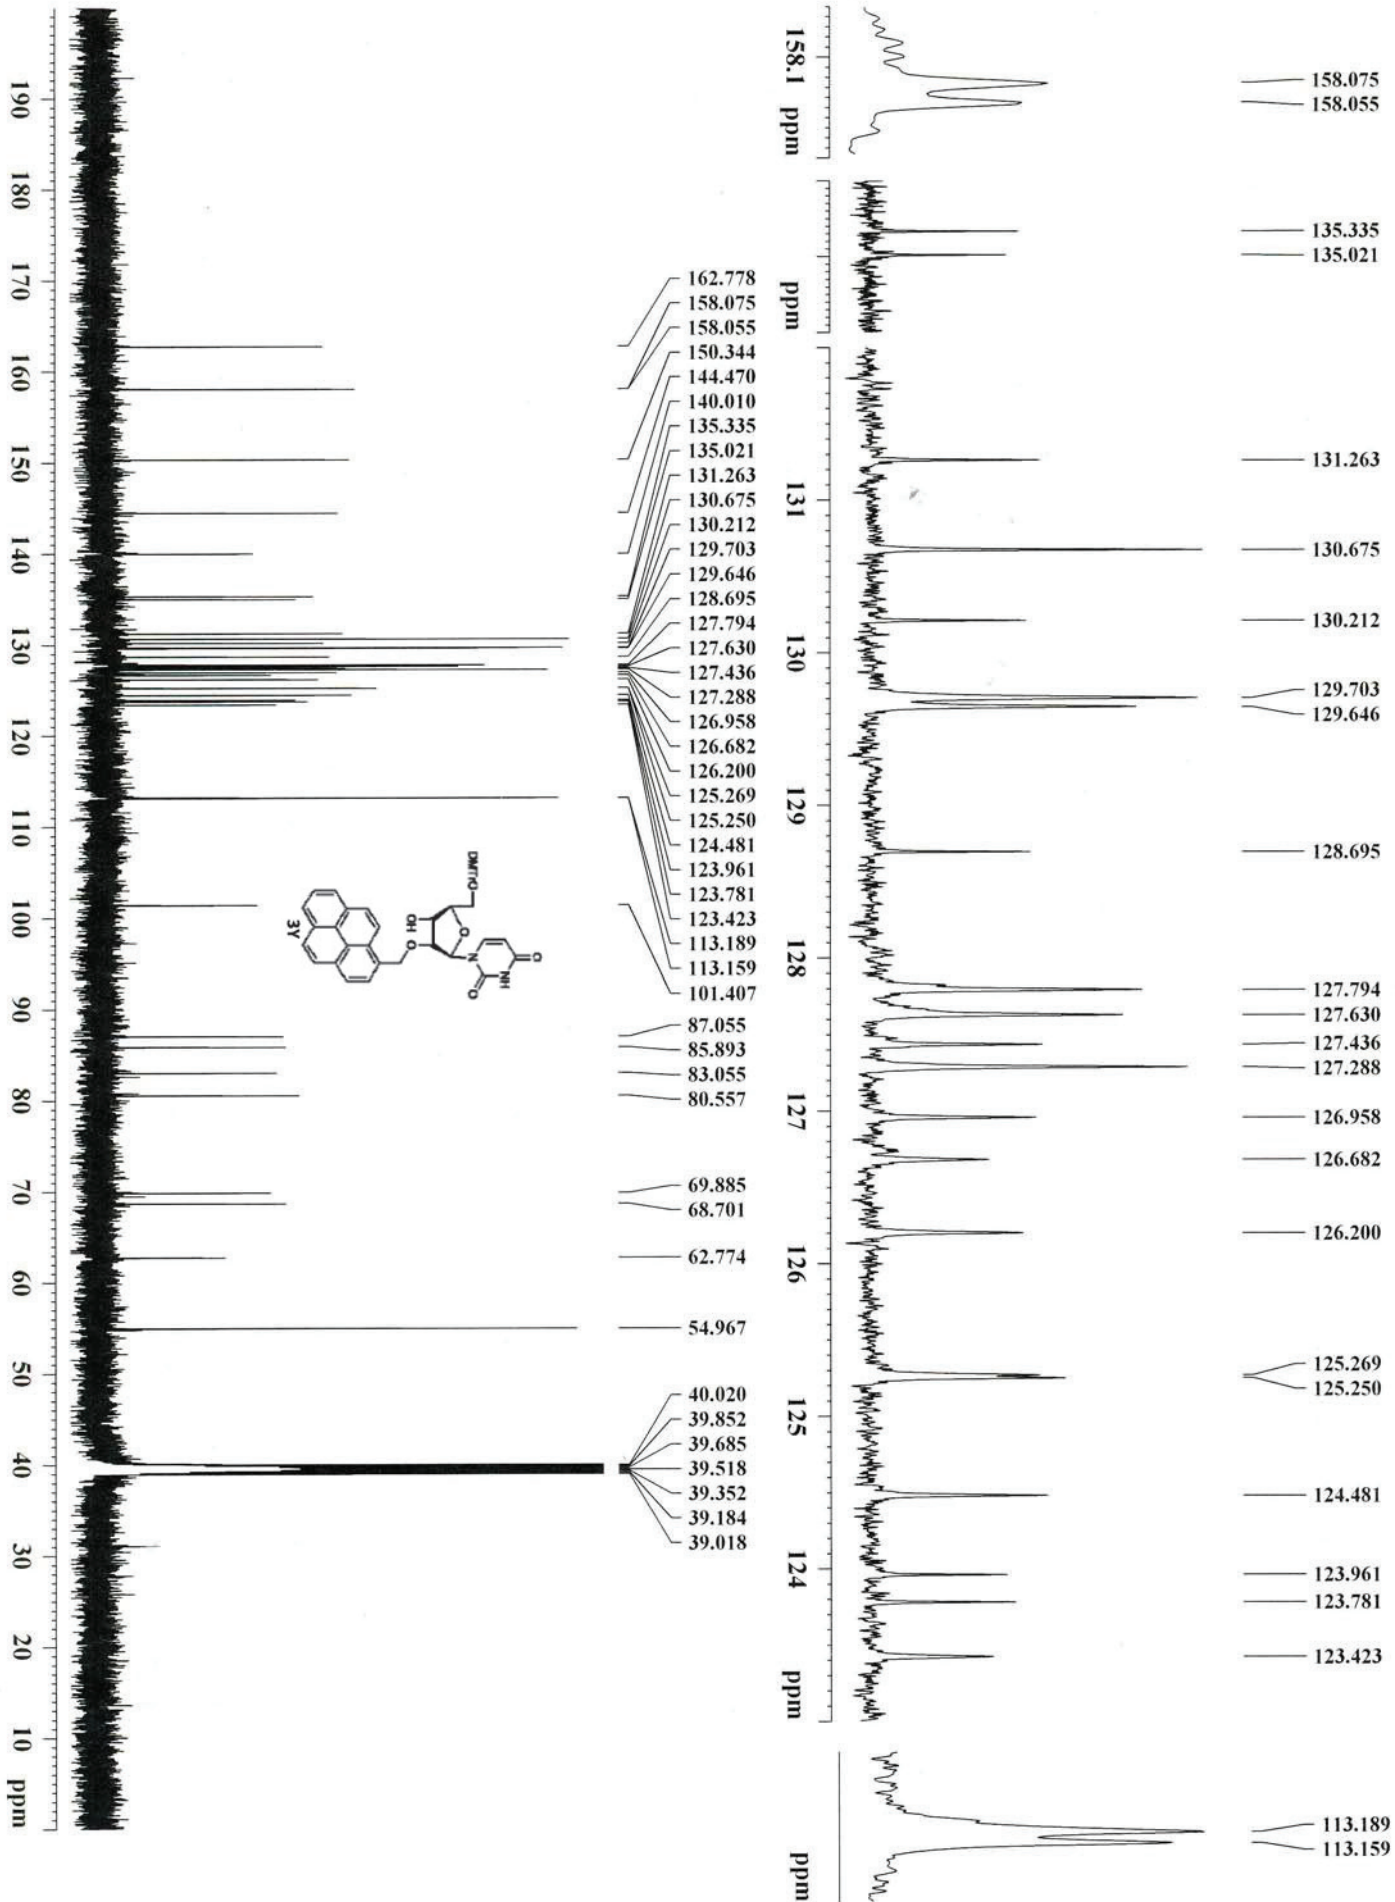

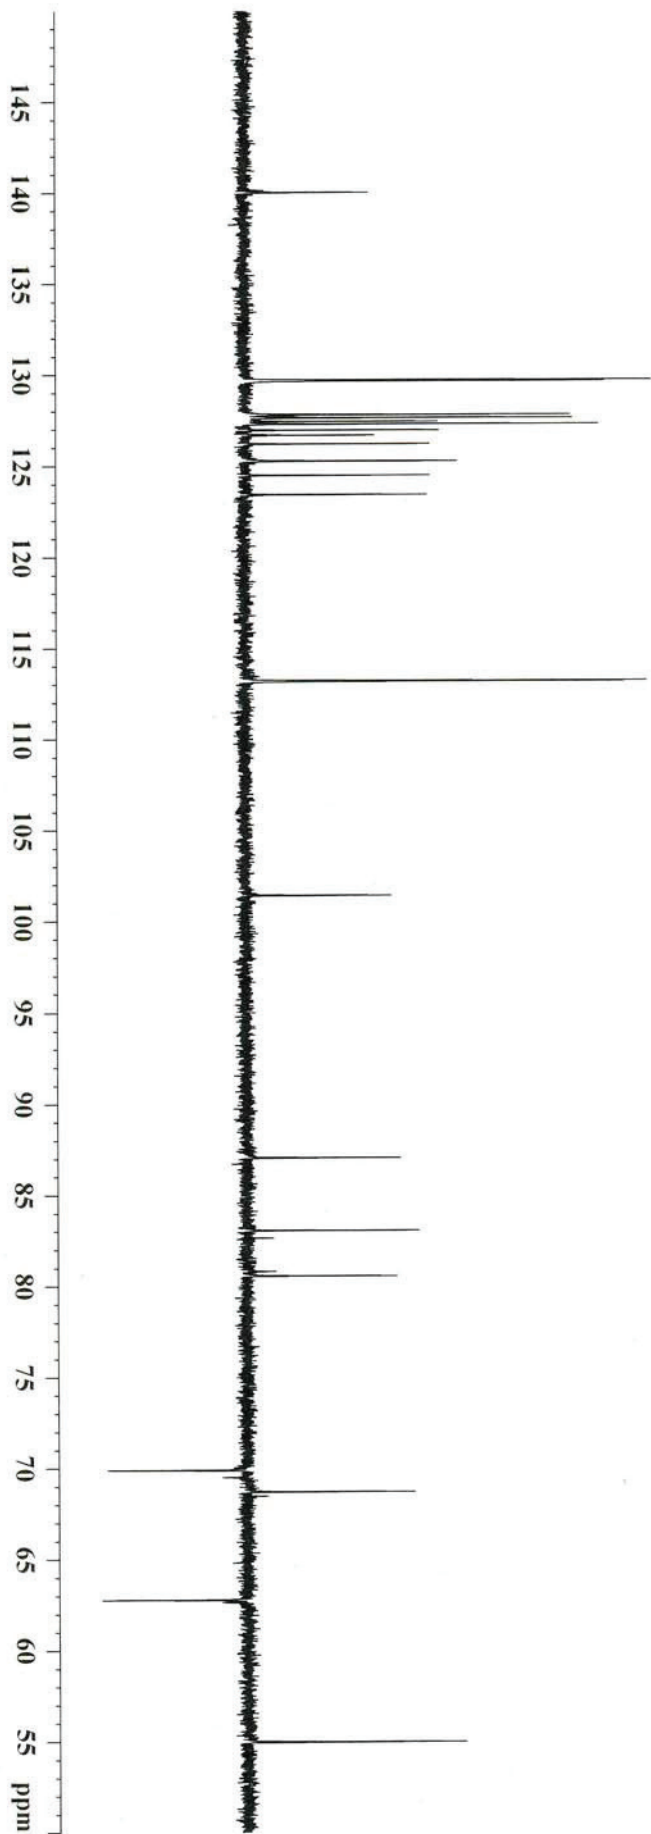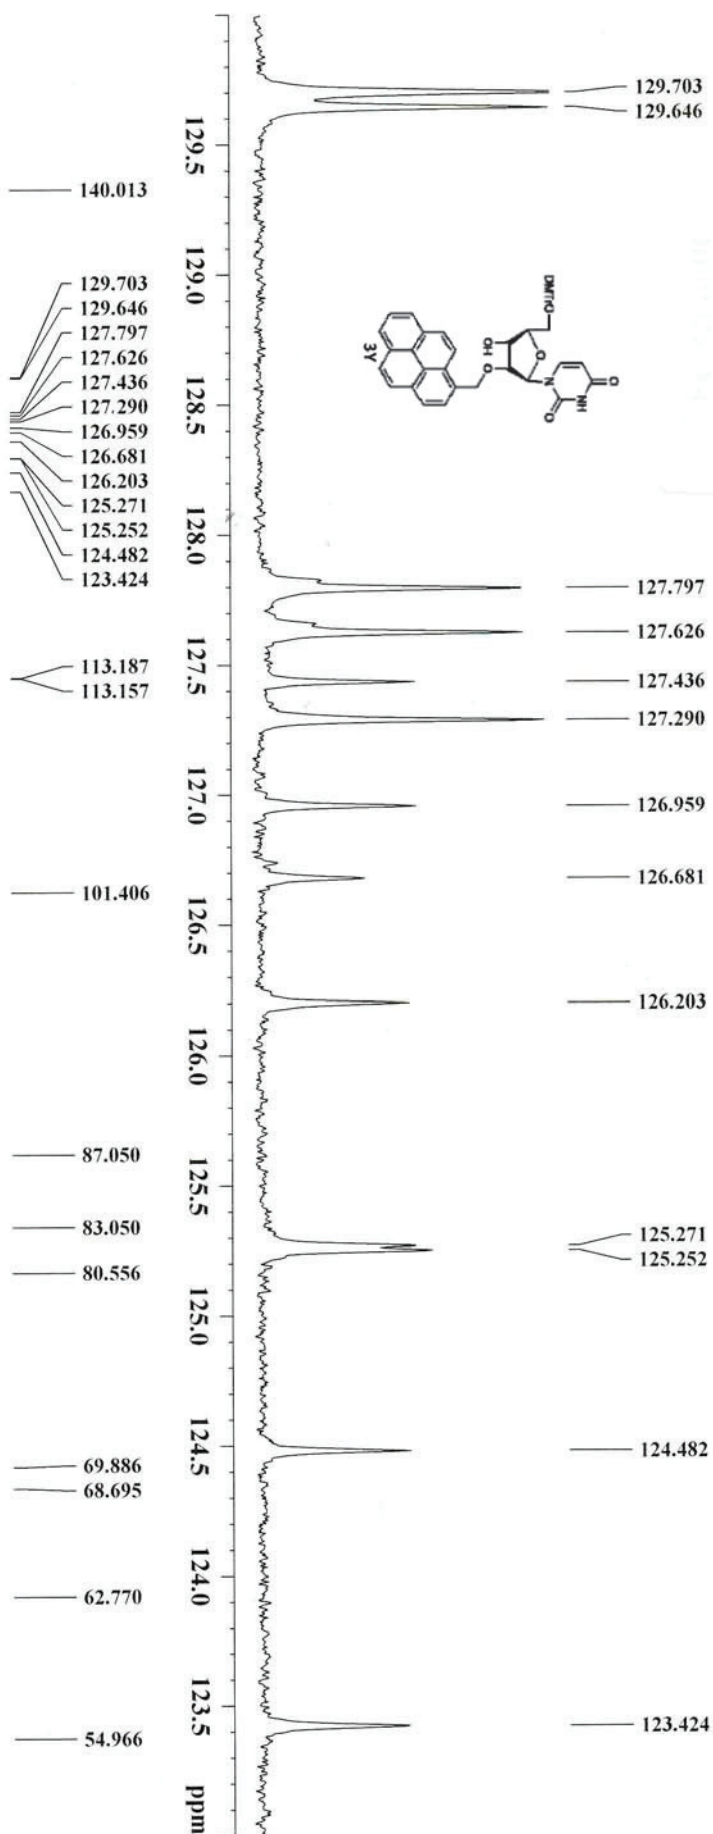

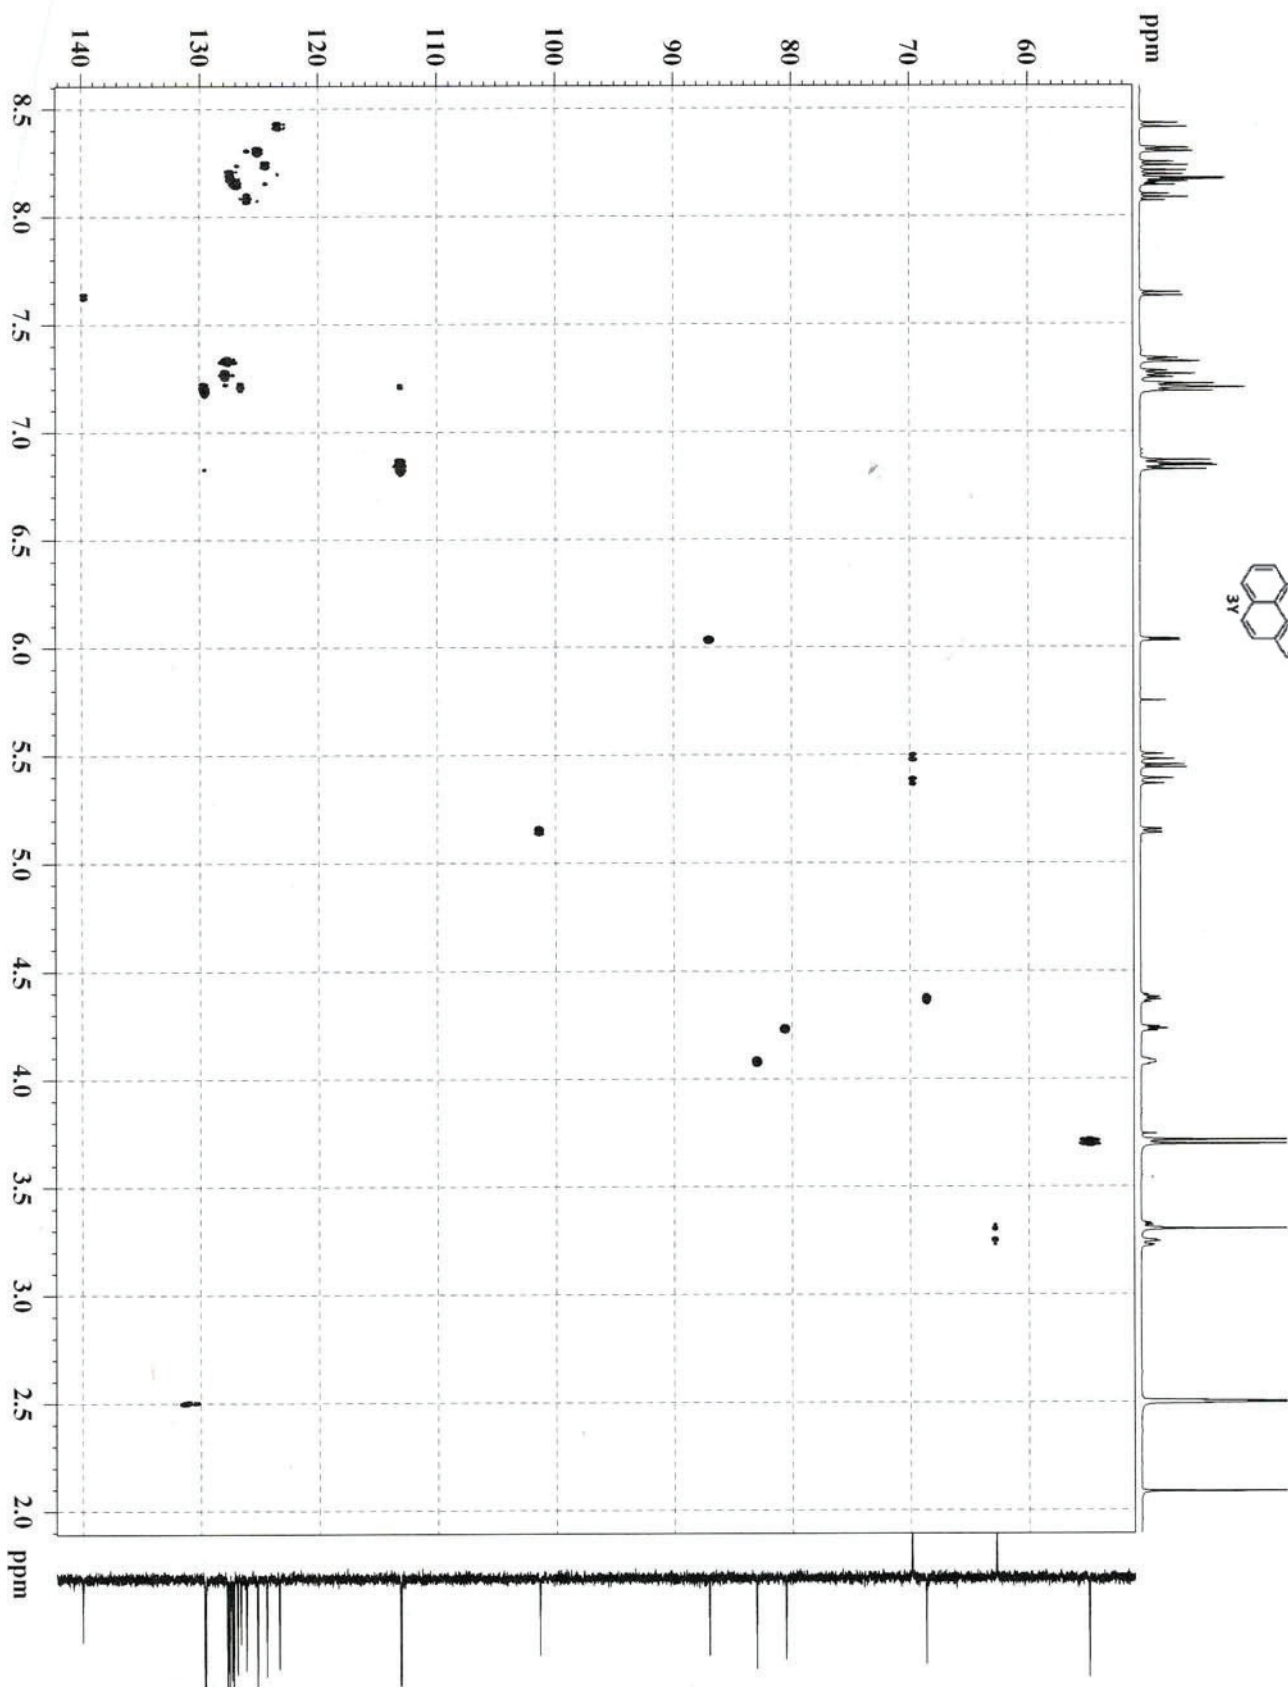



Chemical structure of the compound is shown in the inset.

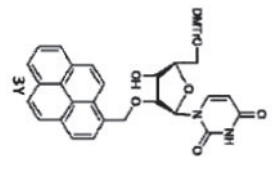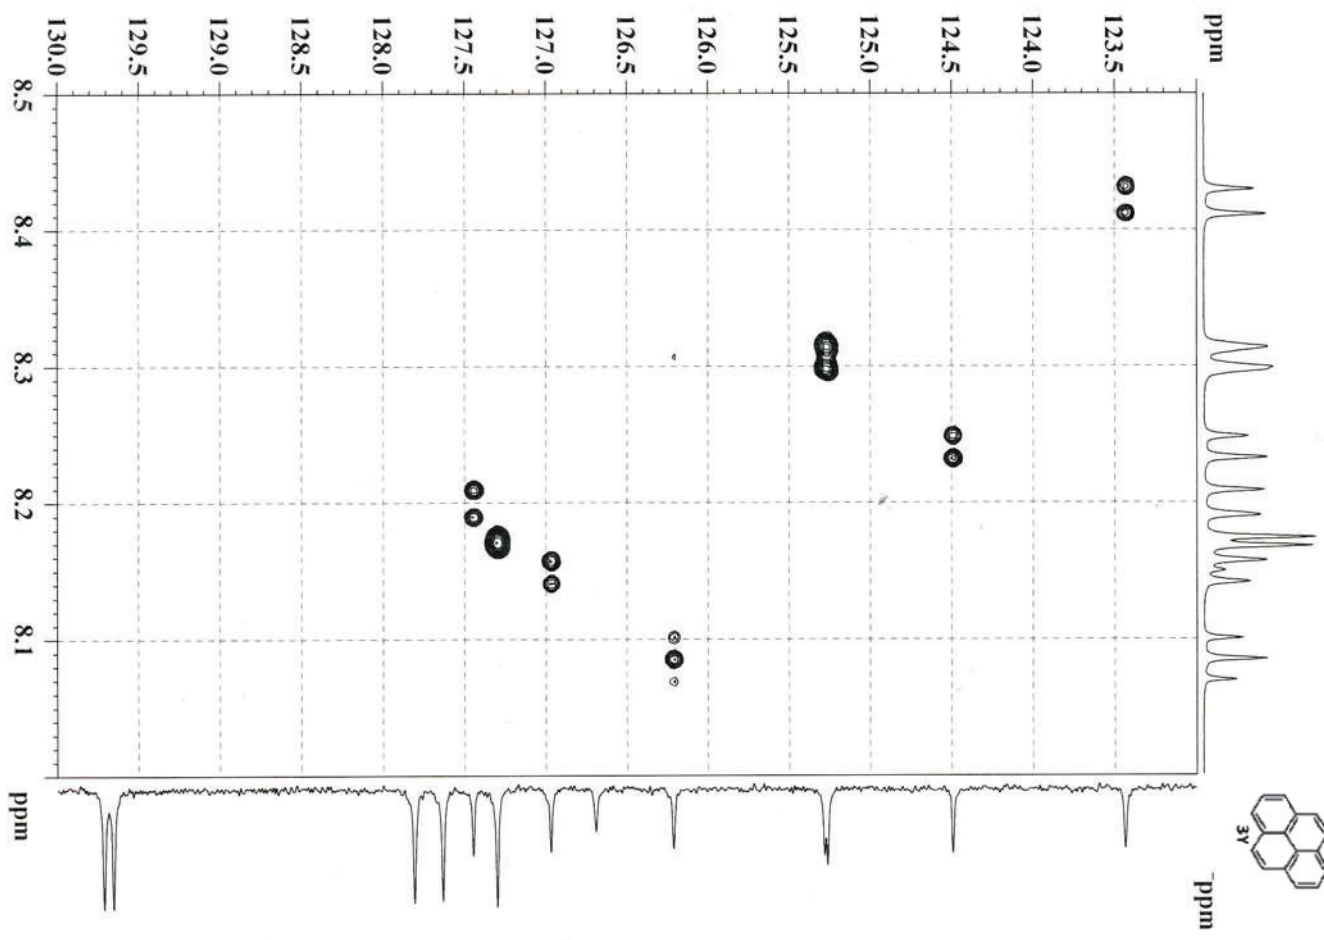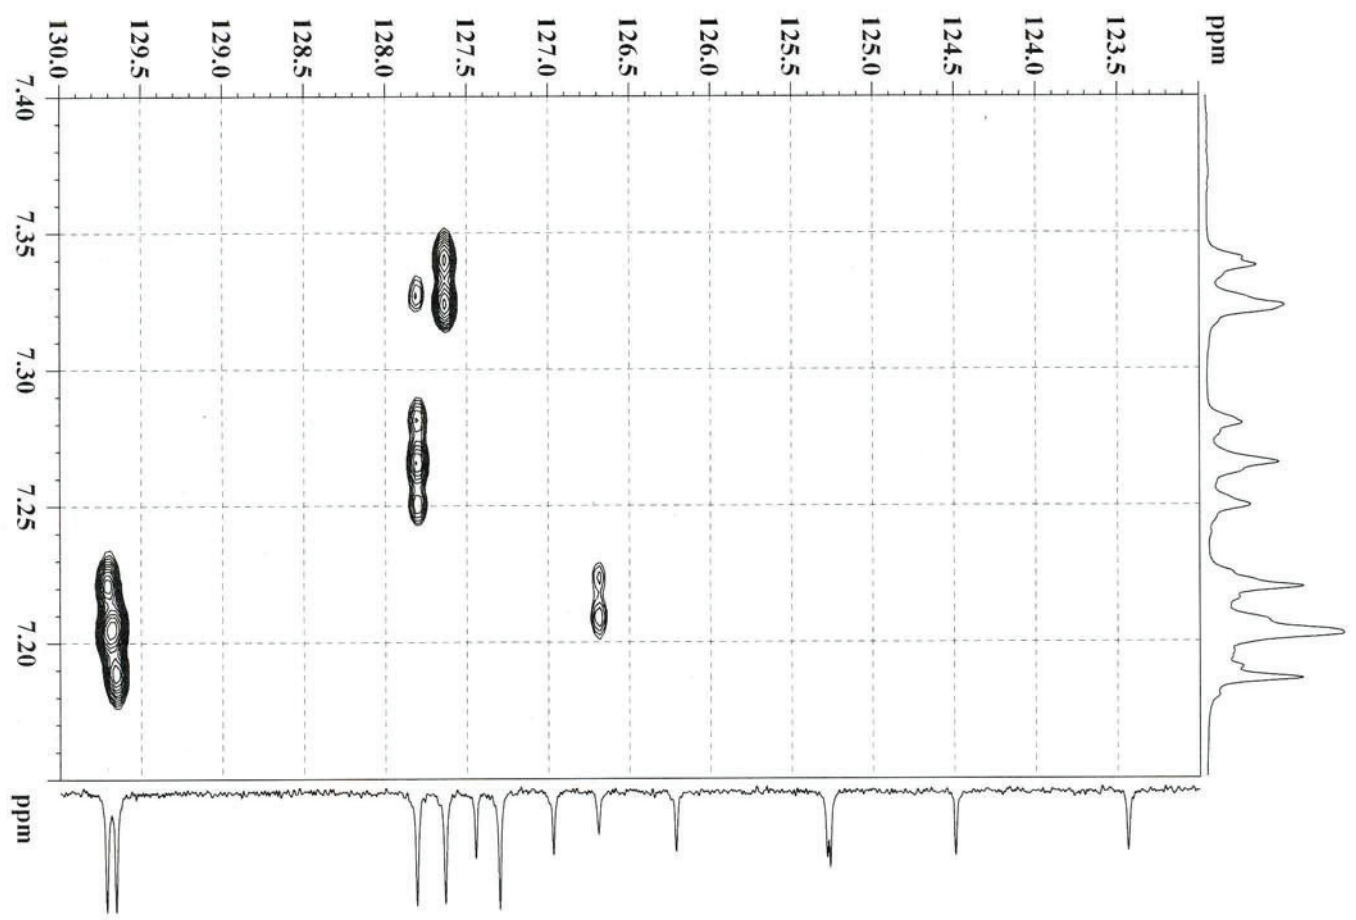

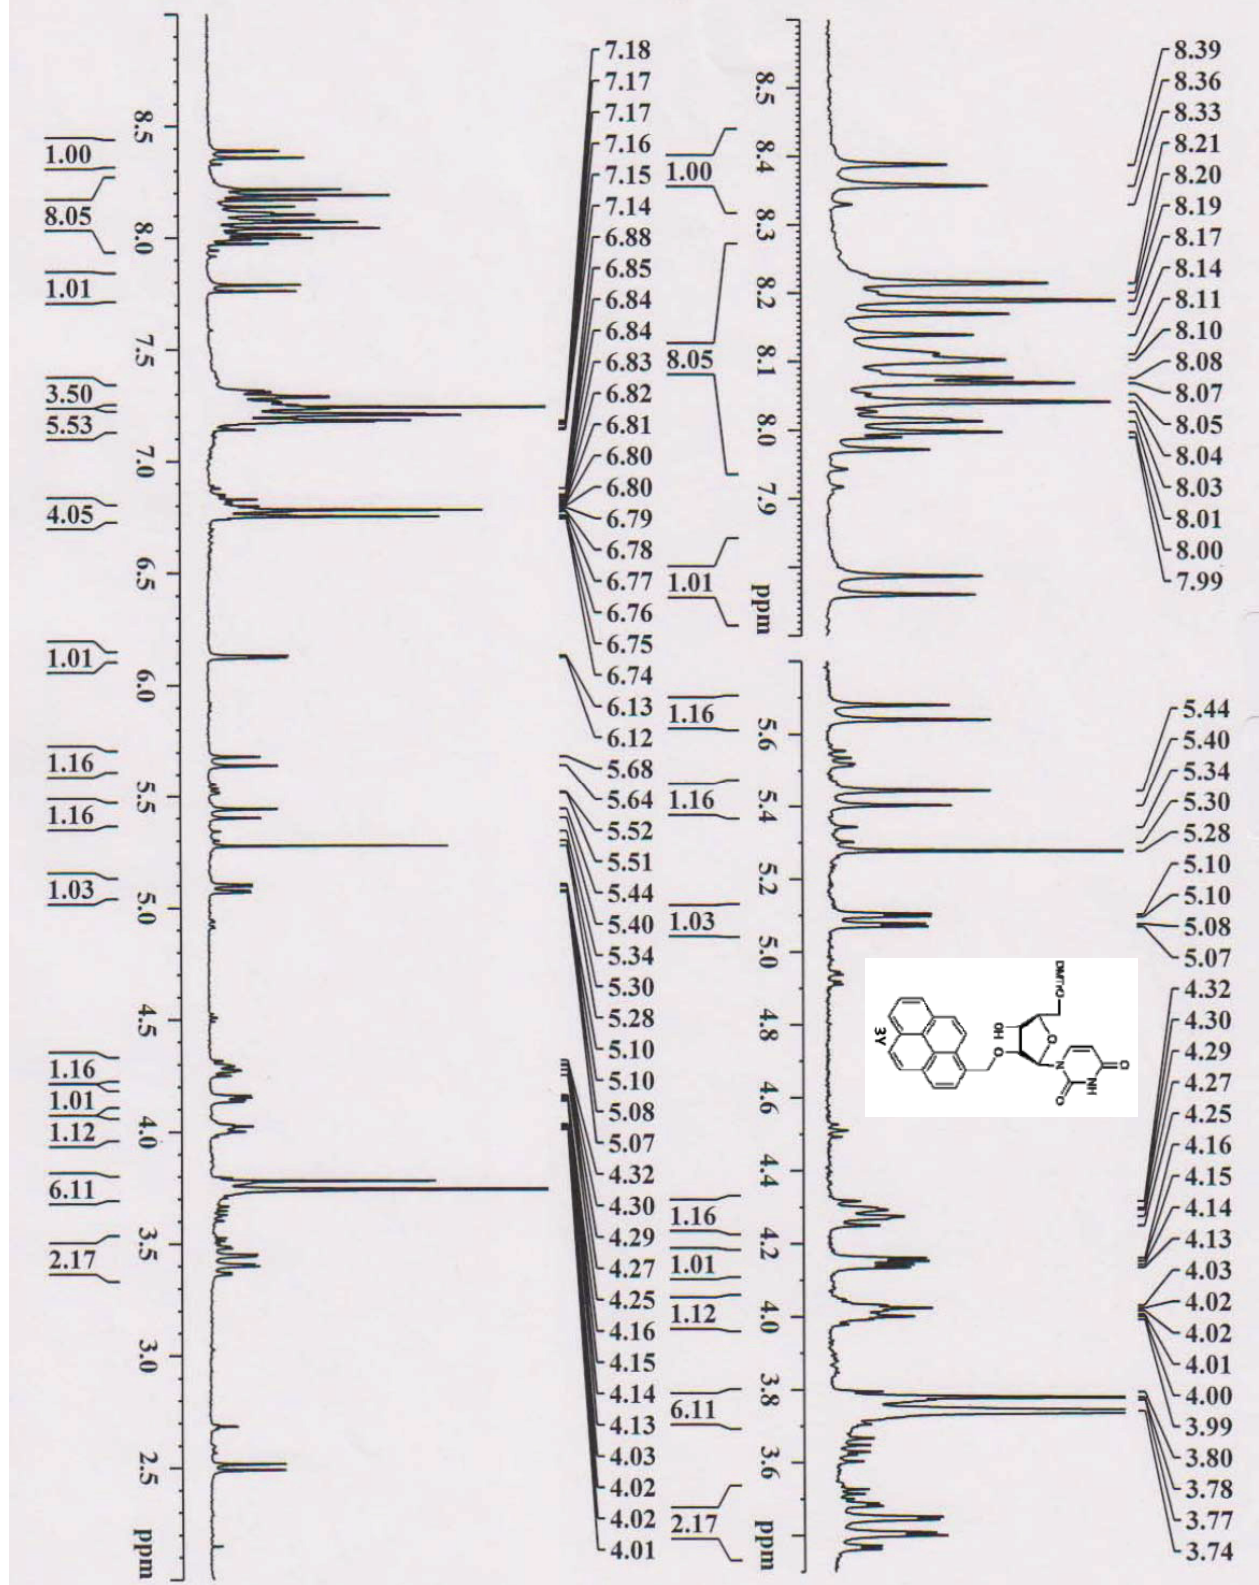





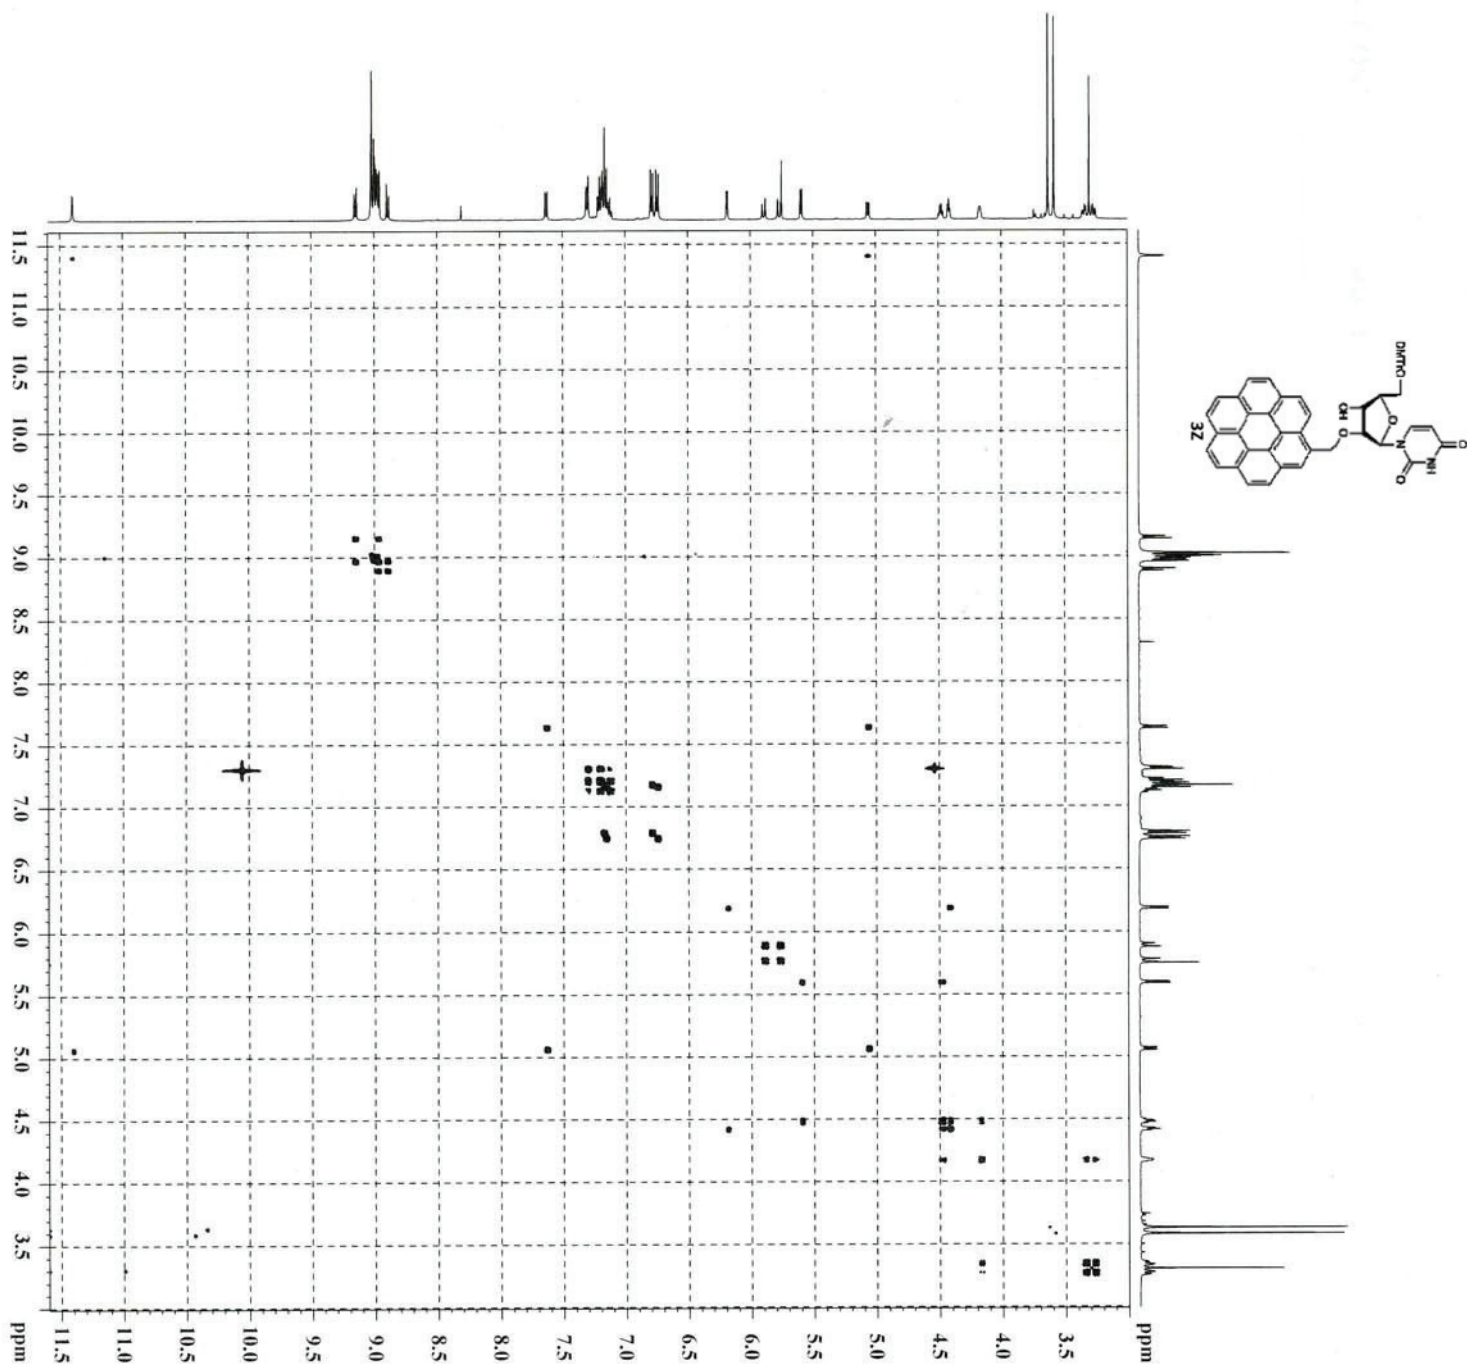



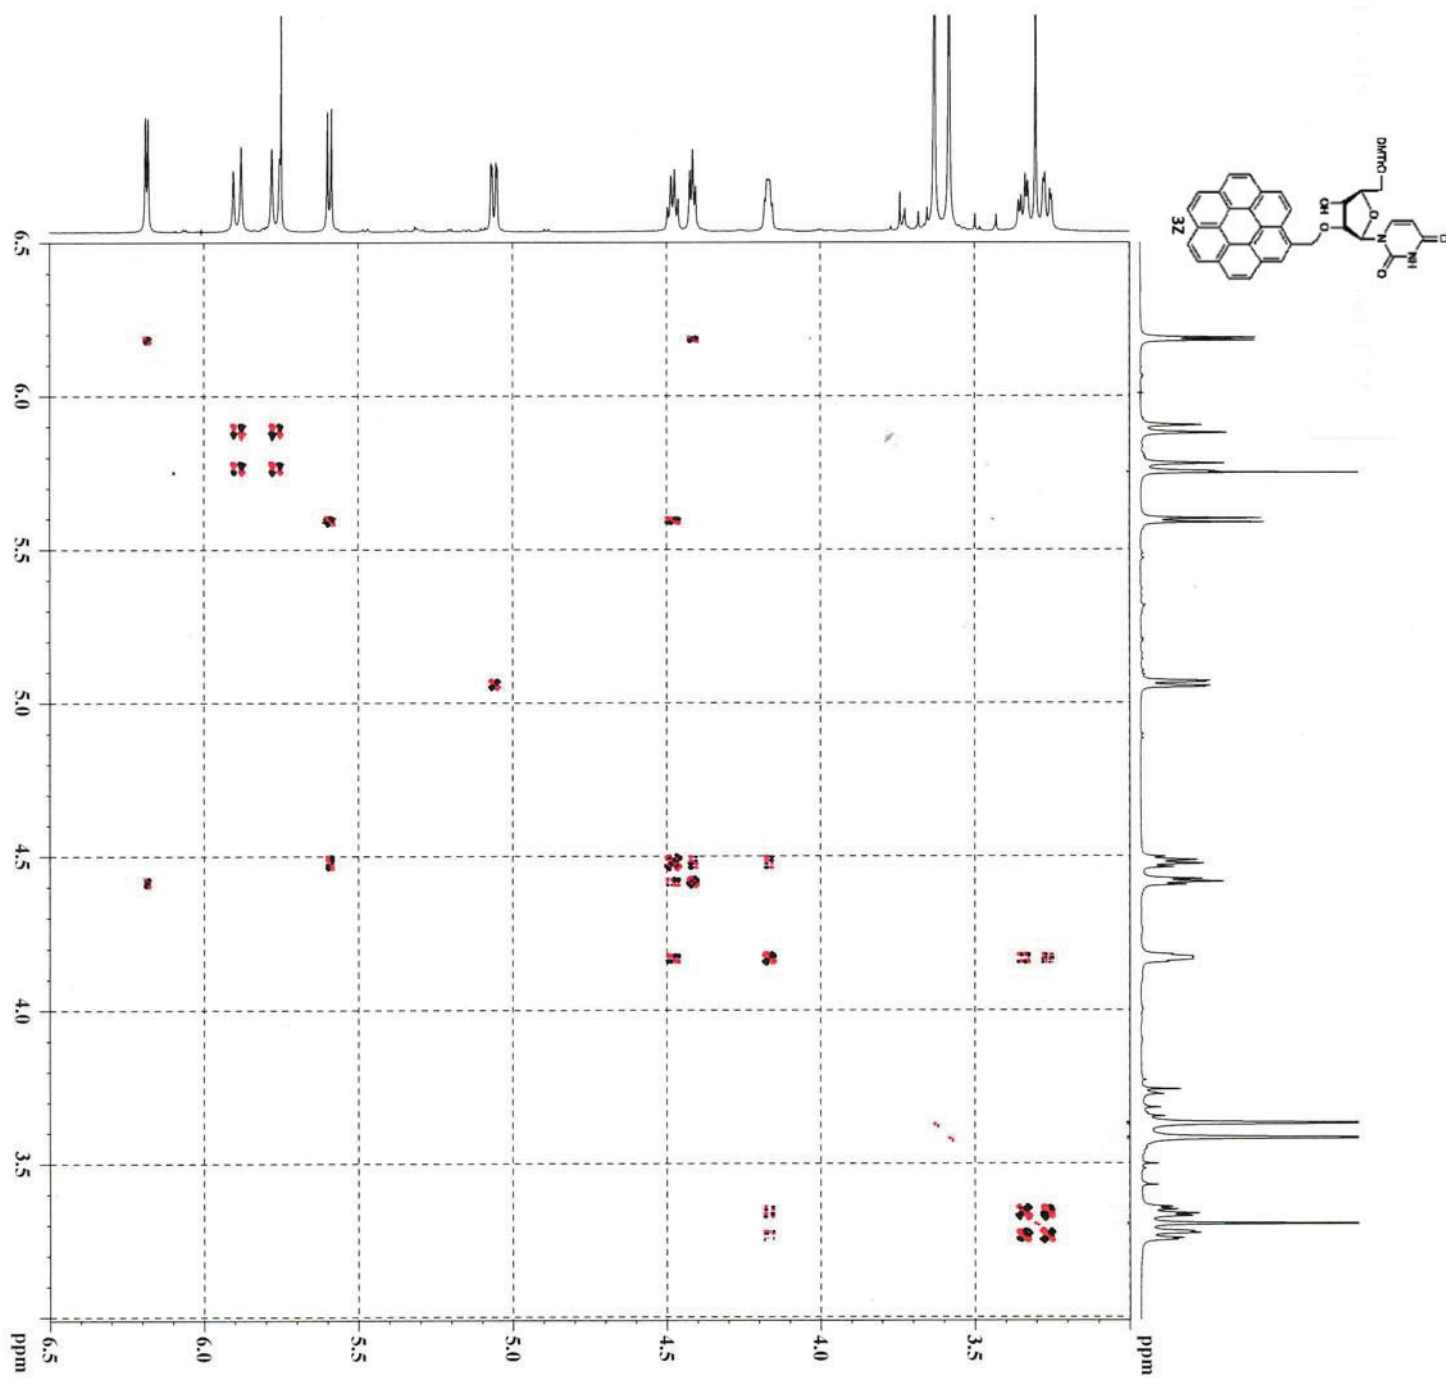

32

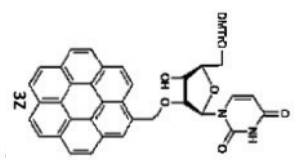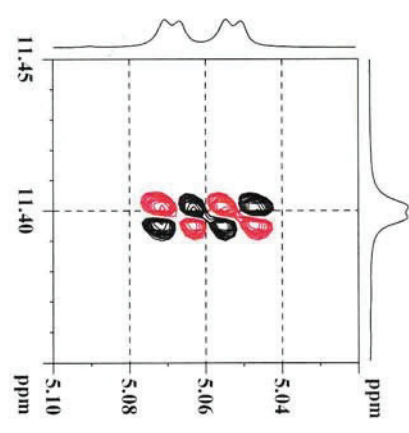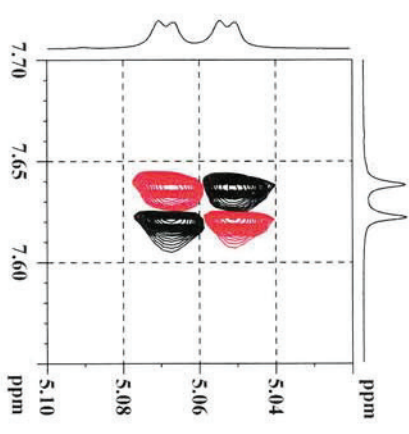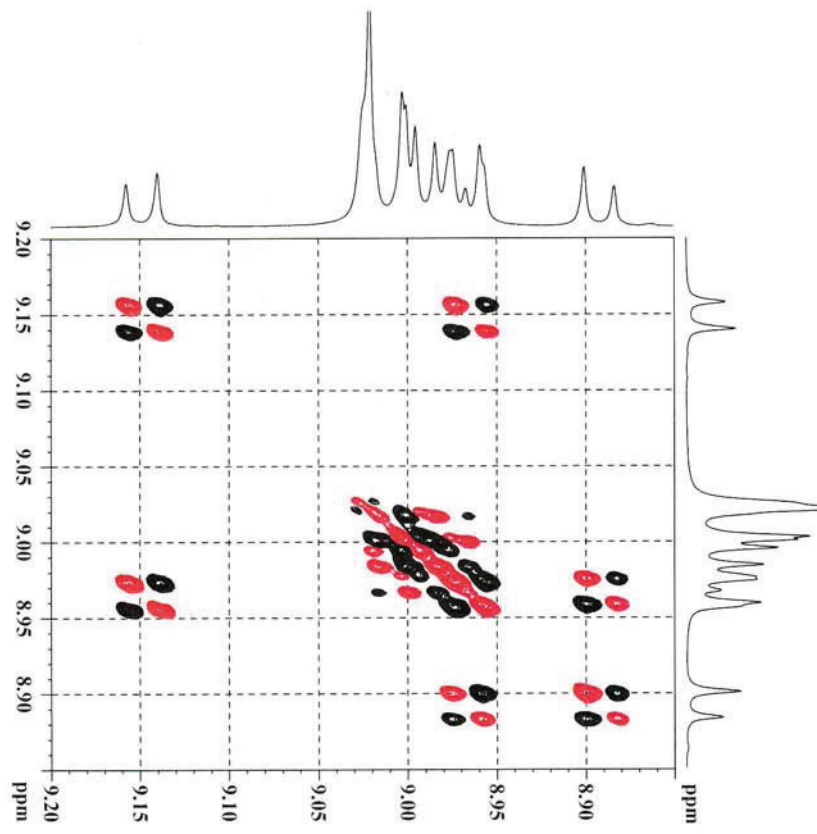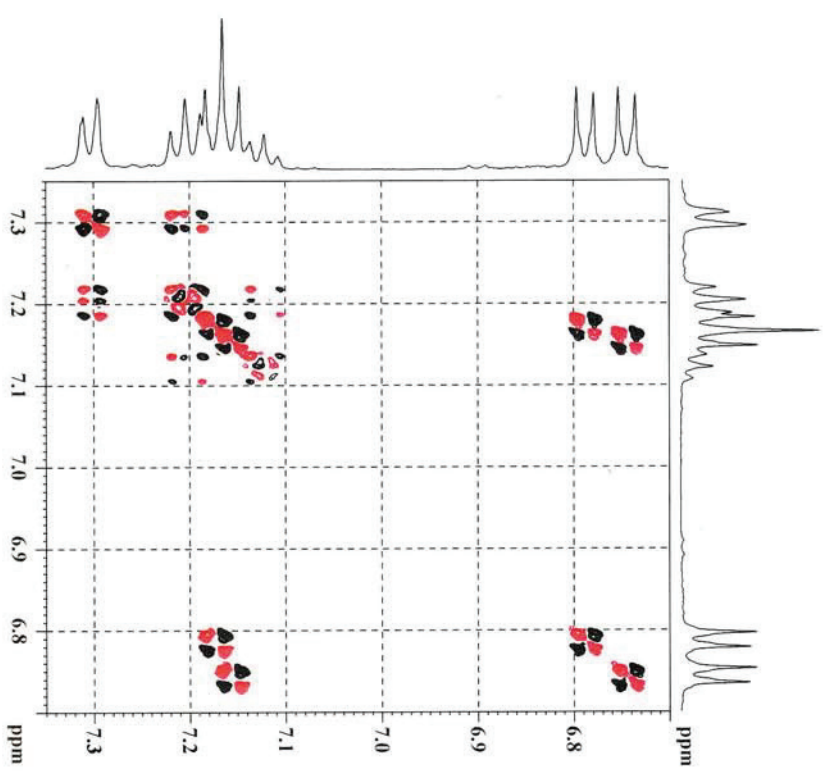

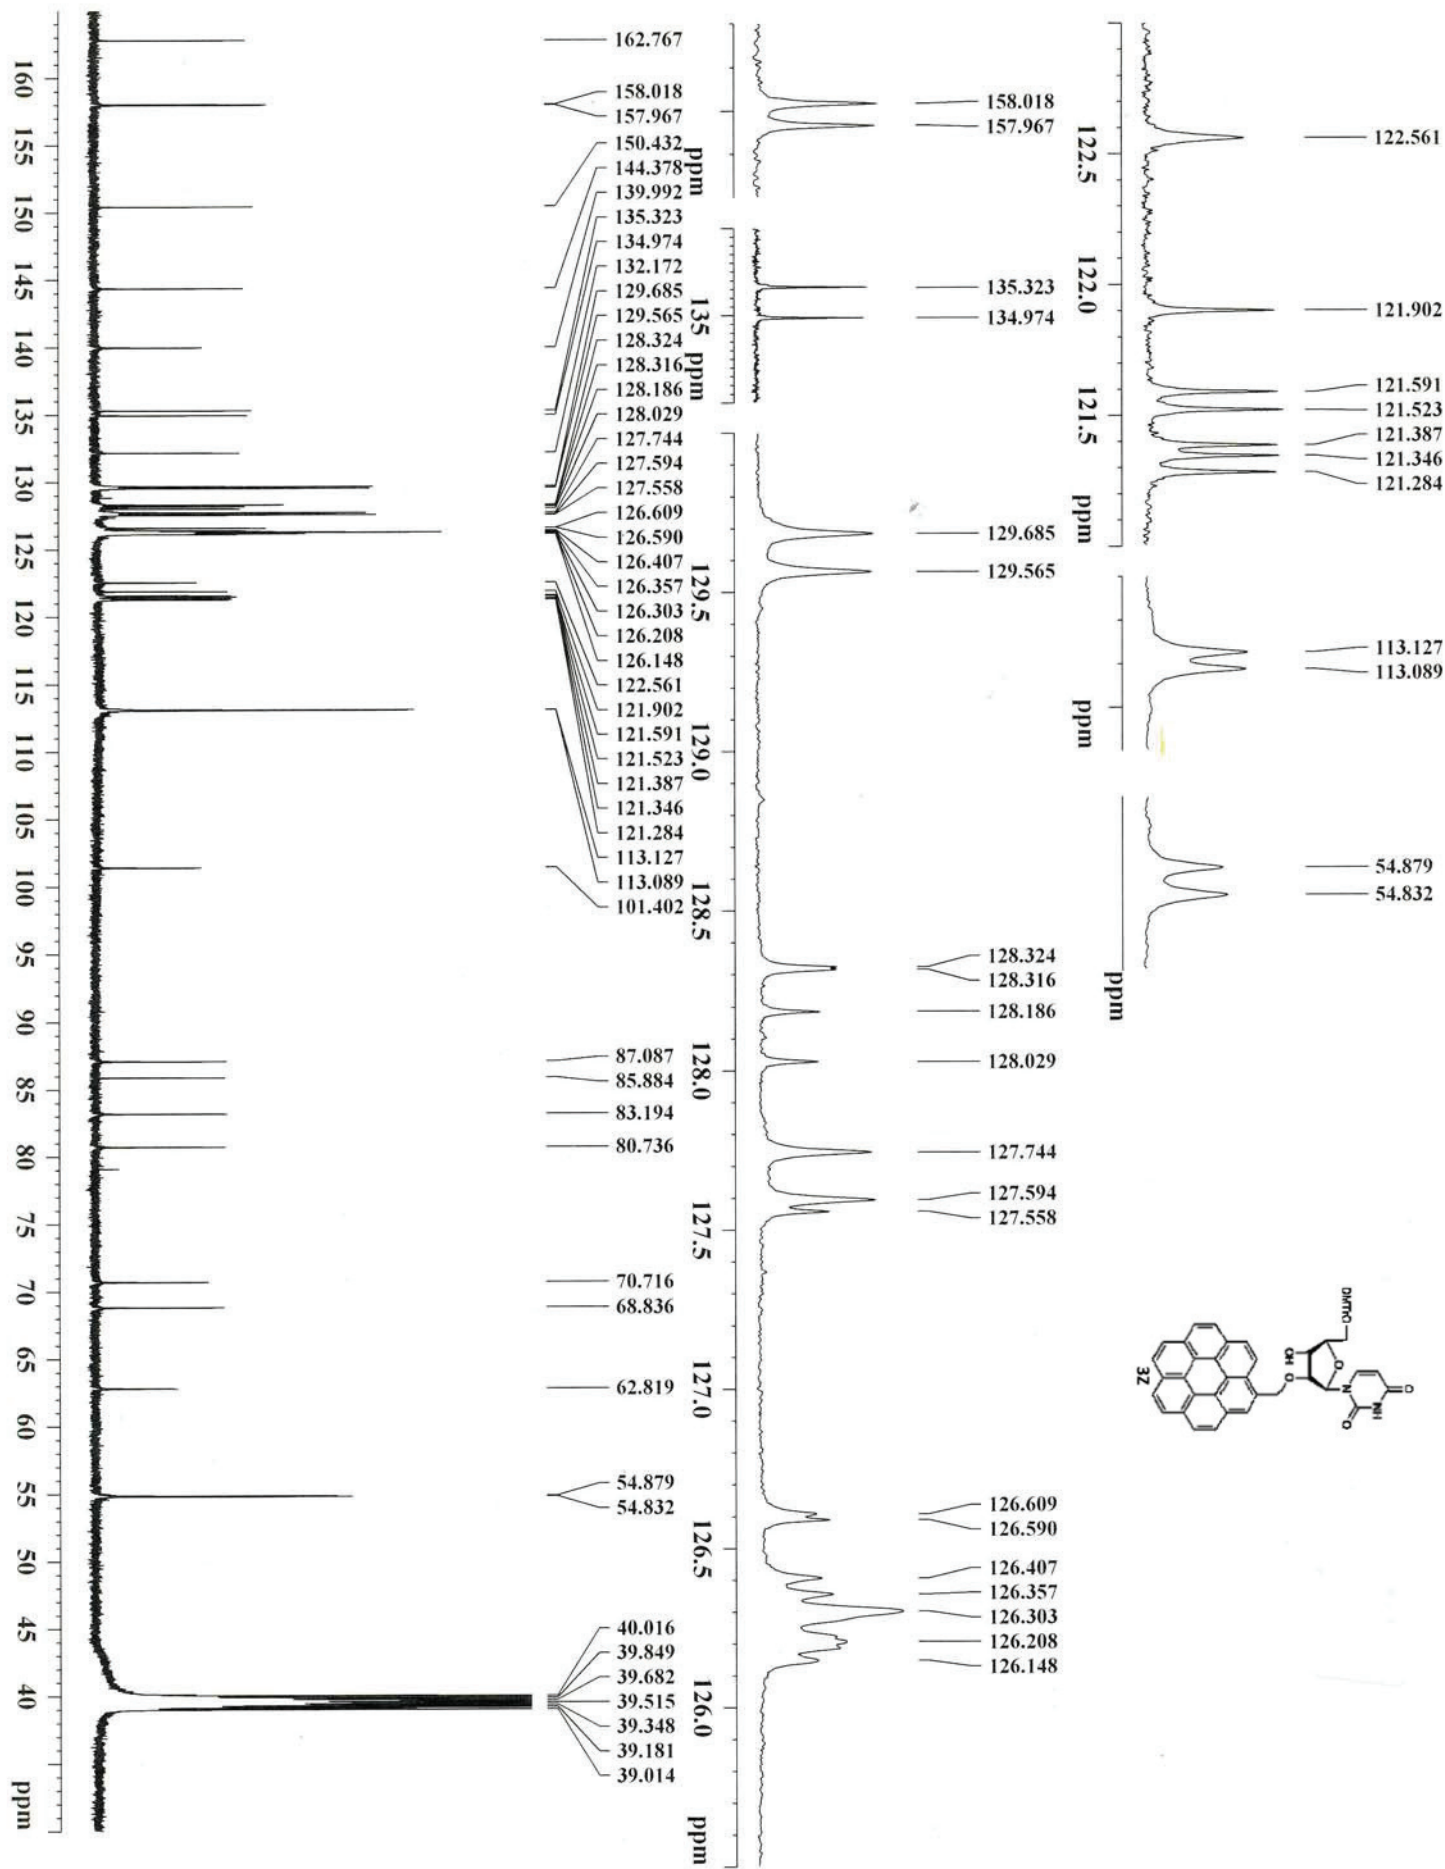

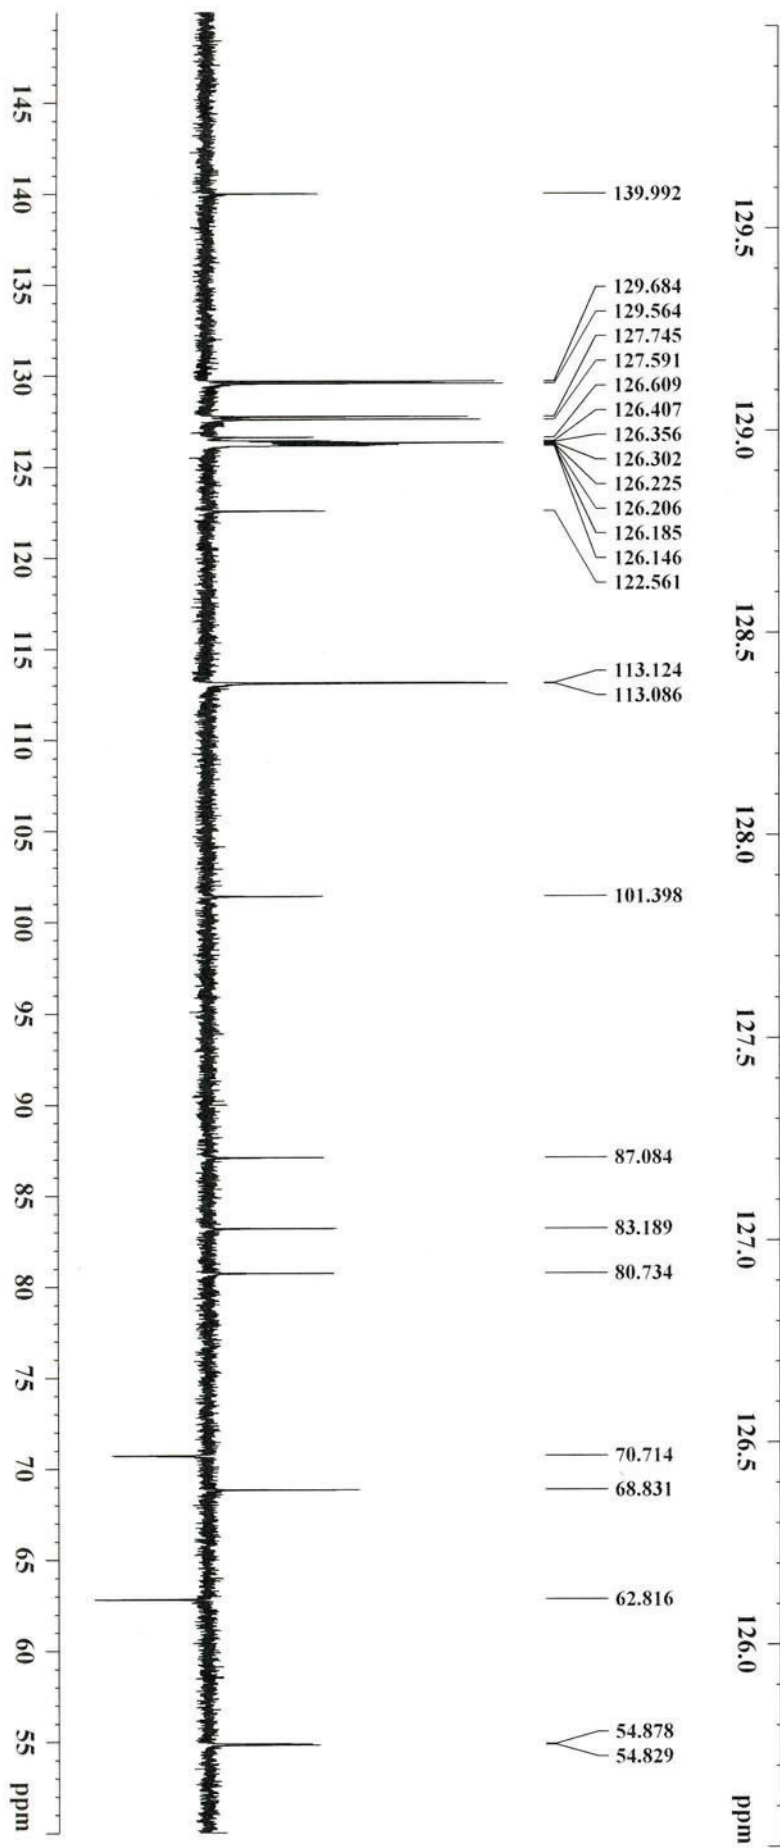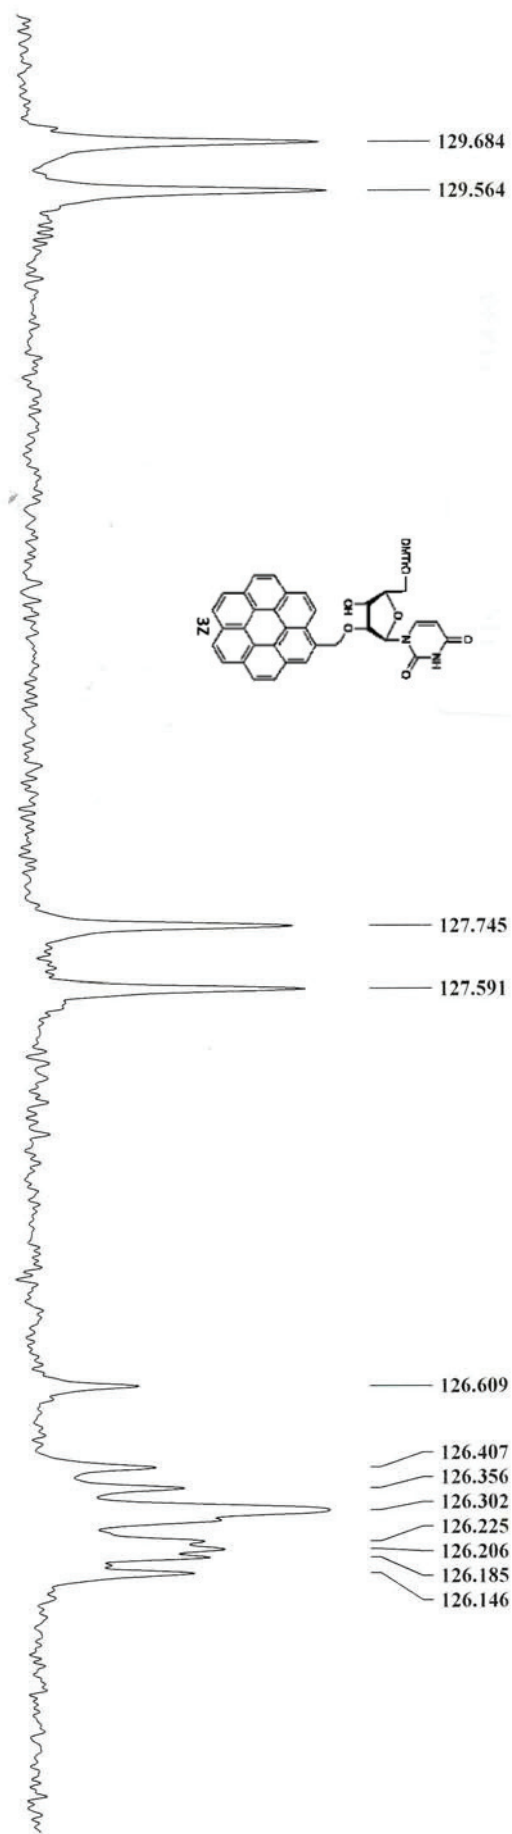



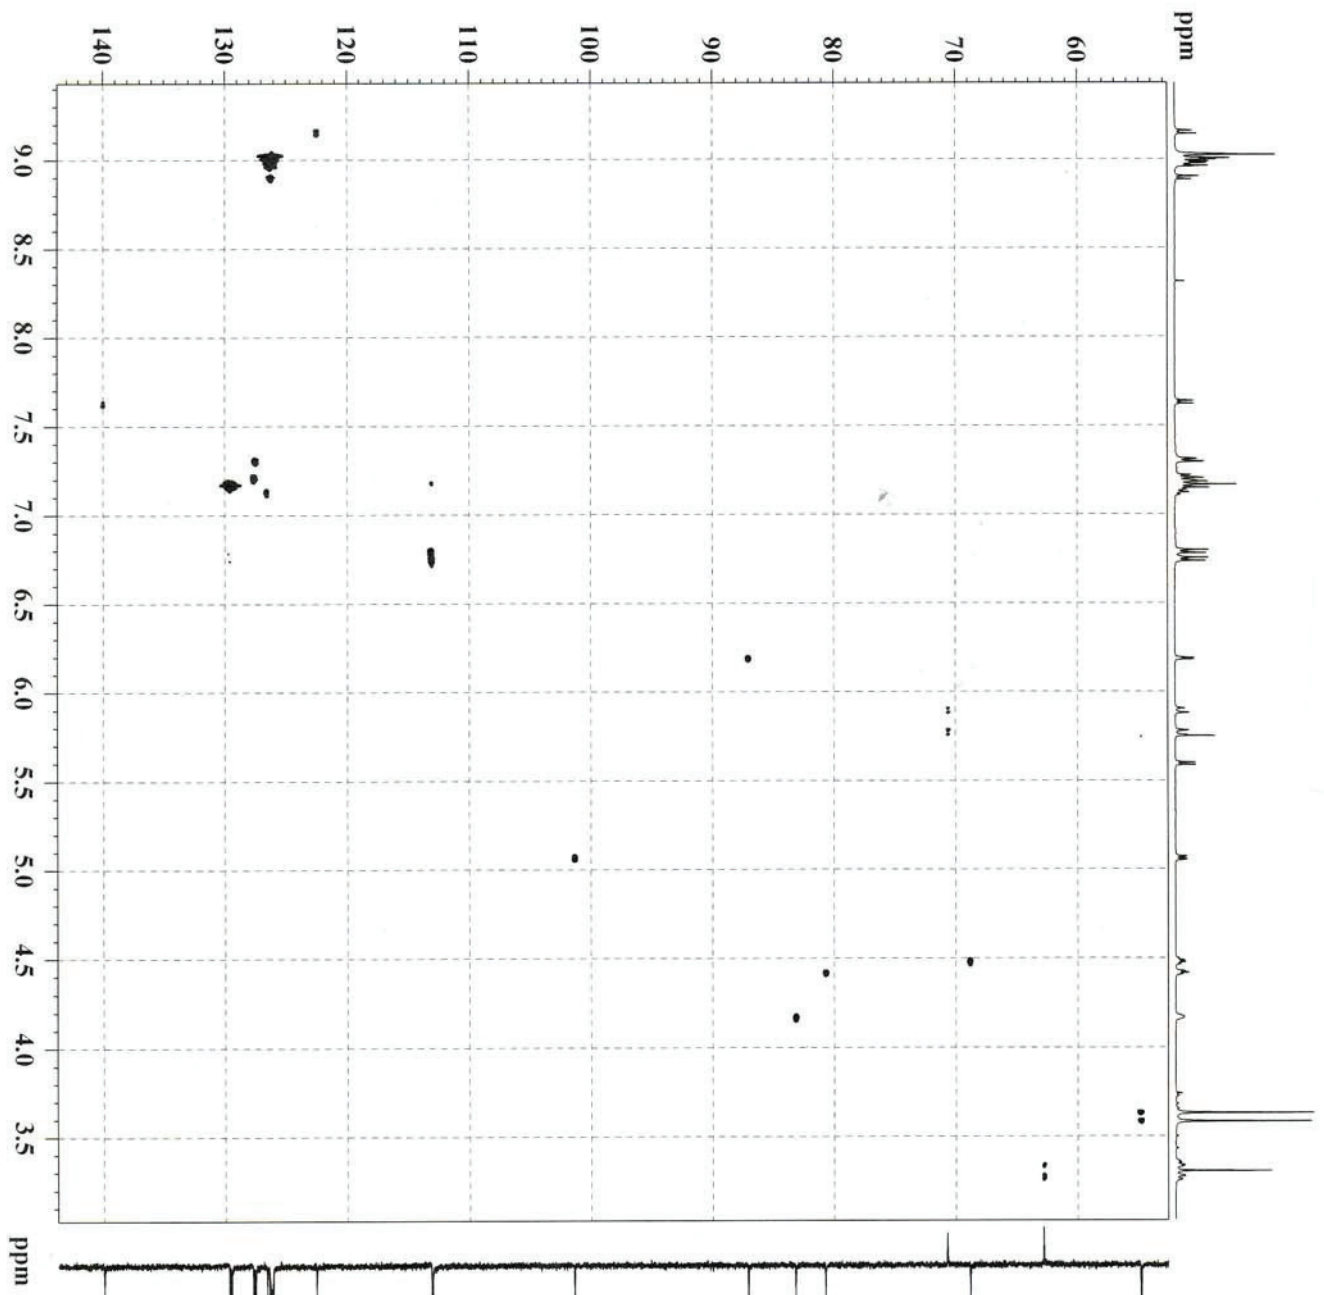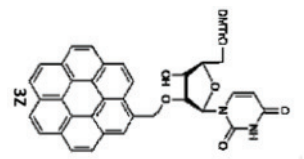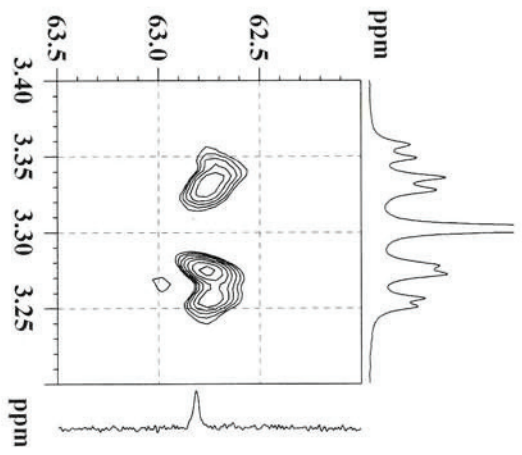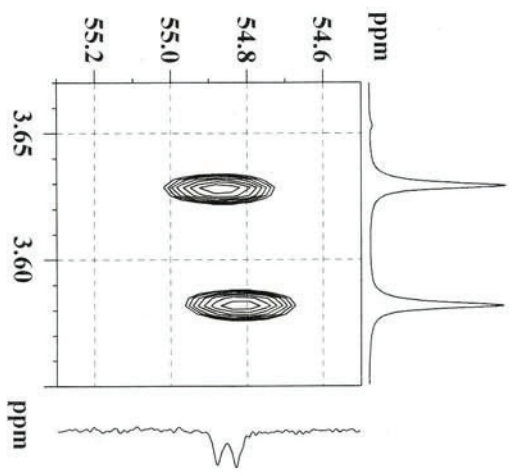

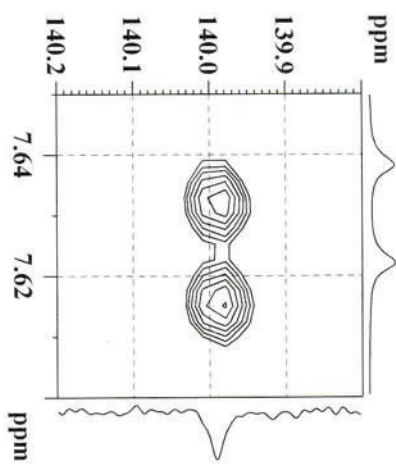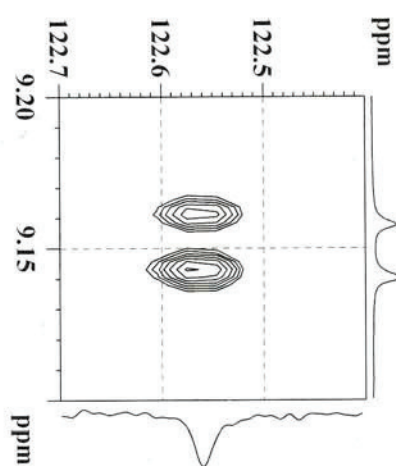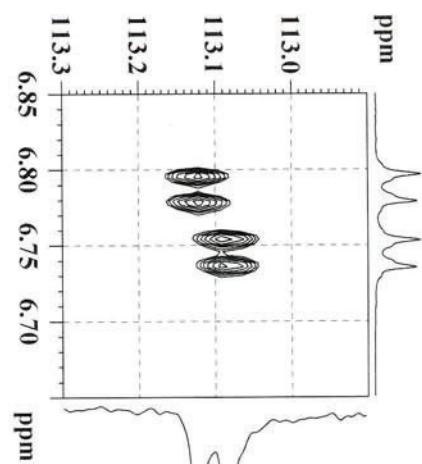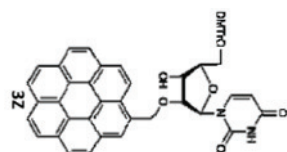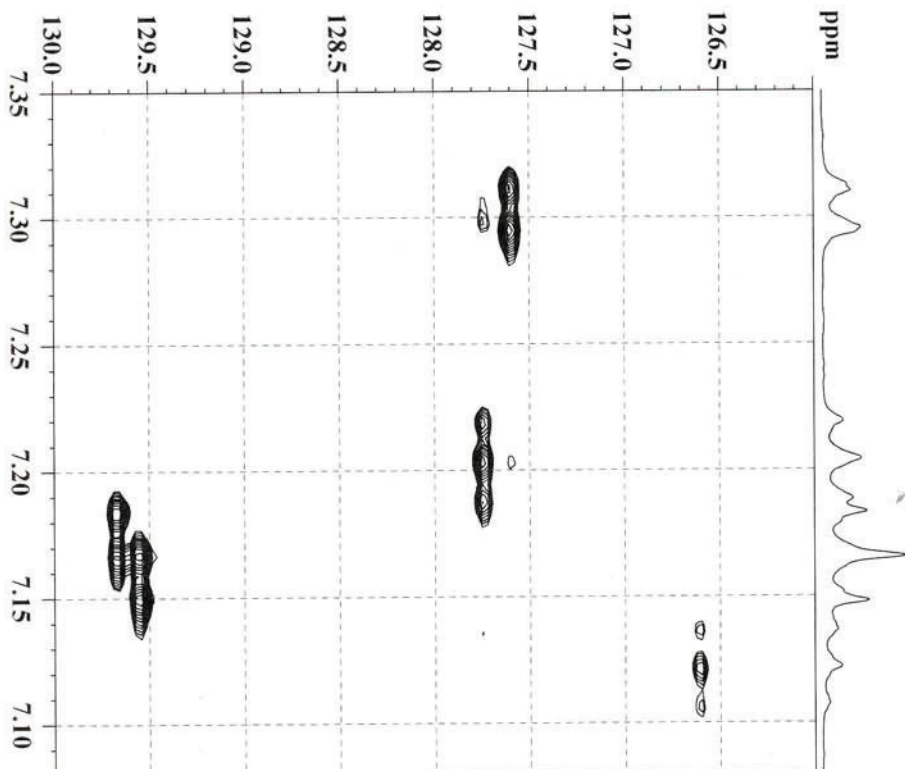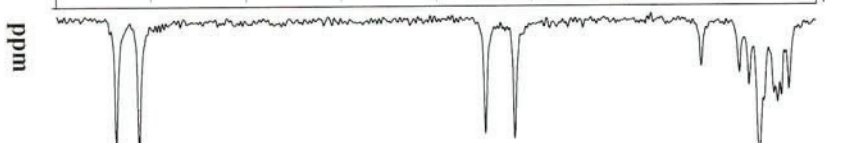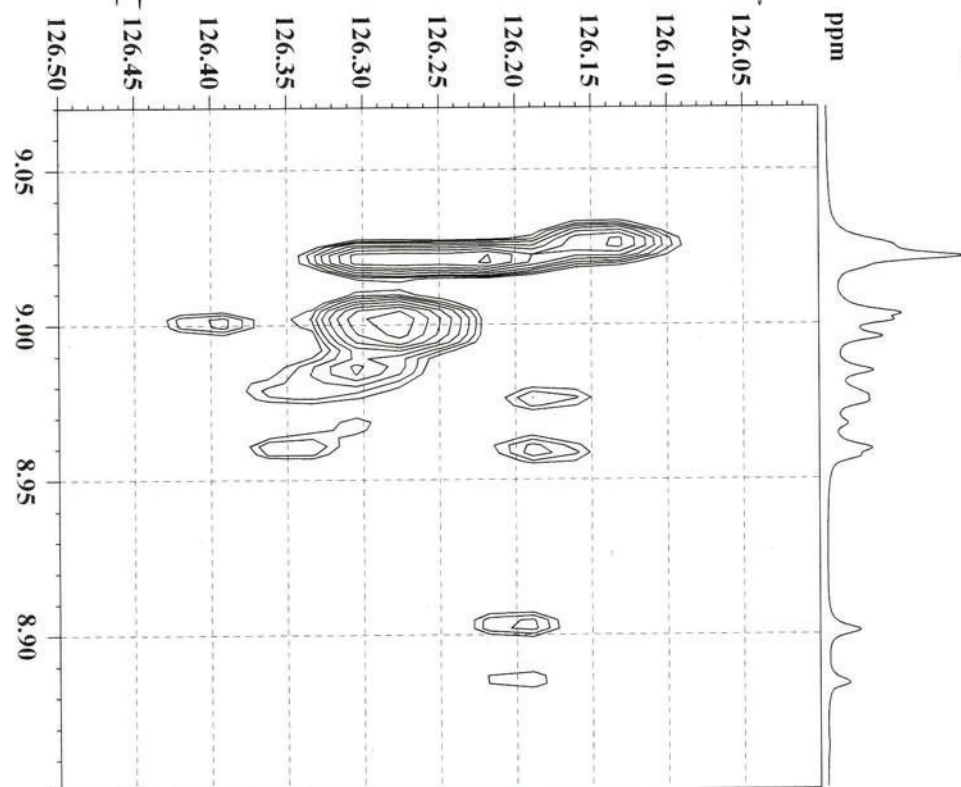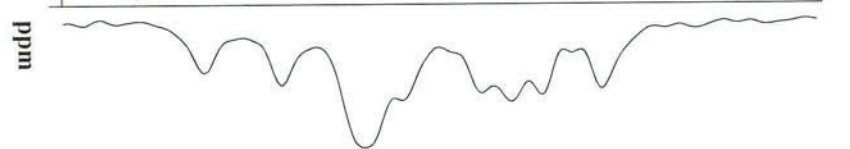

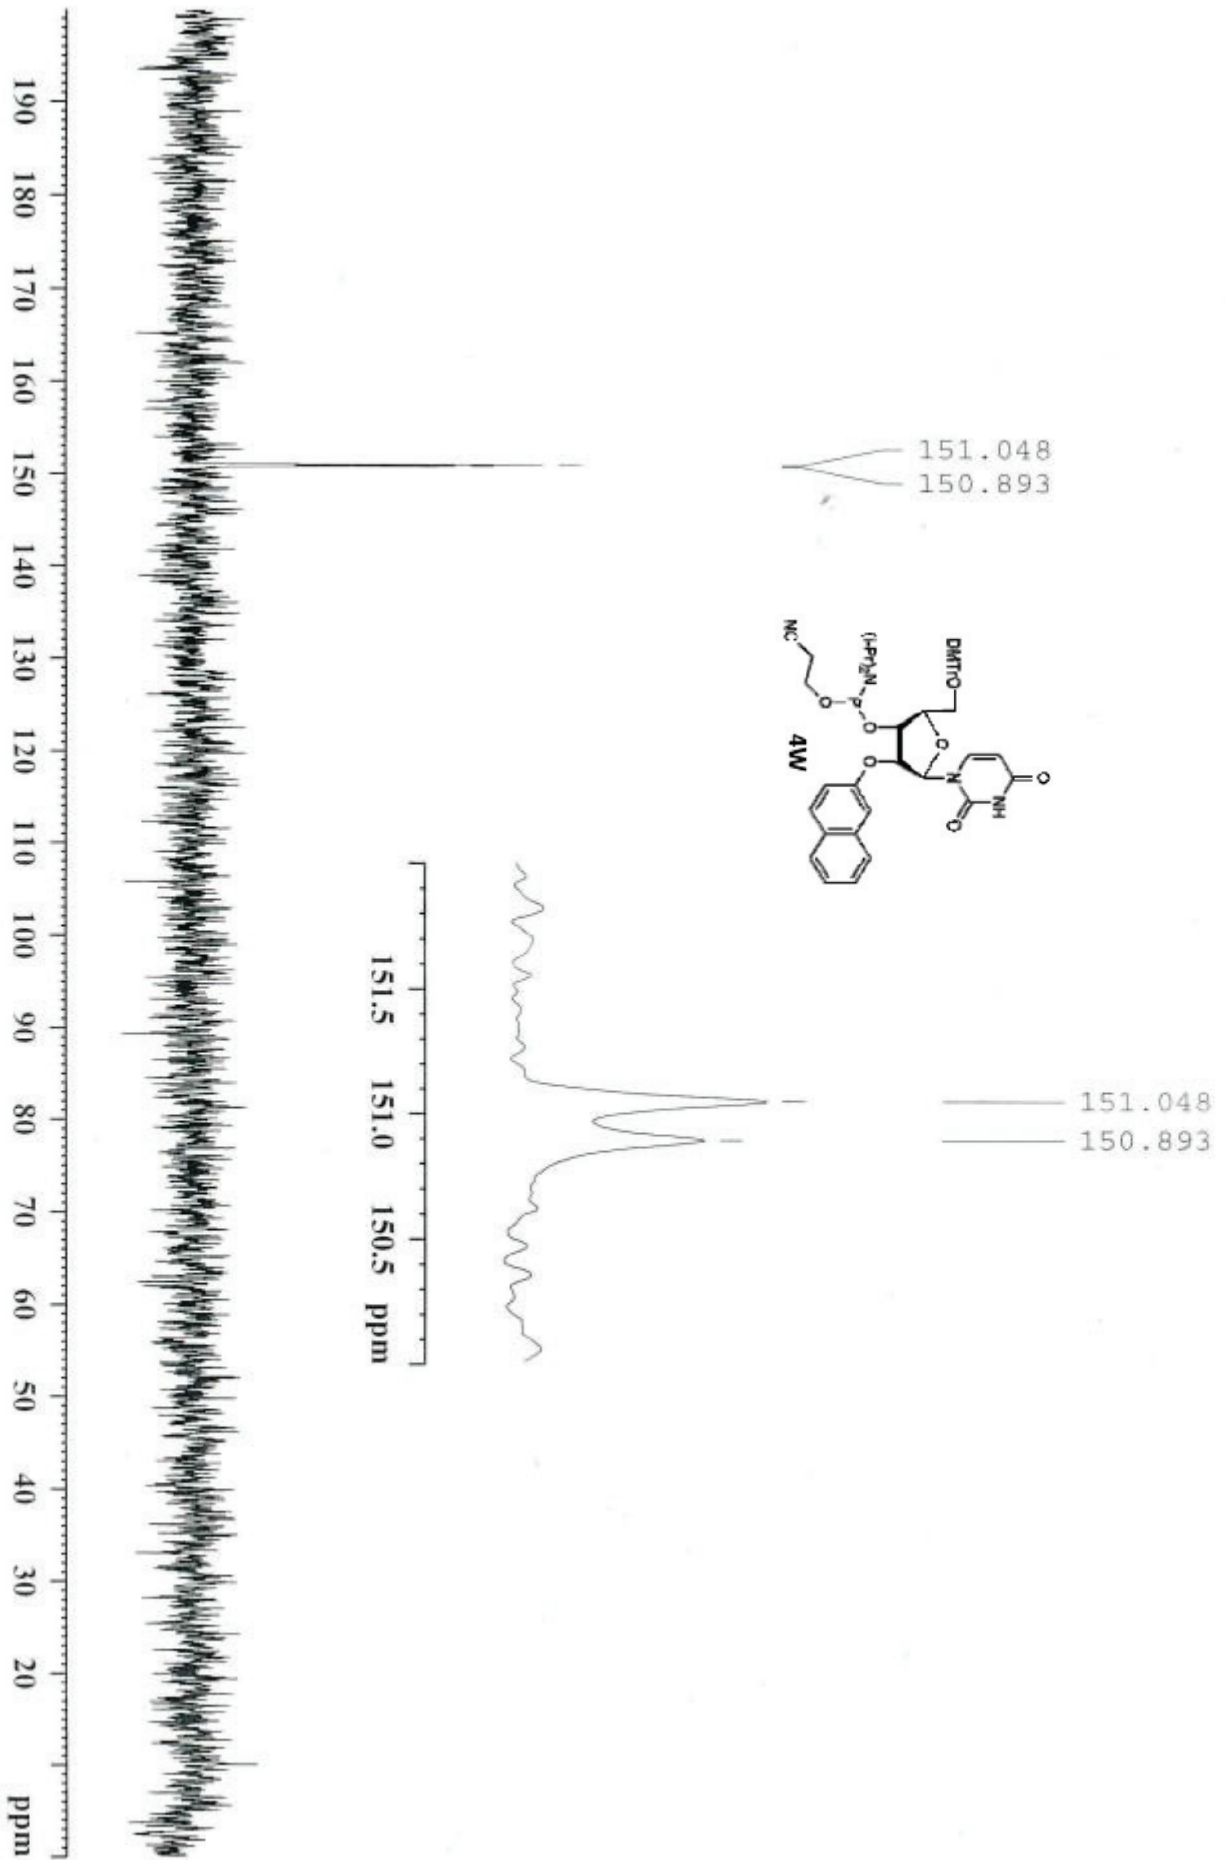

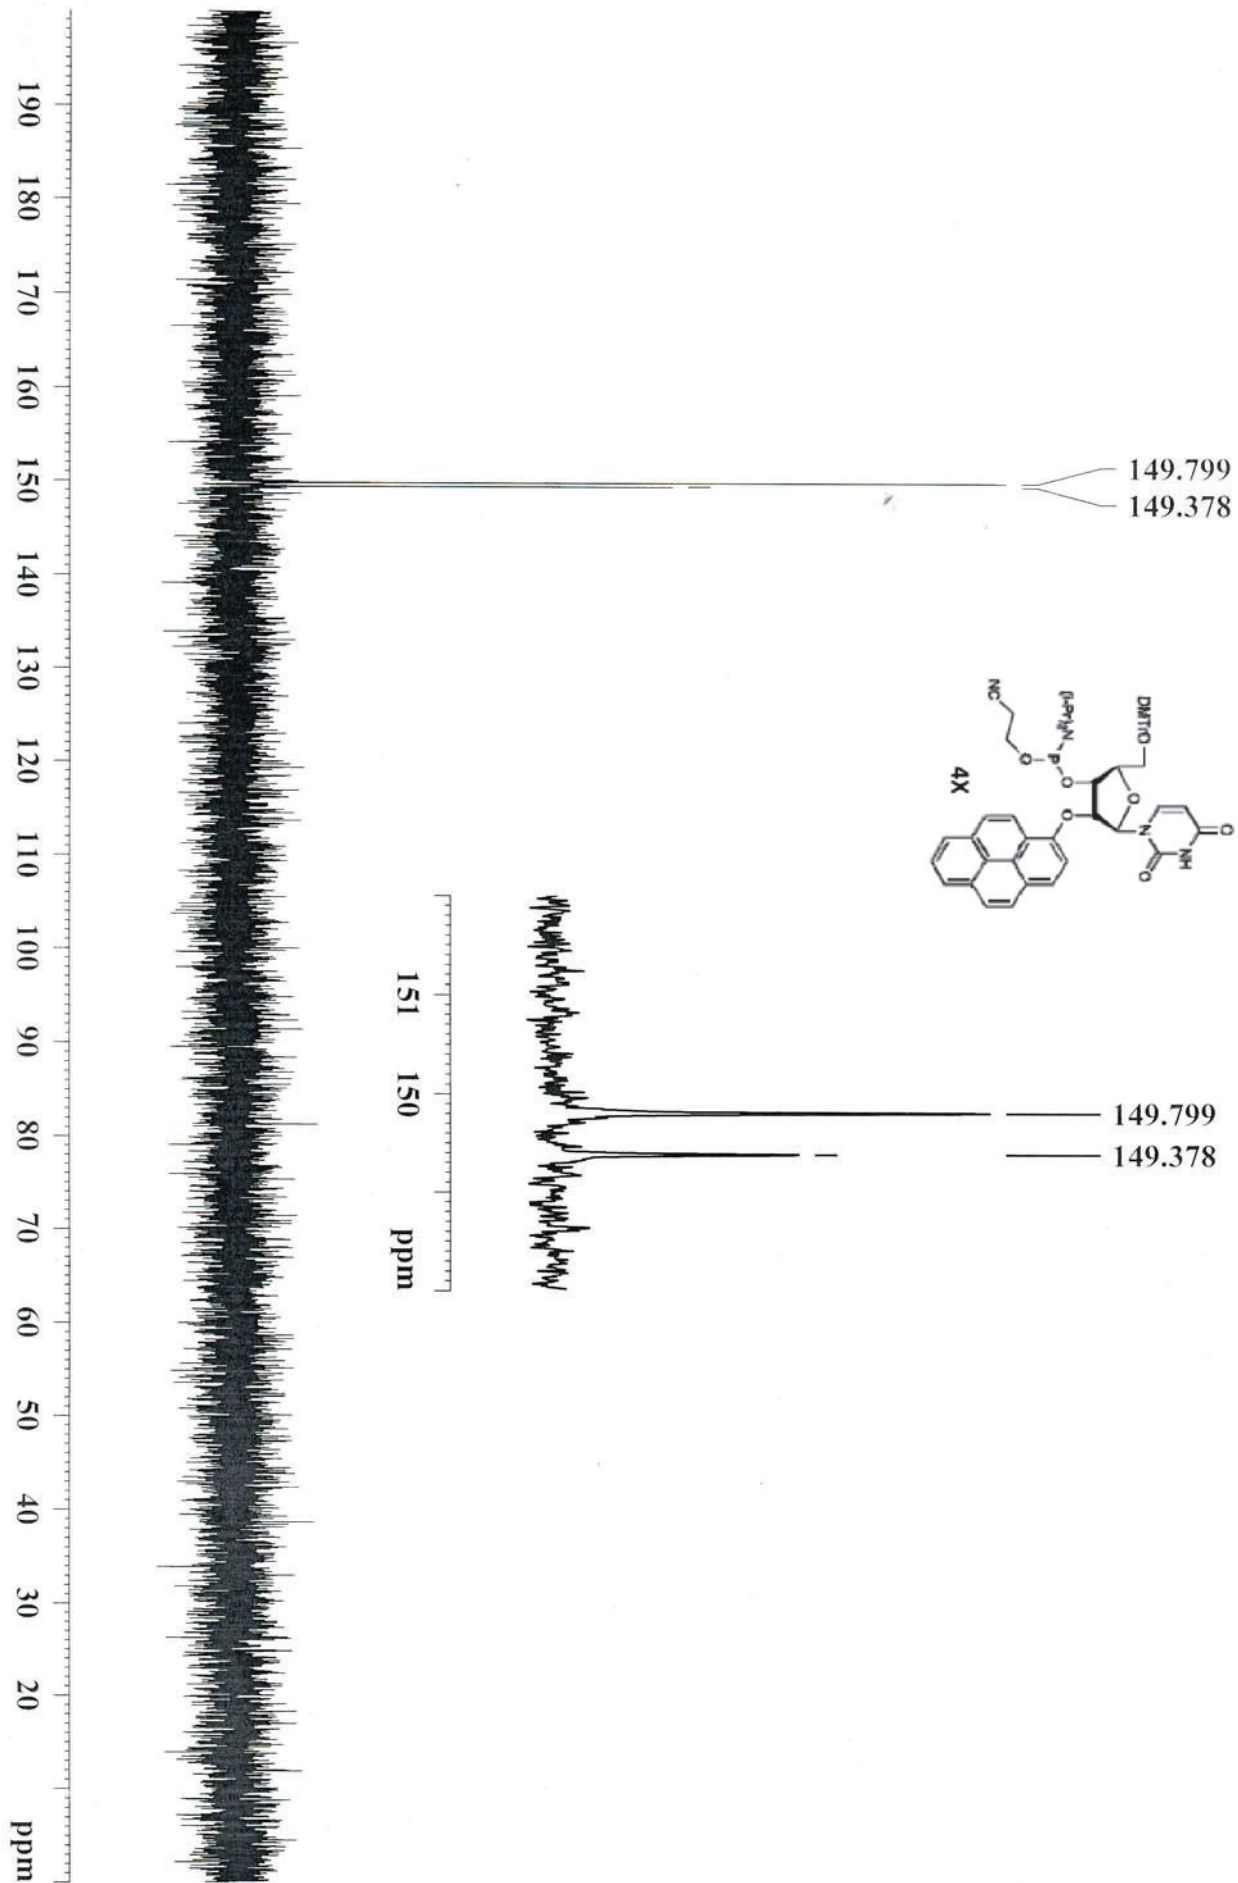



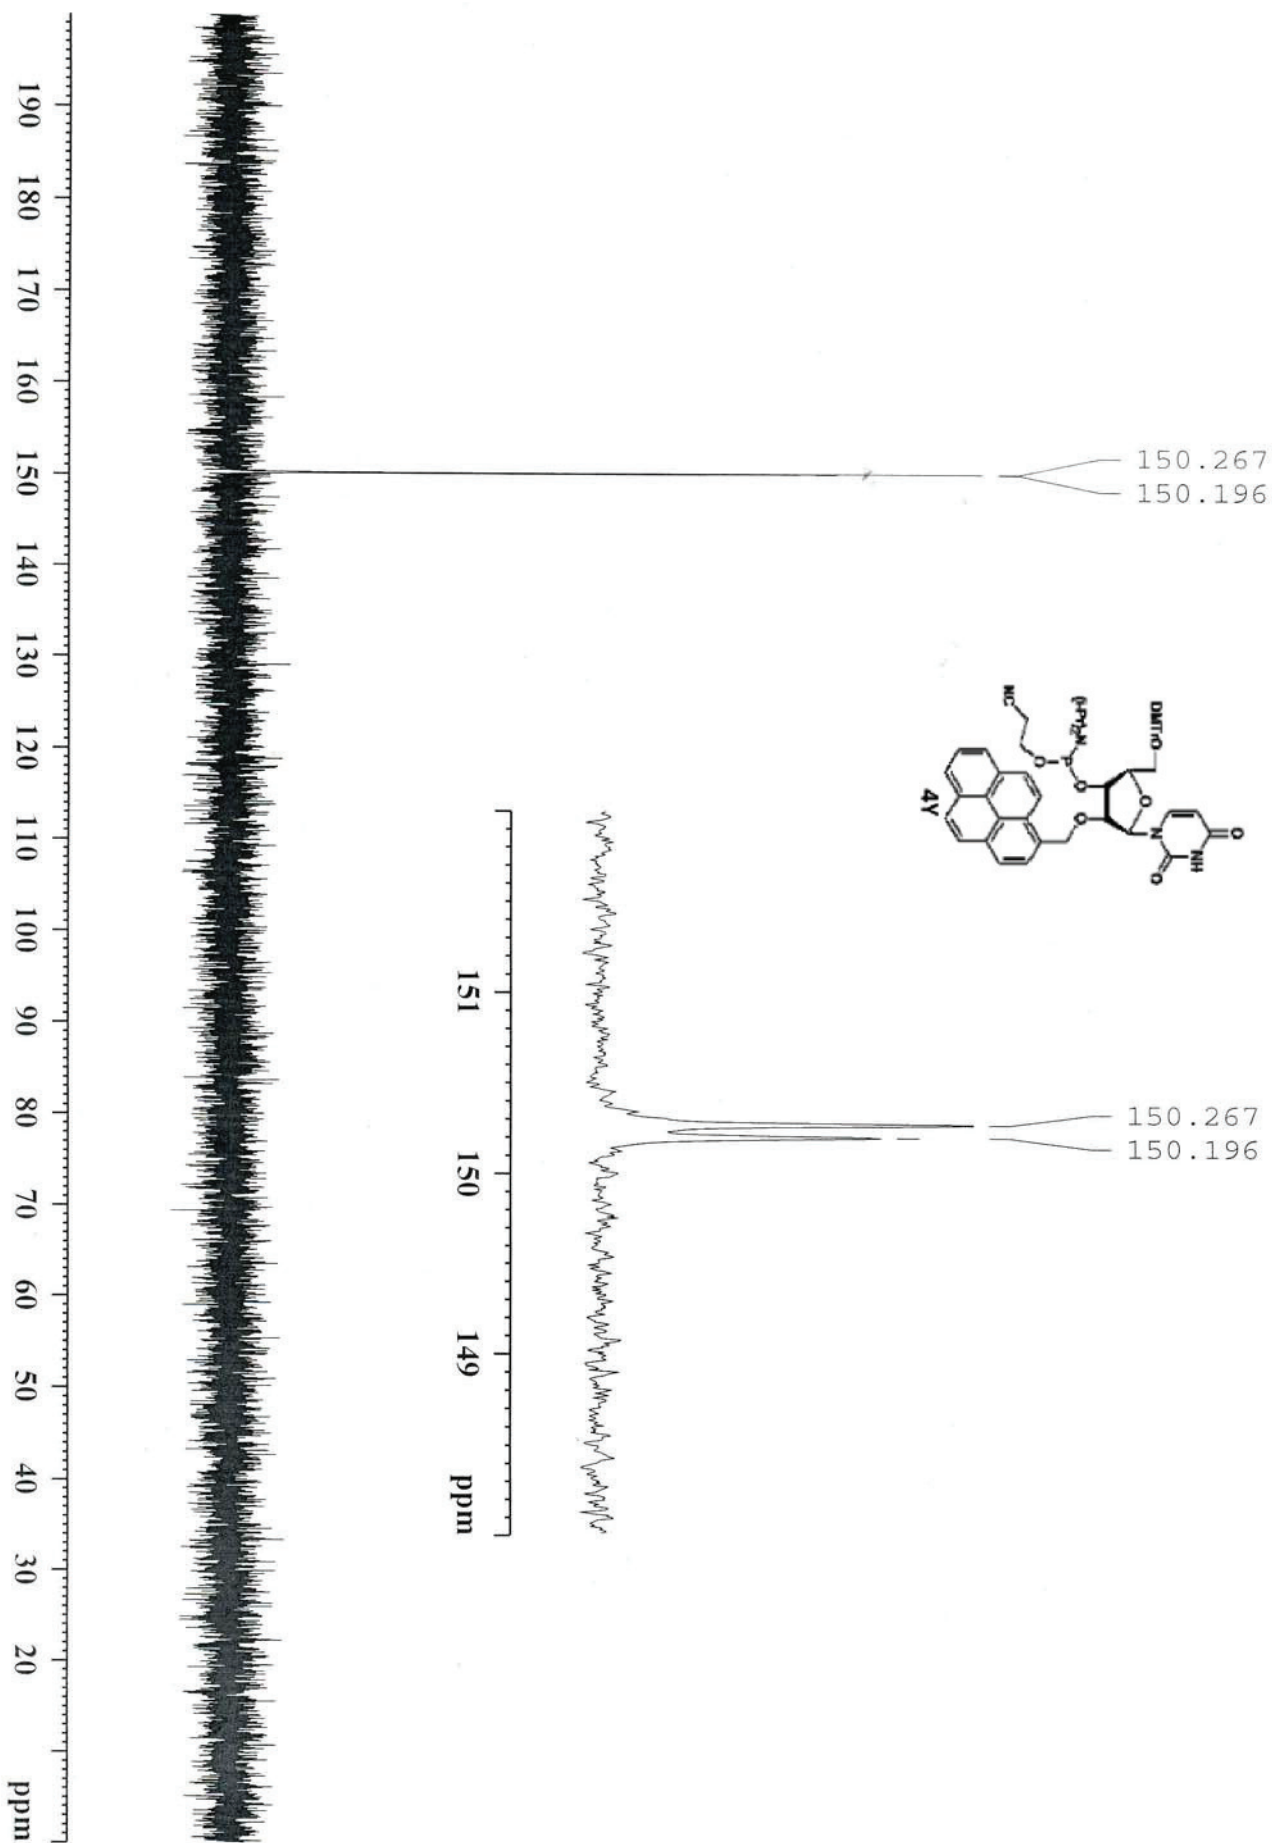

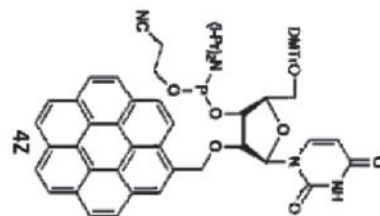

— 150.17

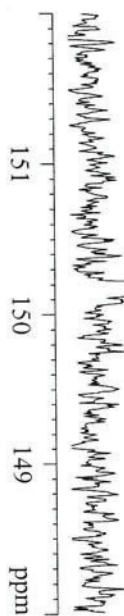

— 150.17

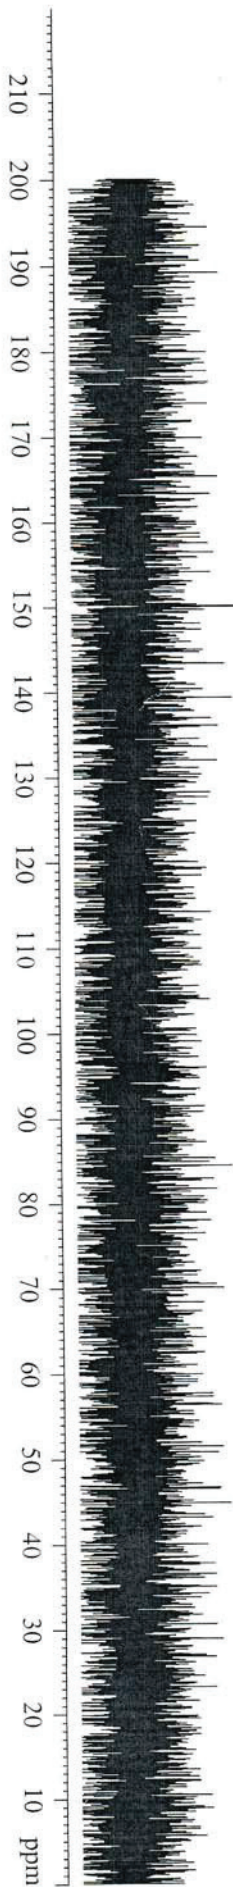

Supplement: NIHMS317954-supplement-3_si_003.pdf [file NIHMS317954-supplement-3_si_003.pdf]
